# Supplementary material for: Material Properties from Air Puff Corneal Deformation by Numerical Simulations on Model Corneas
Source: PLoS One. 2016 Oct 28;11(10):e0165669. doi: 10.1371/journal.pone.0165669 (PMC5085055; doi:10.1371/journal.pone.0165669)
Supplement: S1 Dataset — (XLSX) [file pone.0165669.s001.xlsx]

## Sheet: G prof
Spatial profiles																						Temporal profiles
g1	sim			g2	sim			g2	sim				meas	g3		g2		g1				sim	g3	g2	g1		meas	g3	g2	g1
x0	y0	x1	y1	x0	y0	x1	y1	x0	y0	x1	y1		x	y0	y1	y0	y1	y0	y1			time [ms]	Apex Displacement [mm]				time [ms]	Apex Displacement [mm]
-1.3573e-06	0	9.0798e-06	-1.71103	-7.3958e-06	0	2.1122e-05	-1.55589	-5.8937e-06	0	2.2764e-05	-1.38241		-4									0	0	0	0		0	0	0	0
0.0148053	0	0.0138829	-1.71093	0.0523755	-0.00022	0.0481418	-1.55549	0.0520516	-0.00012	0.0472801	-1.38202		-3.986									0.2	0.000165	0.000189	0.000105		0.231	0.018112	0.049967	0.055142
0.0296108	-0.00011	0.0277611	-1.71093	0.104747	-0.0007	0.0962664	-1.55419	0.104098	-0.00068	0.0945559	-1.38097		-3.972									0.5	0.000273	0.000314	0.000462		0.462	0.018198	0.049972	0.055142
0.0443873	-0.00013	0.0416182	-1.71073	0.157119	-0.00154	0.144386	-1.55209	0.156145	-0.00148	0.141835	-1.37913		-3.958									0.7	0.000295	0.00034	0.000604		0.693	0.017802	0.049304	0.055142
0.059163	-0.00025	0.0554718	-1.71043	0.20949	-0.00273	0.192476	-1.54919	0.208191	-0.00253	0.189108	-1.37644		-3.944									0.9	0.000238	0.000268	0.000447		0.924	0.01717	0.048102	0.055142
0.0739447	-0.00037	0.0693304	-1.71013	0.261846	-0.00418	0.240547	-1.54529	0.260226	-0.00402	0.236364	-1.37316		-3.93									1.2	0.000126	0.000132	9.2e-05		1.155	0.015051	0.046427	0.055142
0.0887267	-0.00051	0.0831842	-1.70973	0.31419	-0.00608	0.288567	-1.54069	0.312257	-0.00574	0.283615	-1.36906		-3.916									1.4	-1.3e-05	-3.2e-05	-0.000261		1.386	0.01274	0.043027	0.055142
0.103516	-0.00074	0.0970473	-1.70933	0.366529	-0.00824	0.336545	-1.53519	0.364266	-0.00781	0.330845	-1.36428		-3.902									1.6	-0.000161	-0.000197	-0.000401		1.617	0.01122	0.040265	0.052142
0.118308	-0.00089	0.110909	-1.70873	0.418843	-0.01075	0.384473	-1.52889	0.416271	-0.01022	0.378072	-1.35881		-3.888									1.8	-0.00029	-0.000319	-0.000184		1.848	0.007722	0.037604	0.049142
0.133105	-0.00114	0.124778	-1.70813	0.471141	-0.01361	0.432345	-1.52189	0.468252	-0.01297	0.425272	-1.35268		-3.874									2.1	-0.000337	-0.000327	0.000307		2.079	0.005744	0.034943	0.046142
0.147902	-0.00139	0.138639	-1.70743	0.523413	-0.01683	0.480155	-1.51399	0.520218	-0.01596	0.472459	-1.34576		-3.86									2.3	-0.000237	-0.000163	0.00069		2.31	0.00418	0.032176	0.043142
0.16271	-0.00166	0.152508	-1.70663	0.575669	-0.0203	0.527896	-1.50531	0.572159	-0.0193	0.519639	-1.33821		-3.846									2.5	-0.001845	-0.002136	-0.003854		2.541	0.002181	0.029975	0.041142
0.177517	-0.00202	0.166379	-1.70583	0.627906	-0.02412	0.575591	-1.49586	0.624085	-0.02297	0.566813	-1.33003		-3.832									2.8	-0.006343	-0.007655	-0.013674		2.772	-0.000185	0.026568	0.038142
0.192345	-0.0024	0.18026	-1.70494	0.680105	-0.0283	0.623215	-1.4857	0.675975	-0.02698	0.613967	-1.32125		-3.818									3	-0.010899	-0.013054	-0.019493		3.003	-0.003308	0.023621	0.035142
0.207163	-0.00278	0.194135	-1.70396	0.732275	-0.03282	0.670781	-1.47481	0.727848	-0.03123	0.66112	-1.31174		-3.804	-0.913706	-0.937217	-1.09859	-1.04641	-0.97042	-0.960177			3.2	-0.013248	-0.015475	-0.018747		3.234	-0.007162	0.019853	0.032142
0.221991	-0.00316	0.208008	-1.70289	0.784426	-0.0377	0.718282	-1.46325	0.779694	-0.03582	0.708299	-1.30168		-3.79	-0.905741	-0.932157	-1.08963	-1.04222	-0.961669	-0.955629			3.5	-0.013918	-0.015807	-0.01593		3.465	-0.009665	0.016758	0.029142
0.236829	-0.00355	0.221891	-1.70172	0.836536	-0.04282	0.765742	-1.45093	0.831502	-0.04074	0.755475	-1.29108		-3.776	-0.897805	-0.927066	-1.08073	-1.03802	-0.952993	-0.951107			3.7	-0.013512	-0.014984	-0.012636		3.696	-0.012309	0.013172	0.025142
0.251677	-0.00405	0.235781	-1.70056	0.888605	-0.0484	0.813153	-1.43809	0.883283	-0.04601	0.802674	-1.27997		-3.762	-0.889901	-0.921961	-1.07187	-1.0338	-0.944392	-0.946617			3.9	-0.012195	-0.013227	-0.009732		3.927	-0.014868	0.010382	0.021142
0.266525	-0.00455	0.249665	-1.69931	0.940643	-0.05422	0.860534	-1.42449	0.935026	-0.05161	0.849881	-1.26831		-3.748	-0.882032	-0.916853	-1.06307	-1.02958	-0.935863	-0.942167			4.2	-0.010298	-0.010972	-0.008774		4.158	-0.018317	0.006179	0.017142
0.281383	-0.00506	0.263553	-1.69796	0.992629	-0.0604	0.907855	-1.41034	0.986739	-0.05745	0.897163	-1.25611		-3.734	-0.874202	-0.911755	-1.05432	-1.02536	-0.927407	-0.937766			4.4	-0.008211	-0.008711	-0.010361		4.389	-0.022198	0.002525	0.013142
0.296231	-0.00558	0.277428	-1.69651	1.04455	-0.06682	0.955156	-1.39552	1.03841	-0.06363	0.94449	-1.24346		-3.72	-0.866414	-0.906679	-1.04561	-1.02116	-0.919023	-0.933419			4.6	-0.008296	-0.009314	-0.018284		4.62	-0.026374	-0.001745	0.010142
0.311099	-0.0062	0.291316	-1.69507	1.09647	-0.07368	1.00251	-1.38032	1.09006	-0.07014	0.991868	-1.23042		-3.706	-0.858671	-0.901635	-1.03697	-1.01697	-0.910709	-0.929132			4.9	-0.012147	-0.014623	-0.030825		4.851	-0.030979	-0.006857	0.006142
0.325967	-0.00672	0.3052	-1.69344	1.14838	-0.08079	1.04994	-1.36456	1.14159	-0.07689	1.03928	-1.21694		-3.692	-0.850975	-0.896633	-1.02837	-1.0128	-0.902465	-0.924912			5.1	-0.017162	-0.021112	-0.036807		5.082	-0.037152	-0.013912	0.002142
0.340845	-0.00736	0.319088	-1.69181	1.20017	-0.08824	1.0973	-1.34841	1.19322	-0.08407	1.08694	-1.20325		-3.678	-0.843327	-0.891682	-1.01982	-1.00866	-0.89429	-0.920763			5.3	-0.022066	-0.026913	-0.0358		5.313	-0.045099	-0.024294	-0.002858
0.355712	-0.00809	0.33296	-1.69019	1.25195	-0.09604	1.14477	-1.3318	1.24463	-0.09149	1.13451	-1.18913		-3.664	-0.835731	-0.886791	-1.01133	-1.00456	-0.886183	-0.916691			5.5	-0.029413	-0.035164	-0.0391		5.544	-0.05992	-0.044272	-0.010858
0.370589	-0.00874	0.346835	-1.68837	1.30361	-0.10407	1.19227	-1.3148	1.29613	-0.09924	1.18234	-1.17477		-3.65	-0.828187	-0.881965	-1.00288	-1.00049	-0.878143	-0.912699			5.8	-0.04315	-0.050794	-0.058076		5.775	-0.085348	-0.077534	-0.023858
0.385456	-0.00949	0.360696	-1.68656	1.35526	-0.11255	1.23992	-1.29763	1.34752	-0.10722	1.23027	-1.16015		-3.636	-0.820697	-0.877214	-0.994491	-0.996466	-0.870169	-0.908792			6	-0.067703	-0.079284	-0.101586		6.006	-0.118397	-0.123552	-0.045858
0.400332	-0.01015	0.374558	-1.68456	1.4069	-0.12127	1.28772	-1.28014	1.3989	-0.11553	1.27839	-1.14538		-3.622	-0.813263	-0.872541	-0.98615	-0.992489	-0.862261	-0.904973			6.2	-0.105346	-0.123444	-0.169097		6.237	-0.155176	-0.1739	-0.083858
0.415198	-0.01101	0.388406	-1.68266	1.45841	-0.13032	1.33559	-1.26241	1.45017	-0.12417	1.3266	-1.13043		-3.608	-0.805885	-0.867954	-0.977861	-0.988563	-0.854377	-0.901246			6.5	-0.153291	-0.179664	-0.247869		6.468	-0.19542	-0.228631	-0.136858
0.430062	-0.01177	0.402244	-1.68058	1.50991	-0.13971	1.3837	-1.24458	1.50143	-0.13315	1.37506	-1.11545		-3.594	-0.798564	-0.863456	-0.969622	-0.984692	-0.8464	-0.897614			6.7	-0.201961	-0.235976	-0.313266		6.699	-0.239913	-0.28728	-0.191858
0.444916	-0.01255	0.416068	-1.6784	1.5614	-0.14934	1.43207	-1.22664	1.55257	-0.14245	1.42366	-1.10049		-3.58	-0.791301	-0.859053	-0.961433	-0.980878	-0.838512	-0.89408			6.9	-0.242438	-0.281678	-0.35019		6.93	-0.288748	-0.345447	-0.249858
0.459759	-0.01343	0.429874	-1.67623	1.61267	-0.15929	1.48049	-1.20875	1.6037	-0.15198	1.47253	-1.08552		-3.566	-0.784097	-0.854747	-0.953295	-0.977125	-0.83071	-0.890645			7.2	-0.27272	-0.315232	-0.36454		7.161	-0.338864	-0.410461	-0.309858
0.474601	-0.01431	0.443672	-1.67397	1.66402	-0.16959	1.52927	-1.1908	1.65482	-0.16184	1.52163	-1.07052		-3.552	-0.776952	-0.850543	-0.945207	-0.973435	-0.822992	-0.887313			7.4	-0.296797	-0.342461	-0.374848		7.392	-0.388384	-0.478003	-0.386858
0.489411	-0.0152	0.457432	-1.67162	1.71526	-0.18021	1.57826	-1.17308	1.70583	-0.17203	1.57093	-1.05574		-3.538	-0.769866	-0.846444	-0.937169	-0.969811	-0.815359	-0.884084			7.6	-0.318209	-0.367871	-0.396334		7.623	-0.431125	-0.538502	-0.462858
0.50422	-0.0162	0.471186	-1.66928	1.76638	-0.19116	1.6275	-1.15563	1.75673	-0.18244	1.62045	-1.04114		-3.524	-0.762839	-0.84245	-0.929179	-0.966256	-0.807806	-0.880961			7.9	-0.335248	-0.38877	-0.430066		7.854	-0.456992	-0.592822	-0.538858
0.518997	-0.0171	0.484904	-1.66675	1.81749	-0.20233	1.67709	-1.13847	1.80762	-0.19327	1.67027	-1.02702		-3.51	-0.755871	-0.838566	-0.921238	-0.962771	-0.800333	-0.877946			8.1	-0.348541	-0.405301	-0.480103		8.085	-0.468399	-0.627678	-0.591858
0.533763	-0.01811	0.498598	-1.66424	1.86849	-0.21383	1.72701	-1.12197	1.85849	-0.20432	1.72049	-1.01345		-3.496	-0.748962	-0.834792	-0.913346	-0.959358	-0.792939	-0.875038			8.3	-0.361596	-0.421812	-0.543894		8.316	-0.484885	-0.656734	-0.633858
0.548486	-0.01912	0.512254	-1.66165	1.91947	-0.22564	1.77731	-1.10599	1.90926	-0.21559	1.77093	-1.00027		-3.482	-0.742113	-0.831129	-0.905502	-0.95602	-0.785621	-0.87224			8.5	-0.379859	-0.445309	-0.61075		8.547	-0.51171	-0.690592	-0.676858
0.563198	-0.02014	0.525885	-1.65897	1.97034	-0.23768	1.8279	-1.09057	1.95991	-0.22728	1.82163	-0.98782		-3.468	-0.735322	-0.827579	-0.897705	-0.952756	-0.778378	-0.869552			8.8	-0.411741	-0.486219	-0.676791		8.778	-0.540902	-0.727601	-0.722858
0.577878	-0.02116	0.539481	-1.65621	2.02119	-0.25013	1.87883	-1.07588	2.01055	-0.2392	1.87261	-0.97584		-3.454	-0.728589	-0.824142	-0.889955	-0.94957	-0.771208	-0.866975			9	-0.457297	-0.544072	-0.724971		9.009	-0.567366	-0.772039	-0.774858
0.592556	-0.02229	0.553069	-1.65347	2.07193	-0.26281	1.93001	-1.06175	2.06108	-0.25143	1.9238	-0.96445		-3.44	-0.721913	-0.820818	-0.882252	-0.946462	-0.76411	-0.864509			9.2	-0.508106	-0.607087	-0.744126		9.24	-0.594152	-0.804157	-0.807858
0.607213	-0.02342	0.566629	-1.65064	2.07193	-0.26281	1.93001	-1.06175	2.06108	-0.25143	1.9238	-0.96445		-3.426	-0.715295	-0.817608	-0.874595	-0.943433	-0.757083	-0.862155			9.5	-0.55972	-0.66852	-0.758911		9.471	-0.623037	-0.828456	-0.822858
0.621859	-0.02456	0.580172	-1.64773	2.12218	-0.27571	1.98109	-1.04839	2.11113	-0.26389	1.97478	-0.95372		-3.412	-0.708733	-0.814511	-0.866984	-0.940484	-0.750124	-0.859913			9.7	-0.608256	-0.723191	-0.789539		9.702	-0.650381	-0.851399	-0.850858
0.636494	-0.02571	0.593692	-1.64473	2.17228	-0.28891	2.03233	-1.03577	2.16103	-0.27655	2.02595	-0.94359		-3.398	-0.702227	-0.811527	-0.859418	-0.937615	-0.743232	-0.857783			9.9	-0.646221	-0.762188	-0.829827		9.933	-0.683584	-0.870533	-0.870858
0.651137	-0.02696	0.607219	-1.64173	2.22227	-0.30234	2.08374	-1.02376	2.21081	-0.28953	2.07726	-0.93408		-3.384	-0.695776	-0.808656	-0.851897	-0.934828	-0.736406	-0.855764			10.2	-0.671466	-0.784459	-0.873856		10.164	-0.728241	-0.901196	-0.890858
0.665771	-0.02811	0.620725	-1.63856	2.27224	-0.31598	2.13542	-1.01234	2.26059	-0.30273	2.12881	-0.92509		-3.37	-0.689378	-0.805895	-0.84442	-0.932124	-0.729644	-0.853857			10.4	-0.689297	-0.799075	-0.923452		10.395	-0.778797	-0.953912	-0.916858
0.680403	-0.02937	0.63422	-1.6354	2.32211	-0.33006	2.18727	-1.00175	2.31025	-0.31626	2.1805	-0.91674		-3.356	-0.683034	-0.803246	-0.836987	-0.929502	-0.722945	-0.852062			10.6	-0.703102	-0.812144	-0.974175		10.626	-0.827938	-1.00738	-0.955858
0.695034	-0.03064	0.647708	-1.63216	2.37185	-0.34435	2.23927	-0.9918	2.3598	-0.33	2.23231	-0.90896		-3.342	-0.676742	-0.800705	-0.829597	-0.926962	-0.716308	-0.850378			10.9	-0.714046	-0.825812	-1.02172		10.857	-0.867171	-1.06222	-1.00986
0.709665	-0.03201	0.66119	-1.62892	2.42159	-0.35896	2.2915	-0.98264	2.40935	-0.34417	2.28433	-0.90196		-3.328	-0.670502	-0.798273	-0.822251	-0.924506	-0.70973	-0.848804			11.1	-0.725411	-0.843679	-1.06418		11.088	-0.896189	-1.09694	-1.07486
0.724337	-0.03329	0.674697	-1.62549	2.47121	-0.3738	2.34385	-0.97416	2.45878	-0.35856	2.33645	-0.89556		-3.314	-0.664297	-0.795915	-0.814947	-0.922133	-0.703211	-0.847341			11.3	-0.743181	-0.871248	-1.09906		11.319	-0.931118	-1.14149	-1.12986
0.738997	-0.03468	0.688189	-1.62208	2.52072	-0.38896	2.39631	-0.96648	2.5081	-0.37317	2.38865	-0.88978		-3.3	-0.658121	-0.793622	-0.807675	-0.919856	-0.696749	-0.846004			11.5	-0.775302	-0.91534	-1.13324		11.55	-0.983733	-1.20233	-1.16686
0.753721	-0.03607	0.701728	-1.61857	2.57011	-0.40444	2.44886	-0.95961	2.55741	-0.3881	2.44103	-0.88472		-3.286	-0.651987	-0.791411	-0.800443	-0.917653	-0.690343	-0.84478			11.8	-0.827387	-0.980164	-1.18041		11.781	-1.0149	-1.25042	-1.19986
0.768443	-0.03746	0.715264	-1.61496	2.61949	-0.42015	2.50158	-0.953456	2.6065	-0.40335	2.49337	-0.880402		-3.272	-0.645894	-0.789281	-0.793251	-0.915525	-0.683992	-0.843655			12	-0.894036	-1.05787	-1.23858		12.012	-1.04418	-1.29226	-1.24686
0.783217	-0.03897	0.728831	-1.61136	2.66876	-0.43618	2.55437	-0.948131	2.65559	-0.41882	2.54586	-0.876725		-3.258	-0.639839	-0.78723	-0.786099	-0.913472	-0.677695	-0.842627			12.2	-0.959753	-1.13019	-1.28962		12.243	-1.05663	-1.31541	-1.31886
0.79799	-0.04047	0.742393	-1.60767	2.71791	-0.45243	2.60721	-0.943535	2.70466	-0.43462	2.59849	-0.873798		-3.244	-0.633824	-0.785258	-0.778987	-0.911493	-0.671449	-0.841697			12.5	-1.0166	-1.18918	-1.33148		12.474	-1.08266	-1.30449	-1.38086
0.812783	-0.04199	0.755969	-1.6039	2.76695	-0.46911	2.66008	-0.939869	2.75352	-0.45074	2.65104	-0.871619		-3.23	-0.627846	-0.783364	-0.771914	-0.909589	-0.665254	-0.840863			12.7	-1.06429	-1.23554	-1.36678		12.705	-1.11659	-1.32244	-1.37286
0.827586	-0.04351	0.769544	-1.60003	2.81597	-0.48591	2.71308	-0.936839	2.80238	-0.46708	2.70371	-0.8701		-3.216	-0.621905	-0.781546	-0.764881	-0.907761	-0.659109	-0.840125			12.9	-1.09968	-1.26555	-1.38903		12.936	-1.11986	-1.35532	-1.33286
0.842388	-0.04503	0.783109	-1.59608	2.86478	-0.50314	2.76598	-0.934751	2.85111	-0.48365	2.75637	-0.869244		-3.202	-0.616001	-0.779803	-0.757886	-0.906007	-0.653013	-0.839483			13.2	-1.12132	-1.27847	-1.40158		13.167	-1.12941	-1.36651	-1.31986
0.857189	-0.04667	0.796666	-1.59215	2.91358	-0.52059	2.81897	-0.9334	2.89974	-0.50064	2.80902	-0.869253		-3.188	-0.610132	-0.778136	-0.750931	-0.90433	-0.646964	-0.838935			13.4	-1.13162	-1.27944	-1.41129		13.398	-1.16649	-1.38796	-1.33486
0.871968	-0.0483	0.8102	-1.58814	2.96226	-0.53836	2.87195	-0.932886	2.94825	-0.51785	2.86165	-0.869924		-3.174	-0.604298	-0.776543	-0.744013	-0.902728	-0.640961	-0.838482			13.6	-1.13414	-1.27481	-1.42651		13.629	-1.20496	-1.41561	-1.34886
0.886746	-0.04994	0.823723	-1.58406	3.01082	-0.55636	2.92488	-0.933108	2.99665	-0.53529	2.91424	-0.871262		-3.16	-0.598499	-0.775024	-0.737134	-0.901202	-0.635004	-0.838124			13.9	-1.12906	-1.26655	-1.45117		13.86	-1.21244	-1.41012	-1.39086
0.90148	-0.05159	0.8372	-1.57991	3.05926	-0.57469	2.97778	-0.934171	3.04503	-0.55305	2.96689	-0.873371		-3.146	-0.592733	-0.773578	-0.730293	-0.899752	-0.62909	-0.837858			14.1	-1.11754	-1.25752	-1.48213		14.091	-1.23027	-1.40066	-1.42886
0.916203	-0.05334	0.850656	-1.57578	3.10769	-0.59334	3.03072	-0.936066	3.09321	-0.57113	3.01938	-0.876246		-3.132	-0.587001	-0.772205	-0.72349	-0.898378	-0.62322	-0.837686			14.3	-1.10916	-1.25834	-1.51864		14.322	-1.22586	-1.441	-1.45386
0.930841	-0.05499	0.864029	-1.57149	3.15591	-0.61222	3.08349	-0.938689	3.14136	-0.58944	3.0719	-0.879783		-3.118	-0.581301	-0.770904	-0.716724	-0.897081	-0.617392	-0.837607			14.6	-1.11366	-1.2765	-1.55247		14.553	-1.2556	-1.46383	-1.47886
0.945477	-0.05675	0.877398	-1.56724	3.204	-0.63132	3.13618	-0.94204	3.18941	-0.60808	3.12434	-0.884084		-3.104	-0.575634	-0.769674	-0.709996	-0.89586	-0.611573	-0.83762			14.8	-1.13498	-1.31199	-1.57717		14.784	-1.28452	-1.48175	-1.47186
0.960112	-0.05852	0.890759	-1.56291	3.25208	-0.65085	3.18888	-0.94631	3.23734	-0.62694	3.1767	-0.889047		-3.09	-0.569999	-0.768516	-0.703306	-0.894717	-0.605757	-0.837725			15	-1.16992	-1.35824	-1.59134		15.015	-1.28585	-1.49594	-1.46686
0.974736	-0.06029	0.9041	-1.55849	3.29994	-0.67061	3.24138	-0.95129	3.28505	-0.64612	3.22886	-0.89476		-3.076	-0.564395	-0.767429	-0.696652	-0.893651	-0.599974	-0.837922			15.2	-1.21215	-1.40698	-1.59907		15.246	-1.30043	-1.53418	-1.49486
0.989443	-0.06217	0.917513	-1.55407	3.34778	-0.6906	3.29386	-0.95698	3.33275	-0.66563	3.28101	-0.90123		-3.062	-0.558822	-0.766413	-0.690035	-0.892661	-0.594225	-0.83821			15.5	-1.25571	-1.45171	-1.60704		15.477	-1.32216	-1.55571	-1.55086
1.00415	-0.06405	0.930922	-1.54958	3.39551	-0.71091	3.34622	-0.96348	3.38033	-0.68537	3.33304	-0.90835		-3.048	-0.55328	-0.765467	-0.683456	-0.89175	-0.588509	-0.838588			15.7	-1.29265	-1.48466	-1.61117		15.708	-1.30429	-1.53902	-1.61686
1.0189	-0.06594	0.944364	-1.545	3.44301	-0.73156	3.39836	-0.97077	3.4279	-0.70534	3.38505	-0.91611		-3.034	-0.547768	-0.764591	-0.676913	-0.890916	-0.582826	-0.839057			15.9	-1.32014	-1.50414	-1.61527		15.939	-1.30226	-1.57344	-1.65986
1.03364	-0.06783	0.957796	-1.54033	3.4905	-0.75243	3.45045	-0.97874	3.47525	-0.72563	3.43683	-0.92461		-3.02	-0.542286	-0.763785	-0.670406	-0.89016	-0.577176	-0.839617			16.2	-1.34137	-1.51412	-1.62907		16.17	-1.31443	-1.58411	-1.63686
1.04839	-0.06983	0.971226	-1.53569	3.53776	-0.77363	3.50229	-0.98749	3.52249	-0.74625	3.48846	-0.93384		-3.006	-0.536833	-0.763049	-0.663936	-0.889482	-0.571558	-0.840266			16.4	-1.35381	-1.51237	-1.64577		16.401	-1.3377	-1.56883	-1.59386
1.06311	-0.07174	0.984632	-1.53088	3.58501	-0.79506	3.55407	-0.99692	3.5696	-0.7671	3.53995	-0.94369		-2.992	-0.53141	-0.762382	-0.657502	-0.888882	-0.565973	-0.841004			16.6	-1.35153	-1.49546	-1.65765		16.632	-1.35409	-1.57402	-1.57486
1.07786	-0.07375	0.998066	-1.52611	3.63203	-0.81682	3.60559	-1.0071	3.6166	-0.78827	3.59128	-0.95426		-2.978	-0.526016	-0.761785	-0.651104	-0.88836	-0.56042	-0.841832			16.9	-1.3327	-1.46604	-1.66086		16.863	-1.35265	-1.55307	-1.56086
1.09251	-0.07576	1.0114	-1.52128	3.67903	-0.83881	3.65705	-1.01794	3.66348	-0.80968	3.64244	-0.96544		-2.964	-0.520651	-0.761258	-0.644742	-0.887917	-0.554898	-0.842748			17.1	-1.30045	-1.43037	-1.6521		17.094	-1.3127	-1.54355	-1.53286
1.10715	-0.07788	1.02473	-1.51651	3.72581	-0.86113	3.70822	-1.02952	3.71025	-0.83131	3.69344	-0.97722		-2.95	-0.515315	-0.7608	-0.638416	-0.887552	-0.549408	-0.843752			17.3	-1.25948	-1.39372	-1.63044		17.325	-1.30806	-1.50741	-1.52786
1.1218	-0.0799	1.03805	-1.51155	3.77247	-0.88378	3.75921	-1.04183	3.75679	-0.85328	3.74417	-0.98971		-2.936	-0.510007	-0.760411	-0.632126	-0.887267	-0.54395	-0.844845			17.6	-1.21286	-1.35803	-1.59252		17.556	-1.29057	-1.46018	-1.52386
1.13633	-0.08202	1.05127	-1.50666	3.81901	-0.90657	3.81001	-1.05467	3.80332	-0.87557	3.79481	-1.00288		-2.922	-0.504728	-0.760092	-0.625871	-0.887059	-0.538523	-0.846025			17.8	-1.16291	-1.32278	-1.53724		17.787	-1.256	-1.45419	-1.50886
1.15097	-0.08415	1.06459	-1.5017	3.86542	-0.92978	3.86061	-1.06832	3.84972	-0.89809	3.84527	-1.01663		-2.908	-0.499476	-0.759842	-0.619652	-0.886931	-0.533127	-0.847293			18	-1.11203	-1.28631	-1.47086		18.018	-1.23732	-1.43756	-1.50986
1.1655	-0.08629	1.07782	-1.49669	3.91171	-0.95323	3.91102	-1.08259	3.8959	-0.92095	3.89544	-1.03106		-2.894	-0.494253	-0.759661	-0.613469	-0.886882	-0.527761	-0.848647			18.2	-1.0631	-1.24823	-1.40611		18.249	-1.23477	-1.43248	-1.50186
1.18004	-0.08843	1.09104	-1.49162	3.95787	-0.97691	3.96122	-1.09744	3.94207	-0.94404	3.94552	-1.04605		-2.88	-0.489057	-0.759549	-0.607321	-0.886912	-0.522426	-0.850089			18.5	-1.01624	-1.20696	-1.34943		18.48	-1.19746	-1.39788	-1.47586
1.19447	-0.09057	1.10415	-1.48647	4.00381	-1.00093	4.01111	-1.11299	3.98801	-0.96736	3.99529	-1.06161		-2.866	-0.483889	-0.759507	-0.601208	-0.887021	-0.517122	-0.851616			18.7	-0.969866	-1.15992	-1.30017		18.711	-1.12278	-1.37329	-1.46386
1.209	-0.09282	1.11737	-1.48138	4.04962	-1.02528	4.06079	-1.12922	4.03383	-0.99101	4.04486	-1.07781		-2.852	-0.478749	-0.759533	-0.59513	-0.887209	-0.511848	-0.853229			18.9	-0.923221	-1.10545	-1.2539		18.942	-1.06329	-1.30558	-1.43886
1.22363	-0.09507	1.13069	-1.47619	4.09531	-1.04986	4.11026	-1.14601	4.07953	-1.01499	4.09423	-1.09466		-2.838	-0.473636	-0.759629	-0.589087	-0.887476	-0.506604	-0.854928			19.2	-0.873832	-1.0404	-1.19877		19.173	-1.01307	-1.23504	-1.38686
1.23826	-0.09733	1.14401	-1.47092	4.14087	-1.07468	4.15951	-1.16337	4.1251	-1.03921	4.14339	-1.11204		-2.824	-0.46855	-0.759795	-0.583079	-0.887822	-0.50139	-0.856712			19.4	-0.819962	-0.964336	-1.13014		19.404	-0.982793	-1.1515	-1.31986
1.25289	-0.0997	1.15733	-1.46566	4.1863	-1.09983	4.20853	-1.18137	4.17045	-1.06366	4.19223	-1.12995		-2.81	-0.463492	-0.760029	-0.577106	-0.888247	-0.496205	-0.85858			19.6	-0.761002	-0.880117	-1.04944		19.635	-0.943925	-1.08376	-1.23686
1.26753	-0.10207	1.17065	-1.46034	4.2315	-1.12522	4.25723	-1.19992	4.21578	-1.08845	4.24096	-1.14849		-2.796	-0.458461	-0.760333	-0.571168	-0.888752	-0.49105	-0.860533			19.9	-0.695726	-0.790956	-0.955663		19.866	-0.882796	-1.03787	-1.17086
1.28226	-0.10445	1.18407	-1.45496	4.27668	-1.15095	4.30581	-1.21911	4.26088	-1.11347	4.28937	-1.16753		-2.782	-0.453457	-0.760707	-0.565265	-0.889335	-0.485925	-0.862569			20.1	-0.62696	-0.704659	-0.858963		20.097	-0.818393	-0.992037	-1.11886
1.29689	-0.10683	1.1974	-1.44951	4.32162	-1.17691	4.35406	-1.23882	4.30585	-1.13883	4.33755	-1.18719		-2.768	-0.448481	-0.76115	-0.559396	-0.889997	-0.480829	-0.864689			20.3	-0.560502	-0.630469	-0.775315		20.328	-0.740501	-0.940814	-1.04786
1.31151	-0.10922	1.21073	-1.44402	4.36633	-1.20321	4.40197	-1.25915	4.3506	-1.16442	4.38542	-1.20734		-2.754	-0.443531	-0.761662	-0.553562	-0.890738	-0.475762	-0.866892			20.6	-0.499073	-0.570403	-0.710679		20.559	-0.651539	-0.851544	-0.988858
1.32614	-0.11171	1.22407	-1.4386	4.41102	-1.22974	4.44975	-1.27999	4.39532	-1.19024	4.43316	-1.22798		-2.74	-0.438609	-0.762243	-0.547762	-0.891558	-0.470725	-0.869177			20.8	-0.444161	-0.522135	-0.664414		20.79	-0.58789	-0.765659	-0.920858
1.34076	-0.1142	1.23742	-1.43317	4.45547	-1.25652	4.4972	-1.30133	4.43982	-1.21641	4.48058	-1.24921		-2.726	-0.433713	-0.762894	-0.541997	-0.892457	-0.465716	-0.871545			21	-0.396407	-0.481457	-0.623165		21.021	-0.532273	-0.668394	-0.824858
1.35527	-0.11659	1.25069	-1.4276	4.49969	-1.28363	4.54432	-1.32326	4.48418	-1.24291	4.52776	-1.27102		-2.712	-0.428845	-0.763615	-0.536266	-0.893434	-0.460736	-0.873994			21.3	-0.352875	-0.440301	-0.562259		21.252	-0.494242	-0.57908	-0.731858
1.36979	-0.11919	1.26395	-1.42216	4.54388	-1.31108	4.5913	-1.34578	4.52832	-1.26955	4.57462	-1.2932		-2.698	-0.424003	-0.764405	-0.530569	-0.89449	-0.455785	-0.876524			21.5	-0.313245	-0.395421	-0.479829		21.483	-0.468812	-0.52232	-0.639858
1.38431	-0.1217	1.27722	-1.41655	4.58783	-1.33868	4.63794	-1.36868	4.57232	-1.29653	4.62125	-1.31594		-2.684	-0.419189	-0.765264	-0.524906	-0.895623	-0.450862	-0.879134			21.7	-0.279424	-0.349007	-0.394814		21.714	-0.422155	-0.467685	-0.574858
1.39892	-0.12431	1.29059	-1.41096	4.63164	-1.36661	4.68434	-1.39215	4.6162	-1.32384	4.66764	-1.33924		-2.67	-0.414402	-0.766192	-0.519277	-0.896835	-0.445968	-0.881825			21.9	-0.247732	-0.298787	-0.316923		21.945	-0.379755	-0.403899	-0.537858
1.41354	-0.12693	1.30398	-1.40532	4.67523	-1.39488	4.7304	-1.41619	4.65994	-1.3513	4.7138	-1.3629		-2.656	-0.409642	-0.76719	-0.513683	-0.898124	-0.441102	-0.884596			22.2	-0.214459	-0.244045	-0.256235		22.176	-0.336896	-0.33752	-0.489858
1.42825	-0.12955	1.31749	-1.39964	4.71867	-1.4234	4.77622	-1.44069	4.70345	-1.37919	4.75963	-1.3872		-2.642	-0.404909	-0.768258	-0.508122	-0.899491	-0.436264	-0.887445			22.4	-0.180855	-0.191296	-0.2237		22.407	-0.290822	-0.279539	-0.404858
1.44287	-0.13217	1.33089	-1.3939	4.76198	-1.45215	4.82181	-1.46564	4.74683	-1.40723	4.80522	-1.41183		-2.628	-0.400203	-0.769394	-0.502595	-0.900935	-0.431455	-0.890373			22.6	-0.147963	-0.146382	-0.210762		22.638	-0.258348	-0.225067	-0.311858
1.45738	-0.1349	1.3442	-1.38825	4.80505	-1.48125	4.86705	-1.49114	4.78997	-1.4356	4.85048	-1.43701		-2.614	-0.395524	-0.7706	-0.497102	-0.902456	-0.426674	-0.893378			22.9	-0.113134	-0.108165	-0.190641		22.869	-0.243178	-0.173491	-0.259858
1.47198	-0.13763	1.35765	-1.38257	4.84788	-1.51059	4.91195	-1.51708	4.83298	-1.46421	4.8955	-1.46261		-2.6	-0.390873	-0.771875	-0.491643	-0.904053	-0.42192	-0.896461			23.1	-0.074523	-0.073241	-0.143285		23.1	-0.231739	-0.132098	-0.243858
1.48639	-0.14026	1.3709	-1.3768	4.89066	-1.54018	4.9567	-1.54345	4.87586	-1.49317	4.94029	-1.48873		-2.586	-0.386248	-0.773219	-0.486217	-0.905727	-0.417195	-0.899621			23.3	-0.039306	-0.046511	-0.082622		23.331	-0.220749	-0.119718	-0.226858
1.50089	-0.143	1.38427	-1.37108	4.93321	-1.5701	5.00112	-1.57035	4.91849	-1.52227	4.98474	-1.51517		-2.572	-0.381651	-0.774631	-0.480825	-0.907477	-0.412498	-0.902856			23.6	-0.015485	-0.03246	-0.030577		23.562	-0.198923	-0.135554	-0.191858
1.51538	-0.14584	1.39765	-1.36544	4.97552	-1.60028	5.04519	-1.59768	4.96099	-1.5518	5.02895	-1.54223		-2.558	-0.377081	-0.776113	-0.475467	-0.909302	-0.407828	-0.906168			23.8	-0.002679	-0.025632	0.004709		23.793	-0.173337	-0.150539	-0.151858
1.52978	-0.14858	1.41096	-1.3597	5.01768	-1.63069	5.08902	-1.62542	5.00325	-1.58149	5.07282	-1.56959		-2.544	-0.372539	-0.777663	-0.470142	-0.911203	-0.403186	-0.909554			24	0.004647	-0.016713	0.020818		24.024	-0.153753	-0.143431	-0.118858
1.54427	-0.15143	1.42438	-1.35401	5.0596	-1.66146	5.1325	-1.65368	5.04538	-1.61151	5.11646	-1.59745		-2.53	-0.368024	-0.779281	-0.46485	-0.913179	-0.398572	-0.913014			24.3	0.010538	-0.001682	0.019807		24.255	-0.143113	-0.12394	-0.092858
1.55867	-0.15428	1.43773	-1.34829	5.10137	-1.69247	5.17574	-1.68235	5.08736	-1.64177	5.15986	-1.62571		-2.516	-0.363536	-0.780968	-0.459592	-0.915228	-0.393985	-0.916547			24.5	0.014662	0.015489	0.008512		24.486	-0.138527	-0.101955	-0.063858
1.57316	-0.15714	1.45118	-1.34249	5.143	-1.72372	5.21873	-1.71142	5.1291	-1.67228	5.20291	-1.65436		-2.502	-0.359076	-0.782723	-0.454366	-0.917352	-0.389426	-0.920154			24.7	0.016938	0.030092	0.002033		24.717	-0.132615	-0.084151	-0.034858
1.58776	-0.1601	1.46475	-1.33674	5.18438	-1.75533	5.26138	-1.74099	5.17059	-1.70314	5.24563	-1.6835		-2.488	-0.354643	-0.784546	-0.449174	-0.91955	-0.384894	-0.923832			24.9	0.018183	0.039077	0.010133		24.948	-0.12354	-0.070935	-0.021858
1.60235	-0.16297	1.47834	-1.33084	5.2255	-1.78718	5.30369	-1.77096	5.21195	-1.73423	5.28811	-1.71302		-2.474	-0.350238	-0.786436	-0.444016	-0.92182	-0.38039	-0.927582			25.2	0.020219	0.042226	0.032075		25.179	-0.112578	-0.06532	-0.029858
1.61684	-0.16594	1.49186	-1.32504	5.26648	-1.81927	5.34574	-1.80132	5.25306	-1.76557	5.33025	-1.74292		-2.46	-0.345861	-0.788394	-0.43889	-0.924163	-0.375913	-0.931402			25.4	0.023072	0.039415	0.053127		25.41	-0.09951	-0.067391	-0.052858
1.63133	-0.16892	1.5054	-1.31925	5.30721	-1.85162	5.38745	-1.83206	5.29402	-1.79716	5.37215	-1.7732		-2.446	-0.341511	-0.790418	-0.433797	-0.926578	-0.371463	-0.935293			25.6	0.023824	0.029359	0.053058		25.641	-0.087981	-0.07936	-0.068858
1.64592	-0.17199	1.51906	-1.31351	5.34779	-1.88432	5.42891	-1.86329	5.33484	-1.82908	5.41381	-1.80394		-2.432	-0.337189	-0.79251	-0.428737	-0.929064	-0.36704	-0.939252			25.9	0.022827	0.016584	0.035442		25.872	-0.084232	-0.088056	-0.064858
1.6603	-0.17497	1.53253	-1.30772	5.38811	-1.91726	5.47003	-1.8949	5.37541	-1.86125	5.45513	-1.83506		-2.418	-0.332895	-0.794668	-0.42371	-0.931621	-0.362645	-0.94328			26.1	0.020948	0.006636	0.014596		26.103	-0.08937	-0.093315	-0.044858
1.67468	-0.17805	1.54605	-1.30203	5.42818	-1.95046	5.51079	-1.92688	5.41574	-1.89367	5.49611	-1.86653		-2.404	-0.328629	-0.796892	-0.418715	-0.934249	-0.358277	-0.947375			26.3	0.017682	0.001851	0.001193		26.334	-0.100437	-0.093098	-0.026858
1.68917	-0.18114	1.55969	-1.29629	5.46809	-1.9839	5.55131	-1.95924	5.45591	-1.92633	5.53685	-1.89837		-2.39	-0.324391	-0.799182	-0.413754	-0.936946	-0.353936	-0.951537			26.6	0.013707	0.003307	0.001772		26.565	-0.106261	-0.077052	-0.027858
1.70365	-0.18423	1.57335	-1.2905	5.50774	-2.0177	5.59148	-1.99206	5.49584	-1.95934	5.57725	-1.93065		-2.376	-0.32018	-0.801537	-0.408824	-0.939712	-0.349622	-0.955765			26.8	0.010047	0.009547	0.012611		26.796	-0.107479	-0.05405	-0.044858
1.71823	-0.18743	1.58713	-1.2848	5.54724	-2.05175	5.63139	-2.02525	5.53551	-1.99249	5.6173	-1.96318		-2.362	-0.315998	-0.803957	-0.403928	-0.942547	-0.345335	-0.960058			27	0.008648	0.01839	0.028469		27.027	-0.100123	-0.037524	-0.062858
1.73271	-0.19052	1.60086	-1.27903	5.58647	-2.08604	5.67096	-2.05881	5.57503	-2.02598	5.65712	-1.99617		-2.348	-0.311844	-0.806442	-0.399064	-0.945449	-0.341075	-0.964415			27.3	0.010431	0.026996	0.040646		27.258	-0.092052	-0.030061	-0.058858
1.74718	-0.19372	1.61461	-1.27341	5.62545	-2.12059	5.71017	-2.09272	5.6143	-2.05972	5.69659	-2.0295		-2.334	-0.307718	-0.80899	-0.394232	-0.948419	-0.336842	-0.968835			27.5	0.012946	0.03058	0.037311		27.489	-0.081905	-0.030249	-0.036858
1.76155	-0.19692	1.6283	-1.26778	5.66426	-2.15539	5.74913	-2.12698	5.65341	-2.0937	5.73583	-2.06316		-2.32	-0.30362	-0.811603	-0.389433	-0.951454	-0.332636	-0.973318			27.7	0.012145	0.024793	0.015923		27.72	-0.073873	-0.033536	-0.015858
1.77592	-0.20013	1.64202	-1.2622	5.7028	-2.19055	5.78773	-2.1617	5.69226	-2.12803	5.77471	-2.09726		-2.306	-0.29955	-0.814279	-0.384666	-0.954556	-0.328456	-0.977862			28	0.007724	0.011571	-0.009301		27.951	-0.06942	-0.033327	-0.003858
1.79029	-0.20343	1.65576	-1.25668	5.74108	-2.22595	5.82599	-2.19676	5.73086	-2.16249	5.81326	-2.13158		-2.292	-0.295508	-0.817017	-0.379931	-0.957722	-0.324304	-0.982467			28.2	0.003312	-0.001878	-0.019991		28.182	-0.067387	-0.031774	0.002142
1.80465	-0.20664	1.66952	-1.25108	5.77919	-2.26161	5.86398	-2.23217	5.76931	-2.19731	5.85158	-2.16634		-2.278	-0.291495	-0.819817	-0.375228	-0.960952	-0.320178	-0.987131			28.4	0.000715	-0.011087	-0.014136		28.413	-0.063884	-0.028495	0.009142
1.81902	-0.20995	1.68333	-1.24563	5.81694	-2.29751	5.90153	-2.26792	5.80749	-2.23236	5.88954	-2.20142		-2.264	-0.287511	-0.822679	-0.370557	-0.964246	-0.31608	-0.991854			28.6	-0.000799	-0.015371	-0.000791		28.644	-0.055886	-0.027793	0.016142
1.83338	-0.21327	1.69717	-1.24014	5.85451	-2.33367	5.93881	-2.30401	5.84542	-2.26765	5.92717	-2.23682		-2.25	-0.283554	-0.825602	-0.365918	-0.967602	-0.312008	-0.996635			28.9	-0.004033	-0.017135			28.875	-0.047738	-0.030073	0.017142
1.84785	-0.21669	1.71113	-1.23474	5.89192	-2.37008	5.97584	-2.34043	5.88318	-2.30319	5.96455	-2.27253		-2.236	-0.279627	-0.828586	-0.361312	-0.971021	-0.307963	-1.00147			29.1	-0.008564	-0.015918			29.106	-0.044359	-0.033056	0.009142
1.86231	-0.22002	1.72513	-1.22924	5.92895	-2.40684	6.01241	-2.37729	5.92068	-2.33897	6.00159	-2.30856		-2.222	-0.275727	-0.831629	-0.356737	-0.9745	-0.303944	-1.00637			29.3	-0.011566	-0.010079			29.337	-0.042696	-0.030877	0.002142
1.87678	-0.22344	1.73917	-1.22389	5.9658	-2.44375	6.04872	-2.41437	5.95792	-2.37498	6.03829	-2.34489		-2.208	-0.271856	-0.834732	-0.352193	-0.978039	-0.299953	-1.01131			29.6	-0.011855	-0.001685			29.568	-0.044175	-0.024821	0.003142
1.89114	-0.22687	1.75315	-1.21859	6.00238	-2.48101	6.08468	-2.45187	5.9949	-2.41133	6.07465	-2.38162		-2.194	-0.268014	-0.837892	-0.347682	-0.981637	-0.295988	-1.01632			29.8	-0.006965	0.008535			29.799	-0.044258	-0.014879	0.009142
1.90559	-0.2303	1.76726	-1.21331	6.03869	-2.51852	6.12027	-2.4897	6.03172	-2.44782	6.11077	-2.41855		-2.18	-0.264201	-0.841111	-0.343202	-0.985294	-0.29205	-1.02137			30	0.002517	0.017795			30.03	-0.044286	-0.002106	0.015142
1.91985	-0.23383	1.7812	-1.2082	6.07482	-2.55628	6.15561	-2.52784	6.06827	-2.48465	6.14655	-2.45588		-2.166	-0.260416	-0.844387	-0.338753	-0.989008	-0.288138	-1.02648			30.3	0.013267	0.022586			30.261	-0.043708	0.009138	0.021142
1.9342	-0.23727	1.79528	-1.20305	6.11056	-2.59418	6.19048	-2.56619	6.10455	-2.52161	6.18199	-2.49339		-2.152	-0.256659	-0.847719	-0.334336	-0.992779	-0.284253	-1.03164			30.5	0.022941	0.023315			30.492	-0.042156	0.013096	0.027142
1.94855	-0.24081	1.8094	-1.19797	6.14613	-2.63243	6.2251	-2.60495	6.14057	-2.5589	6.21709	-2.53129		-2.138	-0.252932	-0.851107	-0.329951	-0.996605	-0.280395	-1.03684			30.7	0.028744	0.021015			30.723	-0.041438	0.00791	0.031142
1.96301	-0.24435	1.82365	-1.19294	6.18142	-2.67092	6.25935	-2.64401	6.17643	-2.59642	6.25195	-2.56947		-2.124	-0.249233	-0.85455	-0.325596	-1.00049	-0.276563	-1.0421			31	0.029412	0.017552			30.954	-0.042375	-0.003073	0.030142
1.97736	-0.24799	1.83784	-1.18804	6.21642	-2.70976	6.29324	-2.68347	6.21192	-2.63407	6.28638	-2.60782		-2.11	-0.245563	-0.858047	-0.321273	-1.00442	-0.272758	-1.0474			31.2	0.02533	0.014605			31.185	-0.044225	-0.01316	0.025142
1.99171	-0.25154	1.85206	-1.18308	6.25124	-2.74874	6.32688	-2.72313	6.24724	-2.67205	6.32057	-2.64655		-2.096	-0.241921	-0.861597	-0.316981	-1.00841	-0.26898	-1.05275			31.4	0.018768	0.01379			31.416	-0.043744	-0.02033	0.018142
2.00605	-0.25518	1.86631	-1.1783	6.28568	-2.78795	6.36005	-2.76307	6.28229	-2.71025	6.35443	-2.68554		-2.082	-0.238309	-0.8652	-0.312721	-1.01245	-0.265228	-1.05814			31.6	0.012488	0.015746			31.647	-0.041556	-0.02156	0.018142
2.0203	-0.25883	1.8805	-1.17357	6.31994	-2.8274	6.39297	-2.80329	6.31708	-2.74868	6.38795	-2.72478		-2.068	-0.234725	-0.868854	-0.308491	-1.01654	-0.261503	-1.06358			31.9	0.006928	0.017727			31.878	-0.035474	-0.023181	0.026142
2.03454	-0.26238	1.89471	-1.1688	6.3538	-2.86709	6.42542	-2.8438	6.3517	-2.78722	6.42124	-2.76418		-2.054	-0.23117	-0.872559	-0.304292	-1.02068	-0.257805	-1.06906			32.1	0.001558	0.016141			32.109	-0.029452	-0.023686	0.038142
2.04878	-0.26613	1.90896	-1.16427	6.38749	-2.907	6.45762	-2.88457	6.38596	-2.82608	6.4541	-2.80393		-2.04	-0.227643	-0.876314	-0.300124	-1.02487	-0.254133	-1.07458
2.06302	-0.26979	1.92325	-1.15964	6.42089	-2.94714	6.48947	-2.9256	6.42005	-2.86516	6.48674	-2.84392		-2.026	-0.224146	-0.880118	-0.295987	-1.0291	-0.250487	-1.08015
2.07735	-0.27354	1.93766	-1.15515	6.45401	-2.98751	6.52095	-2.9669	6.45387	-2.90444	6.51905	-2.88414		-2.012	-0.220677	-0.883971	-0.29188	-1.03338	-0.246869	-1.08575
2.09169	-0.27731	1.9521	-1.15064	6.48674	-3.0281	6.55199	-3.00844	6.48733	-2.94383	6.55094	-2.92448		-1.998	-0.217238	-0.88787	-0.287805	-1.03771	-0.243276	-1.09139
2.10613	-0.28108	1.96667	-1.14617	6.51929	-3.0689	6.58278	-3.05023	6.52063	-2.98352	6.5826	-2.96515		-1.984	-0.213827	-0.891815	-0.283759	-1.04209	-0.239711	-1.09707
2.10613	-0.28108	1.96667	-1.14617	6.55156	-3.10991	6.61322	-3.09224	6.55367	-3.02331	6.61396	-3.00593		-1.97	-0.210445	-0.895806	-0.279745	-1.0465	-0.236172	-1.10278
2.12044	-0.28501	1.98121	-1.14195	6.58365	-3.15113	6.64342	-3.13448	6.58644	-3.06339	6.64499	-3.04702		-1.956	-0.207091	-0.899841	-0.27576	-1.05096	-0.232659	-1.10853
2.13478	-0.28878	1.99575	-1.13762	6.61536	-3.19254	6.67318	-3.17694	6.61906	-3.10356	6.67583	-3.0882		-1.942	-0.203767	-0.90392	-0.271806	-1.05546	-0.229173	-1.11431
2.14901	-0.29265	2.01021	-1.13343	6.6468	-3.23405	6.7026	-3.2195	6.65132	-3.14392	6.70625	-3.12957		-1.928	-0.200471	-0.90804	-0.267883	-1.06	-0.225714	-1.12013
2.16324	-0.29653	2.02469	-1.12929	6.67796	-3.27584	6.7317	-3.26235	6.68333	-3.18445	6.73639	-3.17112		-1.914	-0.197204	-0.912202	-0.263989	-1.06458	-0.222281	-1.12597
2.17747	-0.30051	2.03921	-1.12529	6.70885	-3.31772	6.76048	-3.30528	6.71508	-3.22516	6.76622	-3.21283		-1.9	-0.193966	-0.916404	-0.260126	-1.0692	-0.218874	-1.13185
2.1918	-0.30438	2.05385	-1.12124	6.73948	-3.35986	6.78895	-3.34847	6.74669	-3.26603	6.79588	-3.2547		-1.886	-0.190756	-0.920645	-0.256293	-1.07385	-0.215495	-1.13776
2.20603	-0.30837	2.06841	-1.11733	6.76985	-3.40206	6.81712	-3.39173	6.77795	-3.30706	6.82515	-3.29672		-1.872	-0.187576	-0.924924	-0.252489	-1.07854	-0.212141	-1.14369
2.22025	-0.31225	2.083	-1.11336	6.79995	-3.44441	6.84499	-3.43511	6.80897	-3.34814	6.85415	-3.33877		-1.858	-0.184424	-0.92924	-0.248716	-1.08326	-0.208815	-1.14965
2.23447	-0.31634	2.09762	-1.10963	6.82982	-3.48691	6.87257	-3.47862	6.83986	-3.38946	6.88299	-3.38105		-1.844	-0.1813	-0.933592	-0.244973	-1.08802	-0.205514	-1.15563
2.2486	-0.32033	2.11216	-1.10585	6.85943	-3.52943	6.89989	-3.52213	6.87041	-3.43082	6.91147	-3.42334		-1.83	-0.178206	-0.937979	-0.241259	-1.09281	-0.202241	-1.16164
2.26282	-0.32432	2.12682	-1.10211	6.88882	-3.57217	6.92694	-3.56584	6.90074	-3.47231	6.93971	-3.46573		-1.816	-0.17514	-0.942399	-0.237575	-1.09763	-0.198994	-1.16766
2.27704	-0.32841	2.1415	-1.09852	6.91787	-3.61491	6.95366	-3.6095	6.93085	-3.51392	6.96771	-3.50821		-1.802	-0.172102	-0.946851	-0.233921	-1.10248	-0.195773	-1.17372
2.29125	-0.33251	2.15621	-1.09496	6.94681	-3.65775	6.98024	-3.65322	6.96074	-3.55554	6.99548	-3.55065		-1.788	-0.169093	-0.951335	-0.230296	-1.10736	-0.192579	-1.17978
2.30547	-0.33661	2.17094	-1.09145	6.97544	-3.70066	7.00652	-3.69695	6.99052	-3.59735	7.02314	-3.59324		-1.774	-0.166113	-0.955849	-0.226701	-1.11226	-0.189411	-1.18587
2.31958	-0.34081	2.18559	-1.08809	7.00397	-3.74362	7.0327	-3.74069	7.02	-3.63916	7.05051	-3.63578		-1.76	-0.163161	-0.960392	-0.223135	-1.11719	-0.18627	-1.19198
2.3338	-0.34492	2.20036	-1.08468	7.03222	-3.78651	7.0586	-3.78429	7.04929	-3.68104	7.07768	-3.67834		-1.746	-0.160238	-0.964963	-0.219599	-1.12215	-0.183156	-1.1981
2.34791	-0.34912	2.21505	-1.08141	7.0603	-3.82945	7.08436	-3.82786	7.07828	-3.72287	7.10458	-3.7208		-1.732	-0.157343	-0.96956	-0.216092	-1.12713	-0.180068	-1.20424
2.36212	-0.35333	2.22986	-1.07819	7.08821	-3.87236	7.10999	-3.87132	7.1072	-3.76486	7.13141	-3.76334		-1.718	-0.154476	-0.974183	-0.212614	-1.13213	-0.177006	-1.21039
2.37623	-0.35755	2.24459	-1.07501	7.11598	-3.91513	7.13551	-3.91457	7.13595	-3.80677	7.1581	-3.80574		-1.704	-0.151638	-0.978829	-0.209166	-1.13715	-0.173971	-1.21655
2.39043	-0.36176	2.25944	-1.07188	7.14362	-3.9579	7.16094	-3.95773	7.16443	-3.8487	7.18456	-3.84807		-1.69	-0.148828	-0.983499	-0.205746	-1.1422	-0.170963	-1.22273
2.40454	-0.36608	2.27421	-1.06889	7.17106	-4.00051	7.18624	-4.00059	7.19287	-3.89049	7.21101	-3.89019		-1.676	-0.146046	-0.98819	-0.202356	-1.14726	-0.167981	-1.22891
2.41864	-0.3704	2.289	-1.06595	7.19851	-4.0428	7.21164	-4.04302	7.22107	-3.93224	7.23726	-3.9322		-1.662	-0.143292	-0.992902	-0.198995	-1.15234	-0.165026	-1.2351
2.43285	-0.37472	2.30391	-1.06307	7.22583	-4.08498	7.23697	-4.08526	7.24917	-3.9739	7.26347	-3.97399		-1.648	-0.140567	-0.997633	-0.195662	-1.15743	-0.162097	-1.2413
2.44695	-0.37905	2.31873	-1.06023	7.25319	-4.12656	7.26241	-4.12684	7.27718	-4.01547	7.28965	-4.01563		-1.634	-0.13787	-1.00238	-0.192359	-1.16254	-0.159194	-1.2475
2.46105	-0.38348	2.33357	-1.05754	7.28074	-4.16787	7.28818	-4.16794	7.30515	-4.05665	7.31586	-4.05678		-1.62	-0.1352	-1.00715	-0.189084	-1.16767	-0.156318	-1.25371
2.47514	-0.38781	2.34843	-1.05479	7.30848	-4.20859	7.314	-4.20862	7.33318	-4.09767	7.34215	-4.09778		-1.606	-0.132559	-1.01193	-0.185839	-1.1728	-0.153469	-1.25992
2.48924	-0.39224	2.36331	-1.0522	7.33692	-4.24864	7.34069	-4.24816	7.3612	-4.13825	7.36855	-4.13813		-1.592	-0.129945	-1.01673	-0.182622	-1.17795	-0.150646	-1.26614
2.50334	-0.39668	2.3782	-1.04965	7.36613	-4.28864	7.36631	-4.28868	7.38965	-4.17865	7.39519	-4.17855		-1.578	-0.127359	-1.02153	-0.179433	-1.18311	-0.14785	-1.27235
2.51743	-0.40122	2.39311	-1.04725										-1.564	-0.124801	-1.02635	-0.176273	-1.18828	-0.14508	-1.27857
2.53142	-0.40566	2.40794	-1.0448										-1.55	-0.122271	-1.03118	-0.173142	-1.19345	-0.142337	-1.28478
2.54551	-0.4102	2.42288	-1.04251										-1.536	-0.119769	-1.03602	-0.17004	-1.19863	-0.13962	-1.29099
2.5596	-0.41475	2.43783	-1.04026										-1.522	-0.117294	-1.04087	-0.166966	-1.20381	-0.136929	-1.29719
2.57359	-0.4193	2.4527	-1.03806										-1.508	-0.114847	-1.04572	-0.16392	-1.209	-0.134266	-1.30339
2.58767	-0.42385	2.46769	-1.03591										-1.494	-0.112427	-1.05058	-0.160902	-1.21419	-0.131628	-1.30958
2.60165	-0.42851	2.48258	-1.03391										-1.48	-0.110034	-1.05544	-0.157914	-1.21939	-0.129017	-1.31577
2.61574	-0.43316	2.4976	-1.03196										-1.466	-0.107669	-1.06031	-0.154953	-1.22458	-0.126433	-1.32194
2.62972	-0.43782	2.51252	-1.03005										-1.452	-0.105331	-1.06518	-0.15202	-1.22977	-0.123875	-1.32811
2.6438	-0.44249	2.52756	-1.0282										-1.438	-0.103021	-1.07004	-0.149116	-1.23496	-0.121343	-1.33426
2.65777	-0.44715	2.54251	-1.02639										-1.424	-0.100737	-1.07491	-0.14624	-1.24014	-0.118838	-1.3404
2.67175	-0.45192	2.55747	-1.02474										-1.41	-0.098481	-1.07977	-0.143392	-1.24532	-0.11636	-1.34652
2.68572	-0.45669	2.57244	-1.02313										-1.396	-0.096252	-1.08463	-0.140572	-1.2505	-0.113907	-1.35263
2.69969	-0.46147	2.58743	-1.02158										-1.382	-0.094049	-1.08949	-0.137781	-1.25566	-0.111482	-1.35872
2.71366	-0.46624	2.60242	-1.02008										-1.368	-0.091874	-1.09433	-0.135017	-1.26082	-0.109082	-1.36479
2.72763	-0.47112	2.61743	-1.01872										-1.354	-0.089725	-1.09917	-0.132281	-1.26597	-0.10671	-1.37085
2.7416	-0.4759	2.63244	-1.01731										-1.34	-0.087603	-1.104	-0.129574	-1.2711	-0.104363	-1.37688
2.75556	-0.48079	2.64747	-1.01605										-1.326	-0.085508	-1.10883	-0.126894	-1.27623	-0.102043	-1.38289
2.76953	-0.48568	2.66251	-1.01485										-1.312	-0.083439	-1.11364	-0.124242	-1.28134	-0.09975	-1.38888
2.78349	-0.49067	2.67755	-1.01379										-1.298	-0.081398	-1.11843	-0.121618	-1.28644	-0.097482	-1.39484
2.79735	-0.49556	2.6925	-1.01268										-1.284	-0.079382	-1.12322	-0.119022	-1.29152	-0.095242	-1.40078
2.81131	-0.50056	2.70757	-1.01172										-1.27	-0.077393	-1.12798	-0.116453	-1.29658	-0.093027	-1.40669
2.82517	-0.50556	2.72254	-1.0108										-1.256	-0.07543	-1.13274	-0.113913	-1.30163	-0.090839	-1.41258
2.83912	-0.51056	2.73762	-1.00994										-1.242	-0.073494	-1.13747	-0.1114	-1.30665	-0.088677	-1.41843
2.85297	-0.51556	2.7526	-1.00912										-1.228	-0.071584	-1.14218	-0.108915	-1.31166	-0.086542	-1.42426
2.86682	-0.52067	2.76759	-1.00846										-1.214	-0.0697	-1.14688	-0.106458	-1.31664	-0.084433	-1.43005
2.88077	-0.52578	2.78269	-1.00784										-1.2	-0.067842	-1.15155	-0.104028	-1.3216	-0.082351	-1.43582
2.89462	-0.53089	2.7977	-1.00728										-1.186	-0.06601	-1.1562	-0.101626	-1.32654	-0.080294	-1.44155
2.90847	-0.53601	2.81271	-1.00676										-1.172	-0.064204	-1.16083	-0.099252	-1.33145	-0.078264	-1.44724
2.92231	-0.54113	2.82773	-1.00629										-1.158	-0.062424	-1.16543	-0.096906	-1.33633	-0.076261	-1.4529
2.93615	-0.54635	2.84276	-1.00596										-1.144	-0.06067	-1.17001	-0.094587	-1.34119	-0.074283	-1.45852
2.94999	-0.55157	2.85779	-1.00568										-1.13	-0.058942	-1.17456	-0.092296	-1.34602	-0.072332	-1.46411
2.96383	-0.5568	2.87282	-1.00546										-1.116	-0.057239	-1.17908	-0.090033	-1.35082	-0.070407	-1.46965
2.97757	-0.56203	2.88776	-1.00528										-1.102	-0.055563	-1.18357	-0.087797	-1.35559	-0.068509	-1.47516
2.9914	-0.56726	2.9028	-1.00515										-1.088	-0.053911	-1.18803	-0.085589	-1.36032	-0.066637	-1.48062
3.00524	-0.5726	2.91785	-1.00517										-1.074	-0.052286	-1.19246	-0.083409	-1.36503	-0.064791	-1.48605
3.01897	-0.57794	2.9328	-1.00523										-1.06	-0.050686	-1.19686	-0.081256	-1.3697	-0.062971	-1.49143
3.0328	-0.58328	2.94786	-1.00534										-1.046	-0.049111	-1.20122	-0.079131	-1.37433	-0.061177	-1.49677
3.04652	-0.58862	2.96282	-1.0055										-1.032	-0.047562	-1.20554	-0.077033	-1.37893	-0.05941	-1.50206
3.06035	-0.59397	2.97788	-1.0057										-1.018	-0.046038	-1.20983	-0.074963	-1.3835	-0.057669	-1.5073
3.07407	-0.59942	2.99285	-1.00606										-1.004	-0.04454	-1.21409	-0.072921	-1.38802	-0.055954	-1.5125
3.08779	-0.60487	3.00781	-1.00646										-0.99	-0.043067	-1.2183	-0.070907	-1.39251	-0.054265	-1.51765
3.10151	-0.61033	3.02278	-1.00691										-0.976	-0.041619	-1.22248	-0.06892	-1.39695	-0.052602	-1.52276
3.11523	-0.61579	3.03775	-1.0074										-0.962	-0.040196	-1.22661	-0.066961	-1.40136	-0.050966	-1.52781
3.12895	-0.62135	3.05273	-1.00804										-0.948	-0.038798	-1.2307	-0.065029	-1.40572	-0.049356	-1.53281
3.14266	-0.62692	3.0677	-1.00872										-0.934	-0.037426	-1.23476	-0.063125	-1.41004	-0.047771	-1.53776
3.15637	-0.63249	3.08268	-1.00946										-0.92	-0.036078	-1.23876	-0.061249	-1.41432	-0.046213	-1.54266
3.17008	-0.63806	3.09765	-1.01024										-0.906	-0.034756	-1.24273	-0.059401	-1.41855	-0.044681	-1.54751
3.18369	-0.64363	3.11253	-1.01106										-0.892	-0.033458	-1.24665	-0.05758	-1.42274	-0.043175	-1.5523
3.19739	-0.64921	3.12751	-1.01193										-0.878	-0.032186	-1.25052	-0.055787	-1.42688	-0.041695	-1.55703
3.2111	-0.65489	3.14249	-1.01295										-0.864	-0.030938	-1.25435	-0.054022	-1.43097	-0.040242	-1.56172
3.2247	-0.66057	3.15736	-1.01401										-0.85	-0.029715	-1.25812	-0.052285	-1.43501	-0.038814	-1.56634
3.2384	-0.66626	3.17234	-1.01511										-0.836	-0.028517	-1.26185	-0.050575	-1.43901	-0.037412	-1.5709
3.25199	-0.67205	3.18722	-1.01636										-0.822	-0.027344	-1.26553	-0.048893	-1.44295	-0.036036	-1.57541
3.26559	-0.67774	3.20209	-1.01756										-0.808	-0.026196	-1.26916	-0.04724	-1.44685	-0.034687	-1.57986
3.27918	-0.68354	3.21697	-1.0189										-0.794	-0.025072	-1.27273	-0.045613	-1.45069	-0.033363	-1.58425
3.29277	-0.68934	3.23184	-1.02028										-0.78	-0.023974	-1.27626	-0.044015	-1.45448	-0.032065	-1.58858
3.30636	-0.69514	3.24671	-1.02171										-0.766	-0.022899	-1.27973	-0.042445	-1.45822	-0.030793	-1.59285
3.31994	-0.70094	3.26158	-1.02318										-0.752	-0.02185	-1.28315	-0.040903	-1.4619	-0.029547	-1.59705
3.33353	-0.70685	3.27645	-1.0248										-0.738	-0.020825	-1.28651	-0.039388	-1.46553	-0.028327	-1.60119
3.34711	-0.71276	3.29131	-1.02646										-0.724	-0.019825	-1.28982	-0.037902	-1.4691	-0.027133	-1.60527
3.36069	-0.71868	3.30618	-1.02816										-0.71	-0.01885	-1.29307	-0.036443	-1.47262	-0.025965	-1.60929
3.37417	-0.72459	3.32094	-1.02991										-0.696	-0.017899	-1.29626	-0.035013	-1.47608	-0.024823	-1.61324
3.38774	-0.73051	3.33579	-1.03169										-0.682	-0.016972	-1.2994	-0.033611	-1.47948	-0.023707	-1.61712
3.40121	-0.73654	3.35055	-1.03362										-0.668	-0.016071	-1.30248	-0.032237	-1.48282	-0.022616	-1.62094
3.41479	-0.74256	3.3654	-1.0356										-0.654	-0.015194	-1.3055	-0.030891	-1.48611	-0.021551	-1.62469
3.42825	-0.74859	3.38015	-1.03761										-0.64	-0.014341	-1.30846	-0.029573	-1.48933	-0.020513	-1.62838
3.44172	-0.75463	3.39489	-1.03967										-0.626	-0.013513	-1.31136	-0.028283	-1.4925	-0.0195	-1.63199
3.45518	-0.76076	3.40963	-1.04187										-0.612	-0.01271	-1.3142	-0.027022	-1.4956	-0.018512	-1.63554
3.46864	-0.7668	3.42437	-1.04401										-0.598	-0.011931	-1.31698	-0.025788	-1.49865	-0.017551	-1.63902
3.4821	-0.77295	3.4391	-1.04629										-0.584	-0.011176	-1.31969	-0.024583	-1.50162	-0.016615	-1.64243
3.49556	-0.77909	3.45383	-1.04861										-0.57	-0.010447	-1.32235	-0.023407	-1.50454	-0.015705	-1.64577
3.50902	-0.78524	3.46855	-1.05097										-0.556	-0.009741	-1.32494	-0.022259	-1.5074	-0.014821	-1.64904
3.52247	-0.79149	3.48327	-1.05348										-0.542	-0.009061	-1.32746	-0.021139	-1.51018	-0.013963	-1.65223
3.53592	-0.79765	3.49798	-1.05592										-0.528	-0.008404	-1.32993	-0.020048	-1.51291	-0.01313	-1.65536
3.54926	-0.80391	3.51259	-1.0585										-0.514	-0.007773	-1.33232	-0.018985	-1.51557	-0.012323	-1.65841
3.56271	-0.81017	3.5273	-1.06113										-0.5	-0.007166	-1.33466	-0.01795	-1.51816	-0.011542	-1.66139
3.57605	-0.81643	3.54189	-1.06379										-0.486	-0.006583	-1.33693	-0.016944	-1.52069	-0.010786	-1.6643
3.58939	-0.8228	3.55648	-1.0666										-0.472	-0.006025	-1.33913	-0.015967	-1.52315	-0.010057	-1.66713
3.60283	-0.82917	3.57117	-1.06944										-0.458	-0.005492	-1.34126	-0.015019	-1.52555	-0.009352	-1.66989
3.61616	-0.83545	3.58575	-1.07222										-0.444	-0.004983	-1.34333	-0.014099	-1.52788	-0.008674	-1.67258
3.6295	-0.84183	3.60032	-1.07514										-0.43	-0.004499	-1.34534	-0.013207	-1.53014	-0.008021	-1.67519
3.64283	-0.84831	3.61489	-1.0782										-0.416	-0.004039	-1.34727	-0.012345	-1.53233	-0.007394	-1.67772
3.65615	-0.85469	3.62945	-1.0812										-0.402	-0.003605	-1.34914	-0.011511	-1.53445	-0.006792	-1.68018
3.66948	-0.86118	3.64401	-1.08433										-0.388	-0.003194	-1.35094	-0.010706	-1.5365	-0.006216	-1.68257
3.6828	-0.86767	3.65856	-1.0875										-0.374	-0.002809	-1.35267	-0.00993	-1.53849	-0.005665	-1.68488
3.69602	-0.87417	3.673	-1.09071										-0.36	-0.002448	-1.35433	-0.009183	-1.5404	-0.00514	-1.68711
3.70934	-0.88067	3.68753	-1.09396										-0.346	-0.002112	-1.35593	-0.008465	-1.54225	-0.004641	-1.68926
3.72255	-0.88727	3.70196	-1.09735										-0.332	-0.0018	-1.35745	-0.007775	-1.54402	-0.004167	-1.69134
3.73586	-0.89377	3.71648	-1.10067										-0.318	-0.001513	-1.35891	-0.007115	-1.54572	-0.003719	-1.69334
3.74907	-0.90038	3.73089	-1.10413										-0.304	-0.001251	-1.36029	-0.006484	-1.54735	-0.003296	-1.69527
3.76228	-0.90699	3.7453	-1.10762										-0.29	-0.001014	-1.36161	-0.005882	-1.54891	-0.002899	-1.69711
3.77548	-0.91361	3.7597	-1.11115										-0.276	-0.000802	-1.36286	-0.005309	-1.5504	-0.002527	-1.69888
3.78869	-0.92033	3.77408	-1.11482										-0.262	-0.000615	-1.36403	-0.004765	-1.55182	-0.002181	-1.70057
3.80188	-0.92695	3.78847	-1.11842										-0.248	-0.000452	-1.36514	-0.00425	-1.55316	-0.001861	-1.70218
3.81508	-0.93367	3.80284	-1.12216										-0.234	-0.000314	-1.36618	-0.003765	-1.55444	-0.001566	-1.70371
3.82827	-0.9404	3.81721	-1.12593										-0.22	-0.000201	-1.36714	-0.003309	-1.55564	-0.001296	-1.70516
3.84137	-0.94724	3.83146	-1.12984										-0.206	-0.000114	-1.36804	-0.002882	-1.55676	-0.001052	-1.70653
3.85455	-0.95397	3.84581	-1.13368										-0.192	-5.1e-05	-1.36886	-0.002484	-1.55782	-0.000833	-1.70783
3.86774	-0.96081	3.86016	-1.13766										-0.178	-1.3e-05	-1.36962	-0.002116	-1.5588	-0.00064	-1.70904
3.88082	-0.96765	3.87439	-1.14167										-0.164	0	-1.3703	-0.001777	-1.5597	-0.000472	-1.71018
3.8939	-0.9745	3.88861	-1.14572										-0.15	-1.2e-05	-1.37092	-0.001468	-1.56054	-0.00033	-1.71124
3.90708	-0.98135	3.90293	-1.1498										-0.136	-5e-05	-1.37146	-0.001188	-1.5613	-0.000213	-1.71221
3.92015	-0.9882	3.91714	-1.15391										-0.122	-0.000112	-1.37193	-0.000938	-1.56199	-0.000122	-1.71311
3.93322	-0.99516	3.93133	-1.15815										-0.108	-0.0002	-1.37234	-0.000717	-1.5626	-5.6e-05	-1.71393
3.94629	-1.00212	3.94552	-1.16243										-0.094	-0.000313	-1.37267	-0.000526	-1.56314	-1.5e-05	-1.71466
3.95936	-1.00908	3.9597	-1.16675										-0.08	-0.000451	-1.37293	-0.000364	-1.5636	0	-1.71532
3.97242	-1.01605	3.97387	-1.17109										-0.066	-0.000614	-1.37312	-0.000232	-1.564	-1e-05	-1.7159
3.98538	-1.02312	3.98793	-1.17557										-0.052	-0.000803	-1.37325	-0.000129	-1.56431	-4.6e-05	-1.7164
3.99844	-1.0301	4.00209	-1.17998										-0.038	-0.001017	-1.3733	-5.7e-05	-1.56456	-0.000107	-1.71681
4.01139	-1.03717	4.01613	-1.18452										-0.024	-0.001256	-1.37328	-1.4e-05	-1.56473	-0.000193	-1.71715
4.02444	-1.04426	4.03026	-1.18909										-0.01	-0.001521	-1.37319	0	-1.56482	-0.000305	-1.71741
4.03739	-1.05144	4.04429	-1.1938
4.05033	-1.05853	4.0583	-1.19843
4.06337	-1.06572	4.0724	-1.2032
4.07631	-1.07292	4.0864	-1.208
4.08925	-1.08012	4.10038	-1.21283
4.10208	-1.08732	4.11426	-1.21769
4.11501	-1.09453	4.12822	-1.22258
4.12794	-1.10184	4.14218	-1.2276
4.14076	-1.10916	4.15602	-1.23264
4.15368	-1.11647	4.16996	-1.23772
4.1665	-1.1238	4.18378	-1.24283
4.17941	-1.13112	4.19769	-1.24797
4.19222	-1.13855	4.21149	-1.25324
4.20503	-1.14598	4.22529	-1.25853
4.21783	-1.15342	4.23907	-1.26386
4.23063	-1.16086	4.25284	-1.26921
4.24333	-1.16831	4.2665	-1.27459
4.25613	-1.17585	4.28025	-1.2801
4.26892	-1.18341	4.29399	-1.28563
4.2816	-1.19096	4.30762	-1.2912
4.29429	-1.19852	4.32124	-1.29679
4.30707	-1.20608	4.33494	-1.30241
4.31975	-1.21375	4.34854	-1.30815
4.33242	-1.22142	4.36213	-1.31392
4.34509	-1.2291	4.3757	-1.31972
4.35776	-1.23678	4.38926	-1.32555
4.37042	-1.24446	4.40281	-1.3314
4.38298	-1.25225	4.41626	-1.33738
4.39564	-1.25994	4.42979	-1.34328
4.40819	-1.26773	4.4432	-1.34931
4.42084	-1.27553	4.45671	-1.35536
4.43338	-1.28344	4.47011	-1.36154
4.44593	-1.29124	4.48349	-1.36765
4.45847	-1.29916	4.49687	-1.37388
4.471	-1.30707	4.51023	-1.38013
4.48353	-1.31499	4.52358	-1.38641
4.49606	-1.32291	4.53692	-1.39272
4.50858	-1.33094	4.55025	-1.39915
4.521	-1.33887	4.56346	-1.4055
4.53342	-1.3469	4.57667	-1.41197
4.54593	-1.35494	4.58996	-1.41847
4.55834	-1.36299	4.60314	-1.425
4.57074	-1.37113	4.61631	-1.43164
4.58314	-1.37918	4.62947	-1.43822
4.59554	-1.38734	4.64262	-1.44491
4.60793	-1.3955	4.65575	-1.45162
4.62022	-1.40366	4.66877	-1.45836
4.63261	-1.41193	4.68188	-1.46523
4.64489	-1.4201	4.69489	-1.47201
4.65726	-1.42838	4.70797	-1.47892
4.66954	-1.43666	4.72095	-1.48584
4.6818	-1.44494	4.73391	-1.4928
4.69407	-1.45323	4.74687	-1.49977
4.70633	-1.46163	4.75981	-1.50686
4.71859	-1.47003	4.77274	-1.51398
4.73074	-1.47843	4.78555	-1.52111
4.74299	-1.48683	4.79846	-1.52827
4.75513	-1.49524	4.81125	-1.53545
4.76737	-1.50366	4.82413	-1.54265
4.7795	-1.51218	4.8369	-1.54998
4.79163	-1.5207	4.84966	-1.55732
4.80376	-1.52923	4.8624	-1.56468
4.81588	-1.53776	4.87513	-1.57206
4.828	-1.5463	4.88786	-1.57947
4.84001	-1.55494	4.90046	-1.58699
4.85212	-1.56359	4.91316	-1.59454
4.86412	-1.57224	4.92574	-1.6021
4.87622	-1.58089	4.93842	-1.60968
4.88822	-1.58955	4.95098	-1.61729
4.90021	-1.59831	4.96352	-1.62501
4.9122	-1.60698	4.97606	-1.63265
4.92418	-1.61575	4.98858	-1.64041
4.93615	-1.62453	5.00109	-1.64819
4.94803	-1.63331	5.01349	-1.65599
4.95999	-1.6422	5.02598	-1.66391
4.97185	-1.65099	5.03835	-1.67175
4.98381	-1.65989	5.05082	-1.67971
4.99566	-1.66879	5.06317	-1.68768
5.00751	-1.67769	5.0755	-1.69567
5.01936	-1.6867	5.08783	-1.70379
5.03109	-1.69561	5.10004	-1.71182
5.04293	-1.70463	5.11234	-1.71996
5.05475	-1.71365	5.12463	-1.72813
5.06648	-1.72268	5.1368	-1.73631
5.0783	-1.73171	5.14907	-1.74451
5.09001	-1.74085	5.16122	-1.75283
5.10172	-1.74989	5.17335	-1.76107
5.11342	-1.75904	5.18548	-1.76943
5.12512	-1.76819	5.19759	-1.7778
5.13671	-1.77735	5.20959	-1.78619
5.1484	-1.78661	5.22168	-1.79469
5.16008	-1.79578	5.23376	-1.80312
5.17165	-1.80505	5.24572	-1.81166
5.18323	-1.81432	5.25767	-1.82021
5.19479	-1.8236	5.26961	-1.82879
5.20635	-1.83289	5.28153	-1.83738
5.21791	-1.84228	5.29344	-1.84609
5.22946	-1.85167	5.30534	-1.85481
5.241	-1.86097	5.31723	-1.86345
5.25244	-1.87038	5.329	-1.87221
5.26397	-1.87989	5.34086	-1.88108
5.2754	-1.8893	5.35261	-1.88987
5.28682	-1.89872	5.36435	-1.89868
5.29824	-1.90825	5.37607	-1.9076
5.30965	-1.91778	5.38778	-1.91654
5.32105	-1.92731	5.39948	-1.92549
5.33235	-1.93685	5.41106	-1.93446
5.34374	-1.9465	5.42273	-1.94355
5.35503	-1.95615	5.43429	-1.95265
5.36641	-1.9657	5.44594	-1.96166
5.37768	-1.97536	5.45747	-1.97079
5.38895	-1.98503	5.46899	-1.97994
5.40022	-1.9948	5.48049	-1.9892
5.41137	-2.00447	5.49188	-1.99838
5.42262	-2.01425	5.50336	-2.00767
5.43387	-2.02404	5.51483	-2.01698
5.44501	-2.03383	5.52618	-2.02631
5.45614	-2.04363	5.53752	-2.03564
5.46726	-2.05353	5.54885	-2.04509
5.47838	-2.06333	5.56017	-2.05446
5.4895	-2.07324	5.57147	-2.06394
5.5006	-2.08316	5.58275	-2.07344
5.5117	-2.09309	5.59403	-2.08295
5.5227	-2.10301	5.60519	-2.09248
5.53368	-2.11305	5.61633	-2.10212
5.54477	-2.12308	5.62757	-2.11177
5.55574	-2.13303	5.63869	-2.12134
5.56671	-2.14308	5.64979	-2.13103
5.57757	-2.15313	5.66079	-2.14072
5.58852	-2.16329	5.67187	-2.15053
5.59947	-2.17335	5.68293	-2.16026
5.61031	-2.18352	5.69388	-2.1701
5.62114	-2.1937	5.70482	-2.17995
5.63207	-2.20388	5.71585	-2.18982
5.64289	-2.21407	5.72676	-2.1997
5.6537	-2.22436	5.73766	-2.2097
5.66441	-2.23456	5.74844	-2.21961
5.67521	-2.24486	5.75931	-2.22963
5.686	-2.25517	5.77017	-2.23966
5.69668	-2.26548	5.78091	-2.24971
5.70736	-2.2758	5.79164	-2.25977
5.71803	-2.28612	5.80235	-2.26985
5.72869	-2.29655	5.81305	-2.28004
5.73935	-2.30699	5.82374	-2.29024
5.74999	-2.31743	5.83441	-2.30046
5.76053	-2.32788	5.84497	-2.31069
5.77117	-2.33833	5.85561	-2.32093
5.78169	-2.34889	5.86614	-2.33129
5.79221	-2.35935	5.87666	-2.34155
5.80272	-2.36992	5.88716	-2.35193
5.81322	-2.38049	5.89765	-2.36233
5.82372	-2.39107	5.90812	-2.37273
5.8341	-2.40176	5.91848	-2.38325
5.84458	-2.41235	5.92892	-2.39368
5.85495	-2.42305	5.93925	-2.40423
5.86532	-2.43365	5.94957	-2.41468
5.87567	-2.44435	5.95987	-2.42525
5.88602	-2.45507	5.97015	-2.43583
5.89636	-2.46589	5.98043	-2.44653
5.90659	-2.47661	5.99058	-2.45713
5.91691	-2.48744	6.00082	-2.46785
5.92713	-2.49828	6.01095	-2.47859
5.93743	-2.50912	6.02116	-2.48933
5.94763	-2.51997	6.03126	-2.50009
5.95782	-2.53092	6.04134	-2.51095
5.9679	-2.54178	6.05131	-2.52173
5.97807	-2.55275	6.06137	-2.53262
5.98814	-2.56362	6.0713	-2.54343
5.99829	-2.57459	6.08133	-2.55434
6.00834	-2.58567	6.09124	-2.56537
6.01838	-2.59666	6.10113	-2.5763
6.02841	-2.60765	6.11101	-2.58725
6.03843	-2.61875	6.12087	-2.59831
6.04834	-2.62985	6.13062	-2.60939
6.05835	-2.64096	6.14045	-2.62047
6.06824	-2.65208	6.15017	-2.63157
6.07813	-2.6632	6.15987	-2.64267
6.088	-2.67442	6.16955	-2.65389
6.09787	-2.68556	6.17922	-2.66502
6.10773	-2.69679	6.18888	-2.67627
6.11757	-2.70804	6.19852	-2.68752
6.12731	-2.71929	6.20804	-2.69878
6.13714	-2.73064	6.21765	-2.71016
6.14686	-2.7419	6.22714	-2.72145
6.15658	-2.75327	6.23661	-2.73284
6.16628	-2.76464	6.24607	-2.74425
6.17597	-2.77602	6.25552	-2.75567
6.18555	-2.7874	6.26485	-2.7671
6.19523	-2.79879	6.27426	-2.77853
6.20479	-2.81028	6.28356	-2.79008
6.21435	-2.82168	6.29284	-2.80154
6.22389	-2.83318	6.3021	-2.81311
6.23343	-2.84469	6.31135	-2.82469
6.24285	-2.8562	6.32049	-2.83628
6.25237	-2.86772	6.3297	-2.84788
6.26177	-2.87925	6.3388	-2.85949
6.27127	-2.89088	6.34799	-2.87121
6.28066	-2.90251	6.35706	-2.88294
6.29003	-2.91405	6.36611	-2.89458
6.2993	-2.9257	6.37504	-2.90633
6.30865	-2.93745	6.38406	-2.91819
6.3179	-2.94911	6.39296	-2.92996
6.32723	-2.96077	6.40195	-2.94174
6.33646	-2.97253	6.41082	-2.95362
6.34567	-2.98431	6.41967	-2.96552
6.35488	-2.99608	6.42851	-2.97743
6.36407	-3.00786	6.43733	-2.98934
6.37316	-3.01965	6.44603	-3.00127
6.38233	-3.03154	6.45482	-3.0133
6.39139	-3.04334	6.46349	-3.02524
6.40045	-3.05524	6.47214	-3.03729
6.40949	-3.06714	6.48077	-3.04935
6.41852	-3.07905	6.48939	-3.06142
6.42744	-3.09097	6.4979	-3.07349
6.43645	-3.10298	6.50648	-3.08568
6.44535	-3.11491	6.51495	-3.09777
6.45424	-3.12693	6.5234	-3.10997
6.46312	-3.13897	6.53183	-3.12218
6.47199	-3.151	6.54025	-3.13439
6.48085	-3.16304	6.54865	-3.14661
6.48969	-3.17508	6.55703	-3.15884
6.49843	-3.18723	6.5653	-3.17118
6.50715	-3.19928	6.57355	-3.18342
6.51587	-3.21144	6.58178	-3.19577
6.52457	-3.2236	6.59	-3.20813
6.53327	-3.23576	6.5982	-3.22049
6.54195	-3.24792	6.60638	-3.23286
6.55052	-3.26009	6.61445	-3.24524
6.55918	-3.27236	6.62259	-3.25772
6.56773	-3.28464	6.63063	-3.27021
6.57627	-3.29692	6.63864	-3.2827
6.5848	-3.3092	6.64664	-3.2952
6.59322	-3.32148	6.65452	-3.3077
6.60173	-3.33377	6.66248	-3.32021
6.61013	-3.34605	6.67033	-3.33273
6.61861	-3.35844	6.67826	-3.34534
6.62699	-3.37083	6.68608	-3.35796
6.63526	-3.38323	6.69378	-3.37059
6.64361	-3.39562	6.70156	-3.38322
6.65196	-3.40802	6.70933	-3.39585
6.66019	-3.42042	6.71698	-3.40848
6.66842	-3.43292	6.72461	-3.42122
6.67673	-3.44532	6.73233	-3.43386
6.68494	-3.45782	6.73994	-3.4466
6.69303	-3.47032	6.74742	-3.45935
6.70121	-3.48282	6.755	-3.47209
6.70929	-3.49532	6.76245	-3.48484
6.71745	-3.50792	6.76999	-3.49768
6.72551	-3.52042	6.77742	-3.51043
6.73355	-3.53302	6.78483	-3.52328
6.74159	-3.54563	6.79223	-3.53613
6.74961	-3.55822	6.79961	-3.54898
6.75753	-3.57082	6.80688	-3.56183
6.76553	-3.58352	6.81423	-3.57477
6.77344	-3.59611	6.82147	-3.58762
6.78133	-3.6088	6.8287	-3.60056
6.78921	-3.62139	6.83591	-3.61339
6.79698	-3.63407	6.84301	-3.62633
6.80484	-3.64675	6.8502	-3.63926
6.8126	-3.65943	6.85728	-3.65218
6.82035	-3.6722	6.86435	-3.6652
6.8282	-3.68487	6.8715	-3.67811
6.83583	-3.69763	6.87845	-3.69112
6.84356	-3.71028	6.88548	-3.70402
6.85128	-3.72303	6.8925	-3.71701
6.8589	-3.73577	6.89942	-3.73
6.86651	-3.74851	6.90632	-3.74298
6.87411	-3.76134	6.91322	-3.75604
6.88171	-3.77406	6.9201	-3.769
6.8893	-3.78687	6.92698	-3.78205
6.89678	-3.79957	6.93375	-3.79498
6.90437	-3.81237	6.94061	-3.80801
6.91184	-3.82515	6.94737	-3.82102
6.91932	-3.83793	6.95412	-3.83402
6.92679	-3.85079	6.96086	-3.84711
6.93425	-3.86354	6.9676	-3.86008
6.94162	-3.87638	6.97424	-3.87313
6.94908	-3.88921	6.98097	-3.88617
6.95644	-3.90192	6.9876	-3.89909
6.9638	-3.91471	6.99423	-3.91209
6.97116	-3.92759	7.00086	-3.92517
6.97841	-3.94036	7.00739	-3.93813
6.98577	-3.9531	7.01402	-3.95107
6.99303	-3.96593	7.02055	-3.96408
7.00029	-3.97864	7.02708	-3.97697
7.00756	-3.99143	7.03361	-3.98994
7.01482	-4.0042	7.04015	-4.00288
7.02209	-4.01695	7.0467	-4.01579
7.02926	-4.02968	7.05314	-4.02868
7.03654	-4.04248	7.0597	-4.04163
7.04372	-4.05516	7.06616	-4.05446
7.0509	-4.06792	7.07263	-4.06735
7.05809	-4.08064	7.07911	-4.08021
7.06519	-4.09334	7.0855	-4.09303
7.0724	-4.10601	7.092	-4.10581
7.07952	-4.11864	7.09842	-4.11855
7.08664	-4.13125	7.10485	-4.13126
7.09378	-4.14391	7.11129	-4.14401
7.10092	-4.15645	7.11775	-4.15663
7.10798	-4.16904	7.12412	-4.16929
7.11515	-4.18159	7.13062	-4.18191
7.12223	-4.1941	7.13703	-4.19447
7.12933	-4.20657	7.14347	-4.20698
7.13644	-4.21898	7.14993	-4.21943
7.14357	-4.23144	7.15641	-4.23191
7.15072	-4.24375	7.16293	-4.24423
7.1578	-4.25609	7.16938	-4.25658
7.16489	-4.26838	7.17585	-4.26886
7.17202	-4.28059	7.18236	-4.28105
7.17917	-4.29273	7.18892	-4.29317
7.18637	-4.30479	7.19552	-4.30519
7.1935	-4.31676	7.20207	-4.31712
7.20077	-4.32866	7.20877	-4.32897
7.20799	-4.34055	7.21542	-4.34079
7.21528	-4.35234	7.22216	-4.35252
7.22265	-4.36401	7.22897	-4.36412
7.22999	-4.37561	7.23576	-4.37563
7.23752	-4.38707	7.24275	-4.387
7.24506	-4.39842	7.24973	-4.3983
7.25273	-4.40959	7.25683	-4.40943
7.26056	-4.42092	7.26407	-4.42069
7.26849	-4.43198	7.27125	-4.43183
7.2765	-4.44311	7.27848	-4.44282
7.28466	-4.45437	7.28489	-4.45441

## Sheet: Q prof
Spatial profiles																						Temporal profiles
q1	sim			q2	sim			q3	sim				meas	q3		q2		q1				sim	q3	q2	q1		meas	q3	q2	q1
x0	y0	x1	y1	x0	y0	x1	y1	x0	y0	x1	y1		x	y0	y1	y0	y1	y0	y1			time [ms]	Apex Displacement [mm]				time [ms]	Apex Displacement [mm]
-4.8932e-07	0	7.6426e-06	-1.043	-3.9777e-06	0	1.5992e-05	-0.91282	-2.4697e-06	0	1.4678e-05	-0.70438		-4									0	0	0	0		0	0	0	0
0.0143069	0	0.0134468	-1.04297	0.0514847	-0.00021	0.0480377	-0.91265	0.0511094	-0.0001	0.0478889	-0.7042		-3.986									0.2	6.4e-05	6.5e-05	4e-05		0.231	0.008584	0.016459	0.020632
0.0286139	-0.0001	0.0268893	-1.04296	0.102967	-0.00065	0.0960684	-0.91189	0.102214	-0.00063	0.0957776	-0.70381		-3.972									0.5	8.4e-05	8e-05	0.00012		0.462	0.008588	0.016688	0.020907
0.0428932	-0.00011	0.040311	-1.04279	0.154449	-0.00141	0.144113	-0.91066	0.153321	-0.00137	0.143683	-0.70305		-3.958									0.7	6e-05	4.9e-05	8e-05		0.693	0.007014	0.016125	0.021244
0.0571715	-0.00022	0.0537308	-1.04265	0.205931	-0.0025	0.19216	-0.90896	0.204427	-0.00232	0.191604	-0.70189		-3.944									0.9	1.7e-05	5e-06	-1e-05		0.924	0.006111	0.015162	0.020663
0.0714559	-0.00032	0.0671559	-1.04244	0.257401	-0.00382	0.24022	-0.9067	0.255522	-0.00369	0.239535	-0.70056		-3.93									1.2	-2.7e-05	-3.5e-05	-7e-05		1.155	0.00504	0.014148	0.019196
0.0857403	-0.00043	0.0805784	-1.04216	0.308859	-0.00556	0.288281	-0.90408	0.306616	-0.00528	0.287495	-0.69885		-3.916									1.4	-7e-05	-6.9e-05	-8e-05		1.386	0.00478	0.013041	0.01692
0.100032	-0.00065	0.0940104	-1.0419	0.360316	-0.00752	0.336356	-0.90091	0.357689	-0.00718	0.335469	-0.69688		-3.902									1.6	-9.4e-05	-8.3e-05	0		1.617	0.00386	0.011722	0.015041
0.114326	-0.00076	0.107443	-1.04148	0.411751	-0.00981	0.384443	-0.8973	0.408761	-0.0094	0.383484	-0.69464		-3.888									1.8	-5.7e-05	-3.6e-05	0.00012		1.848	0.002823	0.010268	0.012833
0.128626	-0.00098	0.120884	-1.04109	0.463172	-0.01243	0.432545	-0.89327	0.459811	-0.01194	0.431521	-0.69215		-3.874									2.1	4.2e-05	6.5e-05	0.00012		2.079	0.002011	0.008573	0.010096
0.142925	-0.0012	0.134322	-1.04064	0.514571	-0.01536	0.480665	-0.88881	0.51085	-0.01469	0.479599	-0.68932		-3.86									2.3	0.000124	0.000128	-3e-05		2.31	0.000268	0.006696	0.009319
0.157235	-0.00142	0.147768	-1.04011	0.565957	-0.01853	0.528803	-0.88385	0.561866	-0.01775	0.527721	-0.68625		-3.846									2.5	-0.001269	-0.001632	-0.00309		2.541	-0.001426	0.004892	0.005752
0.171545	-0.00174	0.161217	-1.03961	0.617329	-0.02202	0.576984	-0.8785	0.612871	-0.02113	0.575895	-0.68297		-3.832									2.8	-0.004548	-0.005654	-0.00847		2.772	-0.003656	0.003053	0.004039
0.185875	-0.00206	0.174682	-1.03904	0.668668	-0.02583	0.625185	-0.87279	0.663843	-0.02483	0.624107	-0.67948		-3.818									3	-0.007191	-0.008677	-0.01031		3.003	-0.006493	0.000805	0.001701
0.200194	-0.00239	0.188142	-1.03841	0.719982	-0.02996	0.673429	-0.86671	0.714802	-0.02874	0.672384	-0.67569		-3.804									3.2	-0.007865	-0.009082	-0.00838		3.234	-0.009661	-0.002539	-0.000518
0.214524	-0.00272	0.201604	-1.0377	0.771282	-0.03442	0.721714	-0.86029	0.765739	-0.03297	0.720735	-0.67172		-3.79									3.5	-0.007201	-0.00794	-0.00613		3.465	-0.011976	-0.005821	-0.003427
0.228864	-0.00305	0.21508	-1.03692	0.822547	-0.0391	0.770054	-0.85346	0.816643	-0.03751	0.769142	-0.66759		-3.776									3.7	-0.005791	-0.006183	-0.00496		3.696	-0.013736	-0.009429	-0.007946
0.243214	-0.00348	0.228566	-1.03618	0.873778	-0.04421	0.818444	-0.84645	0.867524	-0.04236	0.817626	-0.66332		-3.762	-0.746023	-0.767443			-0.787931	-0.777866			3.9	-0.004239	-0.004568	-0.00547		3.927	-0.015344	-0.012245	-0.010918
0.257564	-0.00392	0.242051	-1.03537	0.924983	-0.04953	0.86691	-0.83905	0.918372	-0.04753	0.86618	-0.65891		-3.748	-0.740354	-0.763123			-0.781546	-0.773533			4.2	-0.003173	-0.003741	-0.00726		4.158	-0.018288	-0.015463	-0.013763
0.271924	-0.00435	0.255544	-1.03448	0.976142	-0.05518	0.915418	-0.83141	0.969196	-0.05291	0.914839	-0.65429		-3.734	-0.734693	-0.758808	-0.822275	-0.810385	-0.775255	-0.769267			4.4	-0.003023	-0.004031	-0.00874		4.389	-0.021773	-0.018886	-0.016374
0.286274	-0.00479	0.269028	-1.03353	1.02725	-0.06105	0.963998	-0.82344	1.01999	-0.05861	0.963586	-0.64958		-3.72	-0.729044	-0.754503	-0.815525	-0.805699	-0.76905	-0.765067			4.6	-0.005317	-0.007094	-0.01142		4.62	-0.025752	-0.022312	-0.020096
0.300644	-0.00533	0.28253	-1.03261	1.07835	-0.06734	1.01271	-0.8154	1.07076	-0.06462	1.01242	-0.64481		-3.706	-0.723407	-0.750207	-0.808827	-0.801033	-0.762927	-0.760932			4.9	-0.010121	-0.01279	-0.01511		4.851	-0.028681	-0.025484	-0.024483
0.315014	-0.00577	0.296034	-1.03152	1.12946	-0.07385	1.06157	-0.80711	1.12142	-0.07085	1.06131	-0.6399		-3.692	-0.717784	-0.745925	-0.802178	-0.796391	-0.756881	-0.756861			5.1	-0.014138	-0.016948	-0.01567		5.082	-0.031891	-0.029883	-0.029423
0.329394	-0.00632	0.309547	-1.03046	1.18045	-0.08068	1.11043	-0.7987	1.17218	-0.07748	1.11043	-0.63509		-3.678	-0.712176	-0.7417	-0.795578	-0.791775	-0.750907	-0.752854			5.3	-0.015828	-0.017992	-0.0157		5.313	-0.03904	-0.03687	-0.037473
0.343764	-0.00696	0.323049	-1.02943	1.23144	-0.08783	1.15947	-0.79017	1.22273	-0.08433	1.1595	-0.63016		-3.664	-0.706585	-0.737511	-0.789023	-0.787188	-0.745001	-0.748908			5.5	-0.017175	-0.018989	-0.02094		5.544	-0.051355	-0.051667	-0.051313
0.358144	-0.00751	0.33656	-1.02824	1.28232	-0.0952	1.20857	-0.78151	1.27338	-0.09149	1.20881	-0.62526		-3.65	-0.701013	-0.733303	-0.782512	-0.782632	-0.739158	-0.745025			5.8	-0.022198	-0.025234	-0.035		5.775	-0.070481	-0.073479	-0.076061
0.372514	-0.00816	0.350063	-1.02707	1.3332	-0.10298	1.25785	-0.77293	1.32393	-0.09887	1.25818	-0.62033		-3.636	-0.695458	-0.729086	-0.776045	-0.778108	-0.733375	-0.741202			6	-0.035491	-0.042269	-0.06109		6.006	-0.090722	-0.09867	-0.106573
0.386893	-0.00871	0.363574	-1.02574	1.38407	-0.11099	1.30729	-0.76428	1.37448	-0.10655	1.30772	-0.61549		-3.622	-0.689925	-0.724865	-0.769618	-0.77362	-0.727649	-0.737439			6.2	-0.058454	-0.07129	-0.09727		6.237	-0.110051	-0.125368	-0.139335
0.401262	-0.00947	0.377077	-1.02455	1.43483	-0.11931	1.35683	-0.75565	1.42491	-0.11455	1.35732	-0.61073		-3.608	-0.684412	-0.720646	-0.763233	-0.769169	-0.721974	-0.733737			6.5	-0.087626	-0.107231	-0.13475		6.468	-0.126366	-0.154991	-0.171587
0.415631	-0.01012	0.390578	-1.02318	1.48559	-0.12795	1.40657	-0.74713	1.47535	-0.12286	1.40709	-0.60612		-3.594	-0.678921	-0.716438	-0.756886	-0.764757	-0.716349	-0.730093			6.7	-0.11484	-0.139332	-0.159022		6.699	-0.13955	-0.183816	-0.209195
0.42999	-0.01078	0.404071	-1.02175	1.53634	-0.1368	1.45653	-0.73866	1.52568	-0.13148	1.45693	-0.60168		-3.58	-0.673454	-0.712244	-0.750576	-0.760385	-0.71077	-0.726507			6.9	-0.133691	-0.159738	-0.167055		6.93	-0.155033	-0.20813	-0.249625
0.444338	-0.01154	0.417554	-1.02036	1.58688	-0.14596	1.50648	-0.73039	1.576	-0.14031	1.50695	-0.59736		-3.566	-0.668009	-0.708071	-0.744304	-0.756056	-0.705234	-0.722982			7.2	-0.143223	-0.168496	-0.171239		7.161	-0.168507	-0.231354	-0.286889
0.458686	-0.0123	0.431036	-1.0189	1.63751	-0.15545	1.55676	-0.72228	1.62632	-0.14945	1.55713	-0.5932		-3.552	-0.662589	-0.703925	-0.738067	-0.751771	-0.699739	-0.719514			7.4	-0.14692	-0.171669	-0.186767		7.392	-0.180996	-0.245555	-0.320533
0.473004	-0.01306	0.444489	-1.01738	1.68804	-0.16524	1.60714	-0.71447	1.67654	-0.1589	1.60739	-0.58933		-3.538	-0.657193	-0.699808	-0.731866	-0.747532	-0.69428	-0.716104			7.6	-0.149615	-0.176321	-0.216979		7.623	-0.191945	-0.256775	-0.340605
0.487321	-0.01393	0.457945	-1.01589	1.73846	-0.17535	1.65766	-0.70698	1.72665	-0.16856	1.65773	-0.58566		-3.524	-0.651823	-0.695725	-0.725697	-0.743339	-0.688858	-0.712753			7.9	-0.154386	-0.185803	-0.248794		7.854	-0.200226	-0.264206	-0.342989
0.501607	-0.01469	0.471372	-1.01424	1.78887	-0.18567	1.7084	-0.6998	1.77676	-0.17863	1.70823	-0.58244		-3.51	-0.646479	-0.691682	-0.719562	-0.739194	-0.683469	-0.709458			8.1	-0.165904	-0.20423	-0.274465		8.085	-0.210866	-0.267586	-0.342894
0.515883	-0.01556	0.484785	-1.01263	1.83918	-0.1963	1.75926	-0.69314	1.82687	-0.18891	1.75891	-0.5796		-3.496	-0.641162	-0.68768	-0.71346	-0.7351	-0.678111	-0.706222			8.3	-0.185993	-0.23206	-0.291316		8.316	-0.222537	-0.27914	-0.357098
0.530118	-0.01643	0.498167	-1.01097	1.88949	-0.20725	1.81033	-0.68695	1.87687	-0.19939	1.80964	-0.57706		-3.482	-0.635871	-0.683724	-0.70739	-0.731056	-0.672781	-0.703044			8.5	-0.21233	-0.265206	-0.304045		8.547	-0.239392	-0.296639	-0.384009
0.544342	-0.01731	0.511535	-1.00924	1.93968	-0.2184	1.86152	-0.6812	1.92677	-0.21028	1.86044	-0.57509		-3.468	-0.630607	-0.679817	-0.70135	-0.727063	-0.667479	-0.699923			8.8	-0.24245	-0.30074	-0.328496		8.778	-0.260864	-0.322515	-0.419441
0.558536	-0.01818	0.524876	-1.00745	1.98987	-0.22996	1.91289	-0.67608	1.97666	-0.22138	1.91138	-0.57347		-3.454	-0.62537	-0.67596	-0.69534	-0.723125	-0.662203	-0.696861			9	-0.268692	-0.330281	-0.364		9.009	-0.284563	-0.355954	-0.44494
0.572729	-0.01915	0.538218	-1.00571	2.03995	-0.24174	1.96434	-0.67139	2.02645	-0.23279	1.96234	-0.57229		-3.44	-0.620161	-0.672157	-0.689361	-0.71924	-0.65695	-0.693856			9.2	-0.283428	-0.345628	-0.39828		9.24	-0.306402	-0.388928	-0.471271
0.586902	-0.02013	0.551541	-1.0039	2.03995	-0.24174	1.96434	-0.67139	2.02645	-0.23279	1.96234	-0.57229		-3.426	-0.61498	-0.668411	-0.683412	-0.715411	-0.651721	-0.690909			9.5	-0.28902	-0.351399	-0.42769		9.471	-0.325551	-0.419499	-0.508698
0.601064	-0.02111	0.564857	-1.00204	2.08957	-0.25372	2.01549	-0.66726	2.07577	-0.2444	2.01286	-0.57138		-3.412	-0.609827	-0.664721	-0.677492	-0.711637	-0.646512	-0.68802			9.7	-0.291553	-0.356739	-0.44727		9.702	-0.340429	-0.455393	-0.548709
0.615216	-0.02209	0.57816	-1.00011	2.13903	-0.26601	2.06669	-0.66378	2.12494	-0.25622	2.0635	-0.5711		-3.398	-0.604702	-0.661092	-0.6716	-0.70792	-0.641324	-0.68519			9.9	-0.294864	-0.366327	-0.45433		9.933	-0.353354	-0.488761	-0.594178
0.629377	-0.02318	0.591478	-0.99822	2.18839	-0.27851	2.11792	-0.6608	2.17401	-0.26835	2.11416	-0.57131		-3.384	-0.599606	-0.657524	-0.665737	-0.704261	-0.636154	-0.682417			10.2	-0.303052	-0.383041	-0.46187		10.164	-0.356643	-0.511533	-0.634445
0.643529	-0.02416	0.604786	-0.99618	2.23774	-0.29121	2.16929	-0.65829	2.22308	-0.28068	2.16492	-0.57189		-3.37	-0.594537	-0.654019	-0.659902	-0.70066	-0.631004	-0.679704			10.4	-0.319946	-0.408657	-0.48631		10.395	-0.364001	-0.53292	-0.657813
0.65768	-0.02525	0.618093	-0.99417	2.28699	-0.30433	2.2207	-0.656496	2.27204	-0.29332	2.21569	-0.57298		-3.356	-0.589497	-0.650577	-0.654095	-0.697118	-0.62587	-0.67705			10.6	-0.344179	-0.439856	-0.52575		10.626	-0.388075	-0.555462	-0.66749
0.671831	-0.02634	0.631403	-0.99211	2.33613	-0.31766	2.27213	-0.655203	2.3209	-0.30617	2.26644	-0.574475		-3.342	-0.584485	-0.6472	-0.648315	-0.693636	-0.620752	-0.674454			10.9	-0.371236	-0.471879	-0.56739		10.857	-0.415615	-0.566857	-0.691359
0.685982	-0.02753	0.644717	-0.99008	2.38527	-0.3313	2.32366	-0.654545	2.36976	-0.31943	2.31729	-0.576585		-3.328	-0.579503	-0.643888	-0.642563	-0.690214	-0.615649	-0.671919			11.1	-0.396939	-0.501938	-0.60067		11.088	-0.436581	-0.570683	-0.709718
0.700173	-0.02862	0.658067	-0.98789	2.4343	-0.34515	2.37518	-0.654419	2.41851	-0.33289	2.36813	-0.579124		-3.314	-0.574549	-0.640645	-0.63684	-0.686852	-0.610563	-0.669443			11.3	-0.418191	-0.528043	-0.62236		11.319	-0.453613	-0.585143	-0.704883
0.714353	-0.02981	0.671411	-0.98574	2.48323	-0.35931	2.42671	-0.654931	2.46716	-0.34657	2.41893	-0.582097		-3.3	-0.569643	-0.637512	-0.631142	-0.683553	-0.605433	-0.667024			11.5	-0.435149	-0.550709	-0.64148		11.55	-0.474413	-0.606691	-0.711917
0.728595	-0.03101	0.684813	-0.98352	2.53204	-0.37379	2.47821	-0.656089	2.51581	-0.36055	2.4698	-0.585607		-3.286	-0.564763	-0.634443	-0.625471	-0.680314	-0.600039	-0.664651			11.8	-0.451376	-0.57391	-0.67136		11.781	-0.486355	-0.638589	-0.738865
0.742836	-0.03221	0.698222	-0.98124	2.58086	-0.38847	2.52977	-0.657796	2.56425	-0.37485	2.52054	-0.58966		-3.272	-0.559909	-0.631437	-0.619828	-0.677138	-0.594659	-0.662338			12	-0.468402	-0.599411	-0.71185		12.012	-0.507282	-0.662554	-0.769608
0.757129	-0.03351	0.711674	-0.97899	2.62957	-0.40347	2.5813	-0.660157	2.61269	-0.38935	2.57132	-0.594161		-3.258	-0.555079	-0.628495	-0.614208	-0.674034	-0.589276	-0.660069			12.2	-0.483284	-0.623671	-0.74964		12.243	-0.529115	-0.685876	-0.803881
0.77142	-0.03481	0.725132	-0.97668	2.67817	-0.41868	2.63278	-0.663073	2.66113	-0.40416	2.62216	-0.599214		-3.244	-0.550273	-0.625614	-0.60861	-0.670999	-0.583927	-0.657865			12.5	-0.497229	-0.647477	-0.78146		12.474	-0.541983	-0.71482	-0.813323
0.785733	-0.03611	0.738613	-0.97431	2.72666	-0.4343	2.6842	-0.666743	2.70936	-0.41928	2.67283	-0.604817		-3.23	-0.545492	-0.622795	-0.603032	-0.668014	-0.578607	-0.655726			12.7	-0.513779	-0.673152	-0.80505		12.705	-0.552676	-0.742937	-0.849168
0.800054	-0.03742	0.752105	-0.97188	2.77515	-0.45003	2.73566	-0.670868	2.75759	-0.43462	2.72354	-0.610876		-3.216	-0.540733	-0.620038	-0.597484	-0.665085	-0.57332	-0.653653			12.9	-0.531889	-0.697182	-0.81341		12.936	-0.573233	-0.766924	-0.891785
0.814376	-0.03873	0.765599	-0.96939	2.82344	-0.46618	2.78694	-0.675751	2.80571	-0.45016	2.77417	-0.617393		-3.202	-0.535998	-0.61734	-0.591965	-0.662217	-0.568065	-0.651647			13.2	-0.549522	-0.716993	-0.81556		13.167	-0.589979	-0.765945	-0.916096
0.828697	-0.04013	0.779096	-0.96695	2.87171	-0.48254	2.83824	-0.681188	2.85373	-0.46611	2.82472	-0.624568		-3.188	-0.531287	-0.614703	-0.586476	-0.659411	-0.562842	-0.649708			13.4	-0.564734	-0.732529	-0.82673		13.398	-0.59858	-0.770737	-0.926585
0.842998	-0.04155	0.79258	-0.96446	2.91988	-0.49921	2.88945	-0.687279	2.90164	-0.48228	2.87519	-0.632199		-3.174	-0.526598	-0.612132	-0.581017	-0.656666	-0.557651	-0.647836			13.6	-0.577128	-0.745845	-0.85385		13.629	-0.608055	-0.793301	-0.920871
0.857298	-0.04296	0.806066	-0.96191	2.96795	-0.5161	2.94056	-0.693919	2.94945	-0.49865	2.92557	-0.640289		-3.16	-0.521932	-0.609614	-0.57559	-0.653983	-0.552492	-0.646031			13.9	-0.586776	-0.75812	-0.88787		13.86	-0.604432	-0.804287	-0.923485
0.871557	-0.04437	0.819517	-0.95933	3.0159	-0.5333	2.99157	-0.70121	2.99726	-0.51534	2.97595	-0.648939		-3.146	-0.517289	-0.607143	-0.570192	-0.651362	-0.547365	-0.644294			14.1	-0.594595	-0.769981	-0.91468		14.091	-0.608893	-0.813751	-0.938328
0.885805	-0.04589	0.832961	-0.95678	3.06385	-0.55081	3.04256	-0.709146	3.04486	-0.53233	3.02613	-0.658147		-3.132	-0.512668	-0.60472	-0.564826	-0.648802	-0.542272	-0.642626			14.3	-0.60467	-0.785328	-0.93289		14.322	-0.610337	-0.822056	-0.930602
0.899972	-0.04731	0.846333	-0.95411	3.1116	-0.56854	3.09334	-0.717624	3.09245	-0.54954	3.0763	-0.66781		-3.118	-0.50807	-0.602344	-0.559489	-0.646305	-0.537211	-0.641026			14.6	-0.617406	-0.803933	-0.94322		14.553	-0.622982	-0.835237	-0.938382
0.914138	-0.04882	0.85971	-0.95149	3.15923	-0.58648	3.14399	-0.726639	3.13994	-0.56706	3.12636	-0.678028		-3.104	-0.503494	-0.600014	-0.554184	-0.643871	-0.532181	-0.639494			14.8	-0.630275	-0.822644	-0.94901		14.784	-0.623492	-0.853217	-0.931926
0.928304	-0.05035	0.873091	-0.94882	3.20686	-0.60484	3.19461	-0.73639	3.18732	-0.5848	3.17631	-0.688701		-3.09	-0.498939	-0.59773	-0.548909	-0.641498	-0.527184	-0.638031			15	-0.641723	-0.839693	-0.95387		15.015	-0.64941	-0.863267	-0.944184
0.942459	-0.05187	0.886466	-0.9461	3.25428	-0.62342	3.245	-0.74667	3.2345	-0.60284	3.22603	-0.699924		-3.076	-0.494407	-0.595491	-0.543665	-0.639189	-0.52222	-0.636638			15.2	-0.653035	-0.856105	-0.96343		15.246	-0.667058	-0.864754	-0.967756
0.956696	-0.05349	0.899924	-0.9434	3.30169	-0.64221	3.29535	-0.75747	3.28167	-0.6212	3.27572	-0.711695		-3.062	-0.489896	-0.593297	-0.538452	-0.636942	-0.517289	-0.635314			15.5	-0.66613	-0.873036	-0.98386		15.477	-0.666201	-0.87927	-0.9693
0.970932	-0.05512	0.913388	-0.94066	3.34899	-0.66132	3.34555	-0.76888	3.32874	-0.63977	3.32529	-0.723912		-3.048	-0.485407	-0.591147	-0.533269	-0.634759	-0.512389	-0.634058			15.7	-0.677273	-0.885308	-1.00482		15.708	-0.676425	-0.892314	-0.997458
0.985208	-0.05675	0.926896	-0.93785	3.39608	-0.68074	3.39549	-0.78092	3.3758	-0.65856	3.37482	-0.736573		-3.034	-0.480939	-0.589039	-0.528117	-0.632638	-0.507522	-0.632872			15.9	-0.683918	-0.890826	-1.01709		15.939	-0.677007	-0.89489	-1.01239
0.999485	-0.05838	0.940408	-0.935	3.44317	-0.70038	3.44539	-0.79345	3.42265	-0.67765	3.42411	-0.749773		-3.02	-0.476494	-0.586975	-0.522995	-0.63058	-0.502687	-0.631756			16.2	-0.688502	-0.89441	-1.02391		16.17	-0.680271	-0.882893	-1.00053
1.01376	-0.06011	0.953929	-0.93219	3.49004	-0.72034	3.49502	-0.80659	3.4694	-0.69707	3.47326	-0.763509		-3.006	-0.472069	-0.584954	-0.517904	-0.628586	-0.497885	-0.630709			16.4	-0.69081	-0.896648	-1.02568		16.401	-0.679979	-0.885225	-1.01727
1.02802	-0.06174	0.967434	-0.92925	3.5369	-0.74052	3.5446	-0.82022	3.51604	-0.71669	3.52226	-0.777677		-2.992	-0.467665	-0.582974	-0.512844	-0.626653	-0.493115	-0.62973			16.6	-0.689652	-0.895727	-1.02208		16.632	-0.675191	-0.89819	-1.02026
1.0423	-0.06348	0.980978	-0.92636	3.58356	-0.76101	3.5939	-0.83444	3.56258	-0.73663	3.57112	-0.792375		-2.978	-0.463283	-0.581037	-0.507815	-0.624785	-0.488377	-0.628822			16.9	-0.685554	-0.891682	-1.01302		16.863	-0.676032	-0.890996	-1.02231
1.05648	-0.06521	0.994428	-0.92343	3.63021	-0.78173	3.64314	-0.84915	3.609	-0.75679	3.61983	-0.8075		-2.964	-0.458921	-0.579141	-0.502816	-0.62298	-0.483671	-0.627982			17.1	-0.679377	-0.885245	-1.00115		17.094	-0.667678	-0.88142	-0.999071
1.07067	-0.06705	1.00789	-0.92058	3.67664	-0.80276	3.69211	-0.86442	3.65532	-0.77716	3.66838	-0.82304		-2.95	-0.45458	-0.577286	-0.497847	-0.621238	-0.478996	-0.627212			17.3	-0.670197	-0.875114	-0.98912		17.325	-0.659649	-0.876214	-1.00408
1.08485	-0.06879	1.02136	-0.91759	3.72296	-0.82411	3.7409	-0.88027	3.70143	-0.79785	3.71667	-0.8391		-2.936	-0.450261	-0.575472	-0.49291	-0.619559	-0.474355	-0.626511			17.6	-0.654472	-0.856603	-0.9705		17.556	-0.664528	-0.862979	-0.992858
1.09893	-0.07063	1.03473	-0.91466	3.76917	-0.84559	3.78952	-0.89648	3.74753	-0.81885	3.76491	-0.85568		-2.922	-0.445962	-0.573697	-0.488003	-0.617943	-0.469744	-0.625879			17.8	-0.629791	-0.82625	-0.93734		17.787	-0.65575	-0.840925	-0.976732
1.11311	-0.07247	1.04822	-0.9117	3.81527	-0.86748	3.83796	-0.91335	3.79353	-0.84007	3.81299	-0.87266		-2.908	-0.441685	-0.571964	-0.483125	-0.616391	-0.465164	-0.625315			18	-0.596964	-0.784274	-0.88987		18.018	-0.639735	-0.823956	-0.949156
1.12719	-0.07431	1.06161	-0.90871	3.86126	-0.8896	3.88621	-0.93066	3.83931	-0.86161	3.8608	-0.89014		-2.894	-0.437428	-0.570271	-0.478278	-0.614901	-0.460617	-0.624821			18.2	-0.559986	-0.734418	-0.83898		18.249	-0.614403	-0.811142	-0.917578
1.14127	-0.07616	1.07502	-0.90568	3.90714	-0.91193	3.93429	-0.94842	3.88509	-0.88336	3.90855	-0.90803		-2.88	-0.433191	-0.568616	-0.473461	-0.613475	-0.456101	-0.624394			18.5	-0.522882	-0.681204	-0.79305		18.48	-0.594314	-0.794101	-0.894531
1.15524	-0.078	1.08833	-0.90261	3.9528	-0.93459	3.98208	-0.96672	3.93066	-0.90533	3.95603	-0.92631		-2.866	-0.428977	-0.567002	-0.468674	-0.612111	-0.451616	-0.624036			18.7	-0.488836	-0.630139	-0.75363		18.711	-0.569529	-0.771399	-0.904897
1.16932	-0.07995	1.10175	-0.89961	3.99835	-0.95757	4.02968	-0.98555	3.97611	-0.92761	4.00334	-0.94509		-2.852	-0.424782	-0.565426	-0.463918	-0.61081	-0.447161	-0.623746			18.9	-0.459637	-0.586143	-0.71993		18.942	-0.547713	-0.738895	-0.892672
1.1835	-0.0819	1.11528	-0.89654	4.04378	-0.98078	4.0771	-1.0048	4.02146	-0.95022	4.05049	-0.96435		-2.838	-0.420608	-0.56389	-0.459191	-0.609572	-0.442737	-0.623523			19.2	-0.432822	-0.54776	-0.68323		19.173	-0.534892	-0.715264	-0.85141
1.19768	-0.08385	1.12882	-0.89343	4.0891	-1.0042	4.12433	-1.02448	4.0667	-0.97304	4.09746	-0.98399		-2.824	-0.416454	-0.562392	-0.454494	-0.608397	-0.438345	-0.623367			19.4	-0.406298	-0.512145	-0.63448		19.404	-0.513009	-0.680616	-0.802084
1.21186	-0.08591	1.14236	-0.89036	4.13431	-1.02796	4.17138	-1.04467	4.11173	-0.99608	4.14416	-1.00402		-2.81	-0.412321	-0.560932	-0.449827	-0.607283	-0.433982	-0.623279			19.6	-0.379941	-0.478255	-0.57186		19.635	-0.488493	-0.641835	-0.750572
1.22603	-0.08796	1.15592	-0.88725	4.1793	-1.05193	4.21813	-1.06526	4.15674	-1.01944	4.19079	-1.02451		-2.796	-0.408209	-0.559512	-0.445191	-0.606233	-0.42965	-0.623258			19.9	-0.35202	-0.443228	-0.50352		19.866	-0.459967	-0.597091	-0.709821
1.24031	-0.09002	1.16959	-0.88411	4.22428	-1.07623	4.2648	-1.08636	4.20154	-1.04302	4.23715	-1.04538		-2.782	-0.404117	-0.55813	-0.440583	-0.605244	-0.425347	-0.623303			20.1	-0.321592	-0.405066	-0.44917		20.097	-0.432108	-0.539849	-0.672884
1.25449	-0.09208	1.18317	-0.88092	4.26904	-1.10076	4.31117	-1.10786	4.24624	-1.06692	4.28333	-1.06672		-2.768	-0.400046	-0.556786	-0.436005	-0.604317	-0.421074	-0.623413			20.3	-0.289727	-0.364094	-0.41856		20.328	-0.403923	-0.494113	-0.616503
1.26867	-0.09414	1.19676	-0.87772	4.31358	-1.12561	4.35726	-1.12985	4.29072	-1.09104	4.32924	-1.08841		-2.754	-0.395996	-0.55548	-0.431456	-0.603452	-0.416831	-0.62359			20.6	-0.258725	-0.322667	-0.39881		20.559	-0.377153	-0.449691	-0.570686
1.28284	-0.0963	1.21037	-0.87459	4.3581	-1.15069	4.40325	-1.15222	4.33519	-1.11538	4.37507	-1.11047		-2.74	-0.391965	-0.554211	-0.426936	-0.602648	-0.412618	-0.623832			20.8	-0.232666	-0.286561	-0.3739		20.79	-0.35013	-0.414332	-0.520645
1.29702	-0.09846	1.22399	-0.87147	4.40241	-1.176	4.44896	-1.17498	4.37944	-1.14003	4.42063	-1.13298		-2.726	-0.387956	-0.552981	-0.422446	-0.601906	-0.408434	-0.624139			21	-0.212498	-0.258248	-0.334694		21.021	-0.329461	-0.380275	-0.475593
1.31109	-0.10052	1.23752	-0.86822	4.4465	-1.20163	4.49437	-1.19821	4.42358	-1.16501	4.46601	-1.15593		-2.712	-0.383967	-0.551788	-0.417984	-0.601225	-0.404279	-0.624509			21.3	-0.193214	-0.232226	-0.278778		21.252	-0.305467	-0.355322	-0.438907
1.32516	-0.10278	1.25106	-0.86513	4.49057	-1.2276	4.5397	-1.22192	4.46751	-1.19011	4.51112	-1.17914		-2.698	-0.379999	-0.550633	-0.413552	-0.600605	-0.400153	-0.624945			21.5	-0.172002	-0.205191	-0.222463		21.483	-0.282045	-0.332064	-0.404946
1.33924	-0.10495	1.26462	-0.86191	4.53441	-1.25369	4.58473	-1.2459	4.51132	-1.21554	4.55604	-1.20279		-2.684	-0.376052	-0.549516	-0.409148	-0.600045	-0.396055	-0.625443			21.7	-0.149828	-0.178429	-0.186538		21.714	-0.259255	-0.31112	-0.357691
1.35341	-0.10722	1.27829	-0.85873	4.57814	-1.28011	4.62957	-1.27033	4.55502	-1.24128	4.6008	-1.22687		-2.67	-0.372125	-0.548435	-0.404774	-0.599546	-0.391985	-0.626005			21.9	-0.126274	-0.151009	-0.169587		21.945	-0.244107	-0.293986	-0.31072
1.36758	-0.10949	1.29197	-0.85553	4.62165	-1.30686	4.67413	-1.29523	4.5986	-1.26714	4.64537	-1.2512		-2.656	-0.368219	-0.547392	-0.400427	-0.599107	-0.387945	-0.626629			22.2	-0.103178	-0.12441	-0.159111		22.176	-0.23216	-0.269836	-0.268764
1.38186	-0.11176	1.30577	-0.85231	4.66503	-1.33384	4.71849	-1.32048	4.64197	-1.29343	4.68967	-1.27605		-2.642	-0.364333	-0.546386	-0.39611	-0.598727	-0.383931	-0.627315			22.4	-0.0848744	-0.10336	-0.14455		22.407	-0.220343	-0.245811	-0.245868
1.39603	-0.11403	1.31949	-0.84905	4.7083	-1.36106	4.76266	-1.34608	4.68522	-1.31984	4.73379	-1.30113		-2.628	-0.360468	-0.545417	-0.39182	-0.598407	-0.379946	-0.628062			22.6	-0.072403	-0.0885049	-0.11908		22.638	-0.206877	-0.220919	-0.236891
1.4101	-0.1164	1.33311	-0.84589	4.75134	-1.3886	4.80654	-1.37213	4.72826	-1.34657	4.77763	-1.32664		-2.614	-0.356625	-0.544486	-0.387559	-0.598146	-0.375988	-0.628871			22.9	-0.061641	-0.074294	-0.08292		22.869	-0.194205	-0.197757	-0.231091
1.42427	-0.11878	1.34686	-0.84272	4.79415	-1.41638	4.85013	-1.39853	4.77117	-1.37353	4.8213	-1.35247		-2.6	-0.352801	-0.543592	-0.383326	-0.597943	-0.372057	-0.629739			23.1	-0.047725	-0.055262	-0.04565		23.1	-0.178858	-0.179018	-0.218791
1.43824	-0.12105	1.36041	-0.83945	4.83694	-1.44439	4.89363	-1.42526	4.81397	-1.40081	4.86479	-1.37872		-2.586	-0.348998	-0.542733	-0.379121	-0.5978	-0.368153	-0.630668			23.3	-0.03229	-0.035139	-0.02558		23.331	-0.164541	-0.162144	-0.203554
1.45231	-0.12342	1.37409	-0.83626	4.87951	-1.47273	4.93684	-1.45243	4.85656	-1.42821	4.908	-1.40519		-2.572	-0.345217	-0.541913	-0.374943	-0.597714	-0.364277	-0.631656			23.6	-0.018166	-0.018748	-0.02365		23.562	-0.151182	-0.149709	-0.185461
1.46638	-0.1259	1.38778	-0.83317	4.92184	-1.50131	4.97976	-1.47993	4.89902	-1.45604	4.95104	-1.43216		-2.558	-0.341456	-0.541129	-0.370794	-0.597687	-0.360427	-0.632703			23.8	-0.005724	-0.00599	-0.02297		23.793	-0.140778	-0.142991	-0.169709
1.48034	-0.12828	1.40139	-0.82997	4.96405	-1.53012	5.0225	-1.50776	4.94126	-1.48399	4.9938	-1.45935		-2.544	-0.337716	-0.540381	-0.366671	-0.597716	-0.356603	-0.633807			24	0.004351	0.003797	-0.01196		24.024	-0.135655	-0.138538	-0.155533
1.49441	-0.13076	1.41511	-0.82685	5.00604	-1.55926	5.06494	-1.53602	4.98339	-1.51226	5.03638	-1.48694		-2.53	-0.333997	-0.53967	-0.362577	-0.597802	-0.352805	-0.63497			24.3	0.010664	0.009893	0.00624		24.255	-0.131179	-0.134368	-0.143155
1.50837	-0.13324	1.42876	-0.82371	5.04789	-1.58864	5.10719	-1.56461	5.02539	-1.54076	5.07879	-1.51484		-2.516	-0.330299	-0.538996	-0.358509	-0.597945	-0.349033	-0.636189			24.5	0.011863	0.010986	0.0187		24.486	-0.122519	-0.129949	-0.129552
1.52244	-0.13572	1.44252	-0.82052	5.08962	-1.61826	5.14926	-1.59351	5.06718	-1.56948	5.12092	-1.54304		-2.502	-0.326622	-0.538359	-0.354469	-0.598144	-0.345288	-0.637464			24.7	0.009791	0.009479	0.02105		24.717	-0.116301	-0.123801	-0.116912
1.53661	-0.1383	1.45639	-0.81741	5.13111	-1.64821	5.19104	-1.62283	5.10874	-1.59852	5.16278	-1.57163		-2.488	-0.322966	-0.537757	-0.350456	-0.598399	-0.341567	-0.638794			24.9	0.007307	0.008632	0.01605		24.948	-0.11222	-0.118052	-0.108953
1.55078	-0.14079	1.47028	-0.81418	5.17237	-1.6784	5.23252	-1.65247	5.15018	-1.62779	5.20446	-1.60052		-2.474	-0.31933	-0.537193	-0.34647	-0.59871	-0.337872	-0.64018			25.2	0.007449	0.011035	0.01134		25.179	-0.107657	-0.111887	-0.103327
1.56484	-0.14338	1.4841	-0.81104	5.2135	-1.70882	5.27382	-1.68242	5.1914	-1.65729	5.24587	-1.62971		-2.46	-0.315716	-0.536664	-0.34251	-0.599075	-0.334201	-0.64162			25.4	0.010651	0.015805	0.01165		25.41	-0.103704	-0.105347	-0.098959
1.57891	-0.14596	1.49792	-0.80791	5.2544	-1.73948	5.31483	-1.71268	5.2325	-1.68701	5.2871	-1.65918		-2.446	-0.312123	-0.536172	-0.338578	-0.599495	-0.330556	-0.643113			25.6	0.013237	0.017791	0.01392		25.641	-0.102598	-0.099865	-0.096234
1.59307	-0.14865	1.51187	-0.80487	5.29516	-1.77048	5.35565	-1.74335	5.27347	-1.71705	5.32816	-1.68904		-2.432	-0.308552	-0.535716	-0.334672	-0.599968	-0.326935	-0.644659			25.9	0.013765	0.015847	0.01726		25.872	-0.100892	-0.09688	-0.096664
1.60703	-0.15124	1.52564	-0.80176	5.33569	-1.80172	5.39618	-1.77432	5.31422	-1.74732	5.36894	-1.71919		-2.418	-0.305002	-0.535296	-0.330792	-0.600495	-0.323338	-0.646258			26.1	0.012185	0.011365	0.01631		26.103	-0.098956	-0.095352	-0.097569
1.62099	-0.15393	1.53942	-0.79875	5.37598	-1.8332	5.43643	-1.8056	5.35474	-1.77781	5.40945	-1.74962		-2.404	-0.301473	-0.534911	-0.326938	-0.601075	-0.319766	-0.647907			26.3	0.009329	0.006928	0.01037		26.334	-0.096373	-0.09576	-0.09864
1.63506	-0.15662	1.55333	-0.7957	5.41613	-1.86491	5.47648	-1.83718	5.39514	-1.80853	5.44979	-1.78034		-2.39	-0.297964	-0.534563	-0.323111	-0.601708	-0.316217	-0.649608			26.6	0.006609	0.005185	0.00687		26.565	-0.093012	-0.095601	-0.098179
1.64912	-0.15931	1.56725	-0.79264	5.45604	-1.89696	5.51624	-1.86916	5.43531	-1.83957	5.48985	-1.81142		-2.376	-0.294478	-0.53425	-0.319309	-0.602393	-0.312692	-0.651358			26.8	0.00398	0.005278	0.00746		26.796	-0.089222	-0.095197	-0.096004
1.66328	-0.16211	1.58129	-0.78967	5.49582	-1.92926	5.55582	-1.90143	5.47526	-1.87073	5.52964	-1.84269		-2.362	-0.291013	-0.533973	-0.315534	-0.603129	-0.30919	-0.653158			27	0.003078	0.007073	0.01099		27.027	-0.085397	-0.092838	-0.089077
1.67734	-0.1648	1.59525	-0.78662	5.53536	-1.96179	5.5951	-1.934	5.51508	-1.90222	5.56926	-1.87433		-2.348	-0.287569	-0.533732	-0.311784	-0.603916	-0.305712	-0.655007			27.3	0.005572	0.01074	0.01405		27.258	-0.08235	-0.090006	-0.080727
1.6914	-0.1676	1.60923	-0.78369	5.57465	-1.99456	5.6341	-1.96686	5.55468	-1.93393	5.6086	-1.90624		-2.334	-0.284147	-0.533526	-0.308059	-0.604754	-0.302258	-0.656903			27.5	0.009657	0.013597	0.01288		27.489	-0.079498	-0.085362	-0.073266
1.70536	-0.17039	1.62314	-0.78077	5.6138	-2.02756	5.6729	-2.00001	5.59415	-1.96587	5.64778	-1.93841		-2.32	-0.280746	-0.533355	-0.304361	-0.605642	-0.298826	-0.658846			27.7	0.010698	0.011277	0.00606		27.72	-0.075146	-0.080655	-0.067477
1.71932	-0.17319	1.63706	-0.77787	5.65271	-2.06091	5.71142	-2.03355	5.63338	-1.99813	5.68668	-1.97096		-2.306	-0.277367	-0.53322	-0.300687	-0.606579	-0.295415	-0.660836			28	0.006648	0.003671	-0.00164		27.951	-0.070484	-0.075163	-0.064645
1.73328	-0.17608	1.65099	-0.77507	5.69138	-2.0945	5.74964	-2.06738	5.67239	-2.03051	5.72531	-2.00366		-2.292	-0.274009	-0.53312	-0.297039	-0.607565	-0.292028	-0.662871			28.2	0.000465	-0.003756	-0.00327		28.182	-0.066851	-0.070438	-0.062835
1.74723	-0.17888	1.66495	-0.77218	5.7299	-2.12832	5.78768	-2.10149	5.71128	-2.06321	5.76377	-2.03673		-2.278	-0.270674	-0.533054	-0.293417	-0.608599	-0.288664	-0.664951			28.4	-0.004391	-0.006921	-0.00042		28.413	-0.062834	-0.066413	-0.061987
1.76119	-0.18178	1.67893	-0.76941	5.76807	-2.16239	5.82532	-2.13588	5.74993	-2.09614	5.80195	-2.07006		-2.264	-0.267359	-0.533024	-0.289819	-0.609681	-0.285321	-0.667075			28.6	-0.00602	-0.005409	0.00218		28.644	-0.05887	-0.063599	-0.061918
1.77515	-0.18468	1.69293	-0.76662	5.8061	-2.19669	5.86278	-2.17054	5.78836	-2.12928	5.83987	-2.10364		-2.25	-0.264066	-0.533029	-0.286245	-0.610811	-0.282001	-0.669242			28.9	-0.005818	-0.002976	-0.00071		28.875	-0.055932	-0.061267	-0.060213
1.78921	-0.18768	1.70705	-0.76392	5.84398	-2.23123	5.90004	-2.20549	5.82665	-2.16265	5.87762	-2.13748		-2.236	-0.260795	-0.533067	-0.282697	-0.611986	-0.278701	-0.671452			29.1	-0.004362	-0.001255	-0.00533		29.106	-0.053329	-0.059617	-0.057792
1.80326	-0.19058	1.72119	-0.76113	5.88151	-2.2661	5.93691	-2.24081	5.86471	-2.19624	5.9151	-2.17157		-2.222	-0.257545	-0.53314	-0.279173	-0.613208	-0.275423	-0.673704			29.3	-0.001587	0.000148	-0.00647		29.337	-0.050986	-0.058614	-0.05427
1.81732	-0.19359	1.73535	-0.75846	5.91889	-2.30112	5.97359	-2.2763	5.90255	-2.23004	5.95231	-2.20591		-2.208	-0.254319	-0.533247	-0.275675	-0.614475	-0.272167	-0.675995			29.6	0.000974	0.000284	-0.00507		29.568	-0.048836	-0.056014	-0.052507
1.83128	-0.19659	1.74943	-0.75582	5.95602	-2.33646	6.00998	-2.31216	5.94015	-2.26417	5.98926	-2.24059		-2.194	-0.251113	-0.533389	-0.272199	-0.615787	-0.268931	-0.678328			29.8	0.003605	0.000942	0.00149		29.799	-0.04675	-0.05395	-0.047717
1.84533	-0.1996	1.76362	-0.7532	5.9929	-2.37205	6.04608	-2.34829	5.97762	-2.29841	6.02604	-2.27542		-2.18	-0.247929	-0.533563	-0.268749	-0.617143	-0.265717	-0.6807			30	0.005052	0.002041	0.0084		30.03	-0.044966	-0.05142	-0.04404
1.85919	-0.2027	1.77764	-0.75072	6.02963	-2.40786	6.08199	-2.38468	6.01486	-2.33297	6.06255	-2.31059		-2.166	-0.244768	-0.533772	-0.265323	-0.618542	-0.262524	-0.68311			30.3	0.005009	0.003629	0.01137		30.261	-0.043203	-0.049309	-0.040143
1.87314	-0.20571	1.79178	-0.74817	6.06601	-2.44381	6.11751	-2.42123	6.05187	-2.36764	6.09879	-2.3459		-2.152	-0.241627	-0.534014	-0.26192	-0.619985	-0.259351	-0.685556			30.5	0.005962	0.007816	0.01236		30.492	-0.042245	-0.047724	-0.039017
1.88709	-0.20881	1.80593	-0.7457	6.10224	-2.48009	6.15284	-2.45814	6.08865	-2.40263	6.13477	-2.38154		-2.138	-0.23851	-0.534289	-0.258543	-0.621469	-0.256199	-0.688041			30.7	0.008395	0.013247	0.01157		30.723	-0.041699	-0.046876	-0.037973
1.90115	-0.21192	1.82021	-0.74325	6.13821	-2.5166	6.18788	-2.49531	6.1253	-2.43783	6.17059	-2.41741		-2.124	-0.235414	-0.534598	-0.255188	-0.622995	-0.253067	-0.690562			31	0.011259	0.016992	0.01187		30.954	-0.040669	-0.046547	-0.037427
1.9151	-0.21513	1.83441	-0.74093	6.17393	-2.55344	6.22263	-2.53282	6.16161	-2.47314	6.20604	-2.45342		-2.11	-0.232341	-0.534939	-0.251857	-0.624562	-0.249955	-0.693118			31.2	0.01227	0.016069	0.01257		31.185	-0.039676	-0.046576	-0.038135
1.92905	-0.21824	1.84862	-0.73853	6.20949	-2.59041	6.25719	-2.57049	6.1978	-2.50877	6.24134	-2.48975		-2.096	-0.229289	-0.535313	-0.248551	-0.62617	-0.246863	-0.695707			31.4	0.011125	0.011441	0.01287		31.416	-0.03842	-0.046456	-0.038897
1.943	-0.22145	1.86285	-0.73628	6.2447	-2.6276	6.29136	-2.6084	6.23375	-2.5446	6.27637	-2.5263		-2.082	-0.226259	-0.535719	-0.245267	-0.627817	-0.243791	-0.698331			31.6	0.009431	0.007165	0.01289		31.647	-0.036993	-0.045659	-0.040055
1.95685	-0.22466	1.877	-0.73406	6.27976	-2.66502	6.32535	-2.64655	6.26948	-2.58065	6.31114	-2.56307		-2.068	-0.223252	-0.536157	-0.242007	-0.629503	-0.240739	-0.700987			31.9	0.007123	0.004555	0.01024		31.878	-0.036482	-0.045188	-0.040107
1.9707	-0.22777	1.89116	-0.73178	6.31447	-2.70265	6.35895	-2.68494	6.30507	-2.61679	6.34576	-2.59996		-2.054	-0.220266	-0.536627	-0.23877	-0.631227	-0.237706	-0.703676			32.1	0.00357	0.002693	0.00501		32.109	-0.035487	-0.044738	-0.039979
1.98455	-0.23108	1.90534	-0.72972	6.34902	-2.7405	6.39236	-2.72355	6.34033	-2.65325	6.38002	-2.63717		-2.04	-0.217303	-0.537129	-0.235557	-0.632988	-0.234692	-0.706395
1.9984	-0.23429	1.91954	-0.72756	6.38332	-2.77857	6.4255	-2.7624	6.37547	-2.6899	6.41413	-2.67458		-2.026	-0.214362	-0.537662	-0.232366	-0.634787	-0.231699	-0.709145
2.01235	-0.2376	1.93386	-0.72552	6.41737	-2.81685	6.45835	-2.80147	6.41037	-2.72676	6.44798	-2.7122		-2.012	-0.211443	-0.538225	-0.2292	-0.636622	-0.228724	-0.711923
2.0263	-0.24092	1.94819	-0.72347	6.45106	-2.85535	6.49082	-2.84076	6.44495	-2.76371	6.48148	-2.74992		-1.998	-0.208546	-0.53882	-0.226055	-0.638492	-0.225768	-0.714731
2.04035	-0.24423	1.96264	-0.72144	6.48461	-2.89404	6.52311	-2.88026	6.4794	-2.80096	6.51484	-2.78794		-1.984	-0.205672	-0.539445	-0.222934	-0.640397	-0.222831	-0.717566
2.04035	-0.24423	1.96264	-0.72144	6.5179	-2.93294	6.55513	-2.91996	6.51363	-2.83831	6.54794	-2.82605		-1.97	-0.202819	-0.5401	-0.219835	-0.642337	-0.219913	-0.720429
2.05427	-0.24771	1.977	-0.71961	6.55106	-2.97204	6.58698	-2.95987	6.54763	-2.87594	6.58081	-2.86445		-1.956	-0.19999	-0.540785	-0.21676	-0.644309	-0.217014	-0.723317
2.06822	-0.25103	1.99138	-0.71767	6.58386	-3.01133	6.61846	-2.99997	6.5815	-2.91367	6.61353	-2.90293		-1.942	-0.197182	-0.5415	-0.213707	-0.646315	-0.214134	-0.72623
2.08207	-0.25444	2.00568	-0.71586	6.61642	-3.05071	6.64968	-3.04016	6.61506	-2.95158	6.64592	-2.9416		-1.928	-0.194397	-0.542243	-0.210676	-0.648352	-0.211272	-0.729167
2.09592	-0.25786	2.02	-0.71408	6.64874	-3.09038	6.68063	-3.08063	6.64839	-2.98968	6.67807	-2.98044		-1.914	-0.191634	-0.543016	-0.207668	-0.65042	-0.208428	-0.732128
2.10976	-0.26138	2.03433	-0.71244	6.68082	-3.13012	6.71134	-3.12116	6.6815	-3.02795	6.70998	-3.01945		-1.9	-0.188893	-0.543817	-0.204682	-0.652519	-0.205602	-0.735113
2.12371	-0.2648	2.04877	-0.71072	6.71267	-3.17014	6.74179	-3.16197	6.7145	-3.06641	6.74177	-3.05862		-1.886	-0.186175	-0.544646	-0.201718	-0.654648	-0.202796	-0.738119
2.13755	-0.26832	2.06313	-0.70913	6.74429	-3.21023	6.772	-3.20282	6.74718	-3.10504	6.77324	-3.09796		-1.872	-0.183479	-0.545503	-0.198777	-0.656805	-0.200006	-0.741145
2.1514	-0.27174	2.0775	-0.70747	6.77568	-3.25048	6.80197	-3.24382	6.77964	-3.14374	6.80448	-3.13734		-1.858	-0.180806	-0.546388	-0.195858	-0.658991	-0.197236	-0.744192
2.16524	-0.27536	2.09189	-0.70603	6.80684	-3.29088	6.83171	-3.28496	6.812	-3.1827	6.83561	-3.17698		-1.844	-0.178154	-0.547299	-0.192962	-0.661204	-0.194483	-0.747259
2.17899	-0.27888	2.10619	-0.70453	6.83779	-3.33133	6.86122	-3.32612	6.84405	-3.22173	6.86643	-3.21665		-1.83	-0.175526	-0.548238	-0.190087	-0.663445	-0.191748	-0.750343
2.19283	-0.2824	2.1206	-0.70306	6.86852	-3.37203	6.89053	-3.3675	6.87589	-3.26092	6.89704	-3.25647		-1.816	-0.172919	-0.549201	-0.187234	-0.665711	-0.189031	-0.753445
2.20668	-0.28603	2.13503	-0.70171	6.89895	-3.41274	6.91952	-3.40887	6.90753	-3.30027	6.92745	-3.29641		-1.802	-0.170336	-0.550191	-0.184404	-0.668002	-0.186331	-0.756565
2.22052	-0.28965	2.14946	-0.7004	6.92928	-3.45359	6.94843	-3.45034	6.93896	-3.33966	6.95767	-3.33637		-1.788	-0.167773	-0.551207	-0.181595	-0.670319	-0.18365	-0.7597
2.23436	-0.29328	2.16391	-0.69911	6.9593	-3.49455	6.97704	-3.49188	6.9703	-3.37931	6.98779	-3.37654		-1.774	-0.165234	-0.552248	-0.178808	-0.672658	-0.180986	-0.76285
2.2481	-0.297	2.17827	-0.69796	6.98925	-3.53561	7.00558	-3.53349	7.00135	-3.41899	7.01764	-3.41672		-1.76	-0.162718	-0.553313	-0.176042	-0.675021	-0.17834	-0.766015
2.26195	-0.30063	2.19274	-0.69674	7.01891	-3.57666	7.03386	-3.57504	7.03221	-3.45882	7.0473	-3.45701		-1.746	-0.160222	-0.554403	-0.173299	-0.677405	-0.175711	-0.769193
2.27569	-0.30436	2.20713	-0.69565	7.0484	-3.61781	7.06199	-3.61663	7.06278	-3.49867	7.07669	-3.49728		-1.732	-0.157751	-0.555516	-0.170577	-0.679812	-0.1731	-0.772384
2.28953	-0.30809	2.22162	-0.69459	7.07772	-3.65901	7.08997	-3.65822	7.09326	-3.53874	7.10602	-3.53773		-1.718	-0.155301	-0.556652	-0.167876	-0.682238	-0.170507	-0.775586
2.30327	-0.31182	2.23603	-0.69357	7.10689	-3.70017	7.11784	-3.69971	7.12357	-3.57884	7.13519	-3.57815		-1.704	-0.152873	-0.55781	-0.165197	-0.684685	-0.167932	-0.778801
2.31711	-0.31555	2.25055	-0.69258	7.13591	-3.74144	7.14559	-3.74126	7.15361	-3.61905	7.16411	-3.61864		-1.69	-0.150468	-0.558992	-0.16254	-0.687151	-0.165372	-0.782024
2.33085	-0.31938	2.26497	-0.69171	7.1647	-3.78265	7.17316	-3.78266	7.18357	-3.65925	7.193	-3.65906		-1.676	-0.148085	-0.560196	-0.159904	-0.689636	-0.162832	-0.785258
2.34459	-0.32321	2.27941	-0.69088	7.19348	-3.8237	7.20076	-3.82384	7.21327	-3.69953	7.22165	-3.69952		-1.662	-0.145724	-0.56142	-0.15729	-0.692138	-0.160307	-0.7885
2.35843	-0.32704	2.29396	-0.69009	7.22206	-3.86482	7.22822	-3.86502	7.24282	-3.73988	7.25019	-3.73998		-1.648	-0.143385	-0.562666	-0.154697	-0.694657	-0.157801	-0.791749
2.37217	-0.33088	2.30841	-0.68933	7.2506	-3.90563	7.2557	-3.90583	7.27223	-3.78031	7.27863	-3.78046		-1.634	-0.14107	-0.563932	-0.152125	-0.697191	-0.155313	-0.795006
2.3859	-0.33481	2.32288	-0.6887	7.27917	-3.94632	7.28328	-3.94643	7.30152	-3.82061	7.30699	-3.82077		-1.62	-0.138775	-0.565218	-0.149575	-0.699742	-0.152841	-0.798269
2.39964	-0.33865	2.33735	-0.688002	7.30774	-3.9868	7.31084	-3.98685	7.33074	-3.86096	7.33532	-3.86109		-1.606	-0.136504	-0.566523	-0.147046	-0.702306	-0.150387	-0.801537
2.41338	-0.34258	2.35183	-0.687441	7.3367	-4.02697	7.33887	-4.02676	7.35979	-3.90117	7.36353	-3.90119		-1.592	-0.134254	-0.567848	-0.144539	-0.704884	-0.147951	-0.80481
2.42712	-0.34652	2.36633	-0.686913	7.36609	-4.0671	7.36624	-4.06714	7.38899	-3.94141	7.39185	-3.94139		-1.578	-0.132027	-0.56919	-0.142052	-0.707475	-0.145531	-0.808086
2.44085	-0.35056	2.38083	-0.686518										-1.564	-0.129822	-0.570551	-0.139587	-0.710079	-0.14313	-0.811365
2.45449	-0.35449	2.39523	-0.686057										-1.55	-0.127639	-0.571929	-0.137143	-0.712692	-0.140744	-0.814647
2.46823	-0.35853	2.40975	-0.685732										-1.536	-0.125478	-0.573324	-0.13472	-0.715318	-0.138377	-0.81793
2.48196	-0.36257	2.42427	-0.685442										-1.522	-0.12334	-0.574735	-0.132318	-0.717953	-0.136028	-0.821214
2.4956	-0.36662	2.4387	-0.685186										-1.508	-0.121223	-0.576161	-0.129938	-0.720597	-0.133696	-0.824497
2.50933	-0.37066	2.45324	-0.684965										-1.494	-0.119128	-0.577604	-0.127579	-0.723249	-0.131381	-0.82778
2.52296	-0.3748	2.46768	-0.684877										-1.48	-0.117056	-0.57906	-0.12524	-0.725908	-0.129083	-0.83106
2.5367	-0.37895	2.48223	-0.684825										-1.466	-0.115005	-0.580531	-0.122923	-0.728575	-0.126804	-0.834338
2.55033	-0.38309	2.49668	-0.684807										-1.452	-0.112976	-0.582015	-0.120627	-0.731247	-0.124541	-0.837614
2.56406	-0.38724	2.51124	-0.684824										-1.438	-0.110968	-0.583512	-0.118352	-0.733925	-0.122297	-0.840885
2.57769	-0.39138	2.52571	-0.684874										-1.424	-0.108984	-0.585022	-0.116098	-0.736606	-0.120069	-0.844151
2.59133	-0.39563	2.54018	-0.68506										-1.41	-0.107021	-0.586543	-0.113865	-0.739292	-0.117861	-0.847412
2.60496	-0.39988	2.55466	-0.685282										-1.396	-0.105079	-0.588076	-0.111653	-0.741981	-0.115668	-0.850666
2.61859	-0.40413	2.56914	-0.685539										-1.382	-0.10316	-0.589619	-0.109462	-0.744671	-0.113494	-0.853914
2.63222	-0.40838	2.58363	-0.68583										-1.368	-0.101262	-0.591172	-0.107292	-0.747363	-0.111339	-0.857154
2.64585	-0.41273	2.59812	-0.686257										-1.354	-0.099385	-0.592735	-0.105143	-0.750055	-0.1092	-0.860386
2.65948	-0.41698	2.61261	-0.686617										-1.34	-0.09753	-0.594307	-0.103015	-0.752747	-0.107081	-0.863608
2.67311	-0.42134	2.62711	-0.687112										-1.326	-0.095697	-0.595886	-0.100908	-0.755438	-0.104978	-0.866821
2.68673	-0.42569	2.64161	-0.687643										-1.312	-0.0938855	-0.597474	-0.098823	-0.758127	-0.102894	-0.870022
2.70036	-0.43015	2.65612	-0.688308										-1.298	-0.0920955	-0.599069	-0.096758	-0.760815	-0.100828	-0.873213
2.71389	-0.4345	2.67053	-0.688909										-1.284	-0.090327	-0.600669	-0.094715	-0.763498	-0.0987805	-0.876392
2.72752	-0.43896	2.68504	-0.689645										-1.27	-0.0885795	-0.602277	-0.092692	-0.766178	-0.096751	-0.879558
2.74104	-0.44342	2.69945	-0.690413										-1.256	-0.086854	-0.603889	-0.0906905	-0.768853	-0.09474	-0.882711
2.75467	-0.44788	2.71397	-0.691216										-1.242	-0.0851495	-0.605506	-0.0887105	-0.771523	-0.092747	-0.88585
2.76819	-0.45234	2.72839	-0.692055										-1.228	-0.0834665	-0.607127	-0.0867515	-0.774187	-0.0907725	-0.888974
2.78172	-0.4569	2.74281	-0.693029										-1.214	-0.081804	-0.608752	-0.084813	-0.776844	-0.088817	-0.892082
2.79534	-0.46146	2.75733	-0.694038										-1.2	-0.080163	-0.61038	-0.0828955	-0.779492	-0.08688	-0.895175
2.80887	-0.46602	2.77175	-0.695081										-1.186	-0.0785435	-0.612009	-0.081	-0.782133	-0.0849615	-0.898251
2.82239	-0.47059	2.78618	-0.696158										-1.172	-0.076945	-0.613641	-0.0791255	-0.784765	-0.083062	-0.90131
2.83591	-0.47515	2.80061	-0.697268										-1.158	-0.0753675	-0.615273	-0.077272	-0.787386	-0.081181	-0.90435
2.84943	-0.47982	2.81503	-0.698513										-1.144	-0.0738105	-0.616906	-0.0754395	-0.789998	-0.0793195	-0.907372
2.86295	-0.48449	2.82946	-0.69979										-1.13	-0.0722745	-0.618538	-0.0736285	-0.792598	-0.077477	-0.910375
2.87648	-0.48916	2.84389	-0.701105										-1.116	-0.0707595	-0.62017	-0.0718385	-0.795187	-0.0756535	-0.913358
2.8899	-0.49383	2.85822	-0.702452										-1.102	-0.0692655	-0.6218	-0.0700695	-0.797762	-0.0738495	-0.91632
2.90342	-0.4985	2.87265	-0.703833										-1.088	-0.0677925	-0.623429	-0.0683225	-0.800325	-0.0720645	-0.919261
2.91694	-0.50327	2.88708	-0.705349										-1.074	-0.0663395	-0.625055	-0.0665965	-0.802874	-0.070299	-0.922181
2.93035	-0.50804	2.90141	-0.706895										-1.06	-0.064908	-0.626677	-0.0648915	-0.805407	-0.0685535	-0.925078
2.94387	-0.51282	2.91583	-0.708475										-1.046	-0.063496	-0.628296	-0.0632085	-0.807926	-0.0668265	-0.927952
2.95729	-0.51759	2.93016	-0.71009										-1.032	-0.0621055	-0.629911	-0.0615465	-0.810429	-0.06512	-0.930802
2.97081	-0.52237	2.94459	-0.711739										-1.018	-0.0607355	-0.63152	-0.0599055	-0.812915	-0.0634335	-0.933629
2.98423	-0.52724	2.95891	-0.713521										-1.004	-0.059385	-0.633123	-0.0582865	-0.815383	-0.061767	-0.936431
2.99764	-0.53212	2.97324	-0.715337										-0.99	-0.0580555	-0.634721	-0.056689	-0.817835	-0.06012	-0.939207
3.01106	-0.537	2.98756	-0.717184										-0.976	-0.0567465	-0.636312	-0.0551125	-0.820267	-0.0584935	-0.941958
3.02447	-0.54188	3.00188	-0.719063										-0.962	-0.0554575	-0.637895	-0.053558	-0.82268	-0.0568875	-0.944683
3.03789	-0.54686	3.0162	-0.721075										-0.948	-0.054189	-0.639471	-0.0520255	-0.825073	-0.055301	-0.94738
3.0513	-0.55185	3.03052	-0.72312										-0.934	-0.05294	-0.641037	-0.0505135	-0.827446	-0.053735	-0.950051
3.06471	-0.55683	3.04484	-0.725197										-0.92	-0.0517115	-0.642594	-0.0490235	-0.829797	-0.05219	-0.952692
3.07812	-0.56182	3.05915	-0.727307										-0.906	-0.050503	-0.644143	-0.0475555	-0.832127	-0.0506655	-0.955307
3.09144	-0.5668	3.07336	-0.729449										-0.892	-0.0493145	-0.64568	-0.0461085	-0.834435	-0.049162	-0.95789
3.10485	-0.57179	3.08767	-0.731623										-0.878	-0.048146	-0.647207	-0.044684	-0.83672	-0.0476795	-0.960446
3.11826	-0.57688	3.10198	-0.733927										-0.864	-0.0469975	-0.648723	-0.0432805	-0.838981	-0.046217	-0.96297
3.13157	-0.58197	3.11618	-0.736263										-0.85	-0.045869	-0.650226	-0.0418995	-0.841218	-0.044776	-0.965466
3.14498	-0.58706	3.13048	-0.738631										-0.836	-0.0447595	-0.651717	-0.04054	-0.843431	-0.0433565	-0.967929
3.15829	-0.59225	3.14468	-0.74113										-0.822	-0.04367	-0.653194	-0.039202	-0.845618	-0.041958	-0.97036
3.17159	-0.59735	3.15887	-0.743561										-0.808	-0.0426005	-0.654659	-0.037886	-0.847779	-0.0405805	-0.97276
3.1849	-0.60254	3.17306	-0.746122										-0.794	-0.0415505	-0.656108	-0.036592	-0.849914	-0.039225	-0.975129
3.19821	-0.60774	3.18725	-0.748714										-0.78	-0.04052	-0.657544	-0.03532	-0.852023	-0.037891	-0.977463
3.21151	-0.61293	3.20143	-0.751336										-0.766	-0.039509	-0.658964	-0.03407	-0.854103	-0.0365785	-0.979764
3.22482	-0.61813	3.21561	-0.753989										-0.752	-0.0385175	-0.660368	-0.032842	-0.856157	-0.035288	-0.982031
3.23812	-0.62343	3.22979	-0.75677										-0.738	-0.0375455	-0.661756	-0.031636	-0.858181	-0.034019	-0.984265
3.25143	-0.62873	3.24396	-0.75958										-0.724	-0.036593	-0.663127	-0.030452	-0.860176	-0.032772	-0.986463
3.26473	-0.63403	3.25813	-0.76243										-0.71	-0.035659	-0.664481	-0.02929	-0.862142	-0.0315475	-0.988627
3.27793	-0.63934	3.27219	-0.7653										-0.696	-0.034745	-0.665817	-0.0281505	-0.864077	-0.030345	-0.990754
3.29123	-0.64464	3.28635	-0.7682										-0.682	-0.03385	-0.667135	-0.0270325	-0.865983	-0.0291645	-0.992846
3.30444	-0.65005	3.3004	-0.77123										-0.668	-0.032974	-0.668434	-0.025937	-0.867857	-0.0280065	-0.994902
3.31774	-0.65546	3.31455	-0.77429										-0.654	-0.0321175	-0.669714	-0.024864	-0.8697	-0.0268705	-0.996922
3.33094	-0.66086	3.3286	-0.77738										-0.64	-0.031279	-0.670974	-0.023813	-0.871511	-0.025758	-0.998903
3.34414	-0.66627	3.34264	-0.78049										-0.626	-0.0304605	-0.672214	-0.022785	-0.87329	-0.024668	-1.00085
3.35733	-0.67178	3.35667	-0.78374										-0.612	-0.0296605	-0.673434	-0.021779	-0.875035	-0.0236	-1.00275
3.37053	-0.6772	3.3707	-0.78691										-0.598	-0.0288795	-0.674632	-0.020795	-0.876748	-0.022555	-1.00462
3.38373	-0.68271	3.38473	-0.79021										-0.584	-0.0281175	-0.675809	-0.0198335	-0.878426	-0.0215335	-1.00645
3.39692	-0.68823	3.39874	-0.79354										-0.57	-0.027374	-0.676964	-0.018894	-0.880071	-0.0205345	-1.00824
3.41012	-0.69374	3.41276	-0.7969										-0.556	-0.0266495	-0.678096	-0.0179775	-0.881682	-0.019559	-1.01
3.42331	-0.69936	3.42677	-0.80038										-0.542	-0.025944	-0.679206	-0.0170835	-0.883256	-0.0186065	-1.01171
3.43651	-0.70488	3.44077	-0.80379										-0.528	-0.0252565	-0.680292	-0.016212	-0.884795	-0.0176775	-1.01338
3.4496	-0.7105	3.45467	-0.80733										-0.514	-0.024588	-0.681356	-0.0153625	-0.8863	-0.0167715	-1.01501
3.46279	-0.71612	3.46866	-0.8109										-0.5	-0.0239385	-0.682395	-0.014536	-0.887767	-0.015889	-1.0166
3.47588	-0.72175	3.48255	-0.81449										-0.486	-0.023307	-0.68341	-0.013732	-0.889199	-0.01503	-1.01815
3.48897	-0.72747	3.49643	-0.81821										-0.472	-0.022694	-0.684399	-0.012951	-0.890594	-0.014195	-1.01966
3.50216	-0.7332	3.5104	-0.82196										-0.458	-0.0220995	-0.685364	-0.0121925	-0.891951	-0.0133835	-1.02113
3.51525	-0.73882	3.52427	-0.82563										-0.444	-0.0215235	-0.686304	-0.0114565	-0.89327	-0.0125955	-1.02256
3.52834	-0.74455	3.53813	-0.82943										-0.43	-0.020966	-0.687218	-0.010743	-0.894553	-0.0118315	-1.02394
3.54143	-0.75038	3.55198	-0.83335										-0.416	-0.0204265	-0.688105	-0.010053	-0.895797	-0.011092	-1.02529
3.55451	-0.75611	3.56583	-0.8372										-0.402	-0.019906	-0.688966	-0.009385	-0.897002	-0.0103755	-1.02659
3.5676	-0.76195	3.57968	-0.84117										-0.388	-0.019403	-0.689801	-0.00874	-0.898168	-0.0096835	-1.02785
3.58068	-0.76778	3.59351	-0.84517										-0.374	-0.018919	-0.690608	-0.008118	-0.899296	-0.0090155	-1.02906
3.59367	-0.77362	3.60724	-0.84919										-0.36	-0.0184525	-0.691388	-0.007519	-0.900384	-0.0083715	-1.03023
3.60675	-0.77946	3.62107	-0.85324										-0.346	-0.018005	-0.69214	-0.0069425	-0.901432	-0.007752	-1.03136
3.61973	-0.78539	3.63479	-0.85742										-0.332	-0.017575	-0.692864	-0.006389	-0.902441	-0.007157	-1.03245
3.63281	-0.79124	3.6486	-0.86151										-0.318	-0.017163	-0.693561	-0.005858	-0.903409	-0.0065865	-1.03349
3.6458	-0.79718	3.6623	-0.86574										-0.304	-0.0167695	-0.694229	-0.0053505	-0.904338	-0.0060395	-1.03448
3.65877	-0.80312	3.676	-0.86998										-0.29	-0.016394	-0.694868	-0.0048655	-0.905226	-0.0055175	-1.03544
3.67175	-0.80907	3.68969	-0.87425										-0.276	-0.0160365	-0.695478	-0.004404	-0.906072	-0.00502	-1.03635
3.68473	-0.81511	3.70337	-0.87864										-0.262	-0.0156975	-0.69606	-0.003965	-0.906878	-0.004547	-1.03721
3.69771	-0.82106	3.71705	-0.88296										-0.248	-0.015376	-0.696611	-0.003549	-0.907642	-0.004099	-1.03803
3.71068	-0.82711	3.73072	-0.8874										-0.234	-0.015072	-0.697134	-0.0031565	-0.908365	-0.003675	-1.03881
3.72366	-0.83316	3.74438	-0.89186										-0.22	-0.014787	-0.697626	-0.0027865	-0.909046	-0.0032765	-1.03954
3.73653	-0.83931	3.75794	-0.89645										-0.206	-0.0145195	-0.698089	-0.00244	-0.909686	-0.0029025	-1.04022
3.74951	-0.84537	3.77159	-0.90096										-0.192	-0.0142695	-0.698522	-0.002116	-0.910284	-0.0025525	-1.04086
3.76248	-0.85152	3.78523	-0.90559										-0.178	-0.014038	-0.698924	-0.0018155	-0.91084	-0.002228	-1.04146
3.77535	-0.85768	3.79876	-0.91024										-0.164	-0.0138245	-0.699296	-0.0015375	-0.911353	-0.001928	-1.04201
3.78822	-0.86384	3.81229	-0.91491										-0.15	-0.0136285	-0.699638	-0.001283	-0.911824	-0.0016535	-1.04251
3.80119	-0.87	3.82591	-0.91961										-0.136	-0.01345	-0.699948	-0.001052	-0.912253	-0.0014035	-1.04297
3.81406	-0.87616	3.83943	-0.92432										-0.122	-0.01329	-0.700228	-0.000844	-0.912638	-0.001178	-1.04338
3.82693	-0.88242	3.85293	-0.92916										-0.108	-0.0131475	-0.700477	-0.0006585	-0.912982	-0.000978	-1.04375
3.83979	-0.88869	3.86643	-0.93402										-0.094	-0.013023	-0.700696	-0.0004965	-0.913283	-0.000803	-1.04407
3.85266	-0.89496	3.87992	-0.93891										-0.08	-0.0129165	-0.700882	-0.0003575	-0.91354	-0.0006525	-1.04435
3.86552	-0.90123	3.89341	-0.94381										-0.066	-0.0128275	-0.701039	-0.000242	-0.913755	-0.000528	-1.04458
3.87828	-0.9076	3.90679	-0.94883										-0.052	-0.012756	-0.701163	-0.0001495	-0.913928	-0.0004275	-1.04476
3.89115	-0.91387	3.92026	-0.95377										-0.038	-0.012703	-0.701258	-8e-05	-0.914056	-0.0003525	-1.0449
3.90391	-0.92024	3.93362	-0.95884										-0.024	-0.0126675	-0.70132	-3.35e-05	-0.914143	-0.000302	-1.04499
3.91677	-0.92662	3.94707	-0.96392										-0.01	-0.0126495	-0.701352	-1.05e-05	-0.914185	-0.000277	-1.04504
3.92953	-0.93309	3.96042	-0.96912
3.94228	-0.93947	3.97376	-0.97425
3.95514	-0.94595	3.9872	-0.97949
3.9679	-0.95243	4.00052	-0.98475
3.98065	-0.95892	4.01384	-0.99004
3.9933	-0.9654	4.02705	-0.99534
4.00606	-0.97189	4.04035	-1.00066
4.01881	-0.97848	4.05365	-1.0061
4.03146	-0.98507	4.06684	-1.01155
4.04421	-0.99166	4.08012	-1.01703
4.05685	-0.99826	4.09329	-1.02252
4.0696	-1.00485	4.10656	-1.02804
4.08225	-1.01155	4.11972	-1.03367
4.09489	-1.01825	4.13287	-1.03931
4.10753	-1.02495	4.14601	-1.04498
4.12018	-1.03166	4.15915	-1.05066
4.13272	-1.03836	4.17218	-1.05636
4.14536	-1.04517	4.1853	-1.06218
4.15799	-1.05198	4.19841	-1.06801
4.17053	-1.05879	4.21142	-1.07387
4.18307	-1.0656	4.22442	-1.07973
4.1957	-1.07241	4.23751	-1.08562
4.20823	-1.07933	4.25049	-1.09162
4.22077	-1.08625	4.26347	-1.09763
4.2333	-1.09317	4.27644	-1.10367
4.24582	-1.10009	4.2894	-1.10972
4.25835	-1.10702	4.30236	-1.11578
4.27078	-1.11404	4.3152	-1.12196
4.2833	-1.12097	4.32814	-1.12806
4.29573	-1.128	4.34097	-1.13427
4.30825	-1.13503	4.3539	-1.14049
4.32067	-1.14217	4.36672	-1.14684
4.33309	-1.1492	4.37953	-1.15309
4.34551	-1.15634	4.39233	-1.15946
4.35793	-1.16348	4.40512	-1.16585
4.37034	-1.17062	4.41791	-1.17225
4.38275	-1.17777	4.43069	-1.17867
4.39517	-1.18501	4.44346	-1.18519
4.40748	-1.19216	4.45613	-1.19164
4.41979	-1.19941	4.46879	-1.1982
4.43219	-1.20666	4.48154	-1.20477
4.4445	-1.21392	4.49418	-1.21135
4.45681	-1.22128	4.50682	-1.21805
4.46911	-1.22853	4.51945	-1.22466
4.48141	-1.23589	4.53207	-1.23139
4.49371	-1.24326	4.54468	-1.23813
4.50591	-1.25062	4.55719	-1.24488
4.51821	-1.25809	4.56979	-1.25175
4.5304	-1.26546	4.58228	-1.25853
4.54269	-1.27293	4.59487	-1.26542
4.55489	-1.28041	4.60735	-1.27232
4.56708	-1.28788	4.61982	-1.27924
4.57927	-1.29536	4.63228	-1.28617
4.59145	-1.30294	4.64474	-1.29321
4.60364	-1.31052	4.65719	-1.30027
4.61572	-1.31811	4.66953	-1.30733
4.6279	-1.3257	4.68197	-1.31441
4.63998	-1.33329	4.69429	-1.3215
4.65216	-1.34088	4.70672	-1.3286
4.66424	-1.34857	4.71903	-1.33582
4.67631	-1.35627	4.73134	-1.34304
4.68839	-1.36397	4.74364	-1.35028
4.70046	-1.37167	4.75593	-1.35753
4.71253	-1.37937	4.76822	-1.36479
4.7245	-1.38718	4.7804	-1.37216
4.73656	-1.39499	4.79267	-1.37955
4.74852	-1.4028	4.80483	-1.38694
4.76059	-1.41061	4.81709	-1.39435
4.77255	-1.41843	4.82924	-1.40177
4.7845	-1.42635	4.84139	-1.40929
4.79646	-1.43417	4.85353	-1.41673
4.80842	-1.44209	4.86566	-1.42428
4.82037	-1.45002	4.87778	-1.43184
4.83222	-1.45794	4.8898	-1.43941
4.84417	-1.46597	4.90191	-1.44709
4.85601	-1.47391	4.91391	-1.45469
4.86796	-1.48194	4.92601	-1.46239
4.8798	-1.48998	4.938	-1.4701
4.89164	-1.49802	4.94998	-1.47782
4.90348	-1.50616	4.96195	-1.48566
4.91521	-1.51421	4.97382	-1.4934
4.92704	-1.52236	4.98578	-1.50125
4.93888	-1.53051	4.99774	-1.50911
4.95061	-1.53866	5.00959	-1.51699
4.96243	-1.54682	5.02153	-1.52487
4.97416	-1.55508	5.03336	-1.53286
4.98588	-1.56324	5.04519	-1.54076
4.9976	-1.5715	5.05701	-1.54878
5.00932	-1.57977	5.06883	-1.5568
5.02094	-1.58804	5.08054	-1.56483
5.03265	-1.59641	5.09234	-1.57297
5.04436	-1.60468	5.10413	-1.58102
5.05597	-1.61306	5.11582	-1.58917
5.06758	-1.62144	5.1275	-1.59734
5.07918	-1.62982	5.13917	-1.60552
5.09078	-1.63821	5.15084	-1.61371
5.10238	-1.6467	5.1625	-1.622
5.11398	-1.65519	5.17416	-1.63031
5.12558	-1.66358	5.1858	-1.63852
5.13707	-1.67208	5.19734	-1.64684
5.14866	-1.68068	5.20898	-1.65527
5.16014	-1.68918	5.2205	-1.66361
5.17163	-1.69769	5.23202	-1.67196
5.18311	-1.70629	5.24354	-1.68042
5.19459	-1.7149	5.25504	-1.68888
5.20607	-1.72352	5.26654	-1.69736
5.21744	-1.73213	5.27794	-1.70584
5.22891	-1.74085	5.28943	-1.71443
5.24028	-1.74958	5.3008	-1.72303
5.25175	-1.7582	5.31228	-1.73154
5.26311	-1.76693	5.32365	-1.74015
5.27447	-1.77566	5.33501	-1.74878
5.28583	-1.78449	5.34636	-1.75751
5.29709	-1.79323	5.3576	-1.76615
5.30844	-1.80207	5.36894	-1.7749
5.31979	-1.81091	5.38028	-1.78366
5.33104	-1.81976	5.3915	-1.79243
5.34228	-1.82861	5.40272	-1.8012
5.35352	-1.83756	5.41394	-1.81008
5.36476	-1.84641	5.42514	-1.81887
5.376	-1.85537	5.43634	-1.82777
5.38723	-1.86433	5.44753	-1.83667
5.39846	-1.8733	5.45872	-1.84559
5.40959	-1.88226	5.4698	-1.85451
5.42071	-1.89133	5.48087	-1.86354
5.43193	-1.90041	5.49204	-1.87258
5.44305	-1.90938	5.5031	-1.88152
5.45416	-1.91846	5.51415	-1.89057
5.46517	-1.92754	5.52509	-1.89963
5.47628	-1.93673	5.53613	-1.9088
5.48738	-1.94582	5.54716	-1.91787
5.49839	-1.95501	5.55809	-1.92705
5.50938	-1.96421	5.56901	-1.93624
5.52048	-1.9734	5.58002	-1.94544
5.53147	-1.98261	5.59092	-1.95465
5.54246	-1.99191	5.60182	-1.96396
5.55335	-2.00112	5.61261	-1.97318
5.56433	-2.01043	5.62349	-1.9825
5.57531	-2.01974	5.63437	-1.99184
5.58618	-2.02906	5.64514	-2.00118
5.59706	-2.03838	5.6559	-2.01052
5.60792	-2.0477	5.66666	-2.01988
5.61879	-2.05713	5.67741	-2.02934
5.62965	-2.06656	5.68815	-2.03881
5.64051	-2.07599	5.69888	-2.04829
5.65126	-2.08543	5.70951	-2.05777
5.66212	-2.09487	5.72023	-2.06726
5.67286	-2.10441	5.73085	-2.07686
5.68361	-2.11386	5.74145	-2.08636
5.69435	-2.1234	5.75205	-2.09597
5.70508	-2.13296	5.76265	-2.10559
5.71582	-2.14251	5.77323	-2.11521
5.72645	-2.15217	5.78371	-2.12495
5.73717	-2.16173	5.79428	-2.13458
5.74779	-2.1714	5.80475	-2.14433
5.75841	-2.18097	5.81521	-2.15398
5.76903	-2.19064	5.82566	-2.16374
5.77964	-2.20031	5.8361	-2.1735
5.79024	-2.21009	5.84654	-2.18337
5.80075	-2.21977	5.85687	-2.19315
5.81134	-2.22956	5.86729	-2.20303
5.82184	-2.23935	5.8776	-2.21292
5.83243	-2.24914	5.88801	-2.22282
5.84292	-2.25893	5.89831	-2.23272
5.8534	-2.26883	5.9086	-2.24273
5.86378	-2.27863	5.91879	-2.25265
5.87425	-2.28853	5.92907	-2.26267
5.88462	-2.29834	5.93924	-2.2726
5.89509	-2.30825	5.9495	-2.28263
5.90545	-2.31826	5.95966	-2.29277
5.91581	-2.32818	5.96981	-2.30282
5.92617	-2.3381	5.97995	-2.31287
5.93652	-2.34812	5.99009	-2.32303
5.94677	-2.35815	6.00012	-2.33319
5.95711	-2.36818	6.01024	-2.34336
5.96734	-2.37821	6.02025	-2.35354
5.97758	-2.38825	6.03026	-2.36372
5.98781	-2.39839	6.04025	-2.37401
5.99803	-2.40843	6.05024	-2.3842
6.00825	-2.41858	6.06023	-2.3945
6.01847	-2.42872	6.0702	-2.4048
6.02858	-2.43888	6.08007	-2.41511
6.03879	-2.44913	6.09003	-2.42553
6.04889	-2.45929	6.09989	-2.43585
6.05899	-2.46955	6.10973	-2.44628
6.06908	-2.47981	6.11957	-2.45671
6.07917	-2.49008	6.1294	-2.46715
6.08916	-2.50035	6.13913	-2.47759
6.09924	-2.51062	6.14894	-2.48804
6.10921	-2.521	6.15865	-2.49859
6.11918	-2.53127	6.16835	-2.50905
6.12915	-2.54166	6.17805	-2.51961
6.13912	-2.55204	6.18773	-2.53018
6.14897	-2.56243	6.19731	-2.54075
6.15893	-2.57281	6.20698	-2.55133
6.16878	-2.58321	6.21655	-2.56191
6.17872	-2.5937	6.22621	-2.5726
6.18856	-2.6042	6.23575	-2.58329
6.19839	-2.6146	6.2453	-2.59389
6.20812	-2.6251	6.25473	-2.60459
6.21795	-2.63571	6.26426	-2.61539
6.22767	-2.64621	6.27368	-2.6261
6.23749	-2.65672	6.28319	-2.63681
6.2472	-2.66734	6.29259	-2.64763
6.25691	-2.67795	6.30199	-2.65845
6.26661	-2.68857	6.31138	-2.66928
6.27631	-2.69919	6.32076	-2.68011
6.2859	-2.70981	6.33004	-2.69094
6.29559	-2.72054	6.3394	-2.70188
6.30517	-2.73116	6.34866	-2.71272
6.31475	-2.74189	6.35792	-2.72367
6.32433	-2.75262	6.36716	-2.73462
6.3339	-2.76335	6.3764	-2.74557
6.34336	-2.77409	6.38553	-2.75652
6.35292	-2.78493	6.39475	-2.76758
6.36238	-2.79567	6.40387	-2.77854
6.37183	-2.80651	6.41298	-2.78961
6.38127	-2.81735	6.42208	-2.80068
6.39072	-2.82819	6.43117	-2.81175
6.40015	-2.83904	6.44026	-2.82282
6.40958	-2.84988	6.44934	-2.8339
6.41891	-2.86083	6.45831	-2.84507
6.42824	-2.87168	6.46728	-2.85615
6.43756	-2.88263	6.47624	-2.86734
6.44687	-2.89359	6.48519	-2.87852
6.45618	-2.90454	6.49413	-2.88971
6.46549	-2.91549	6.50307	-2.9009
6.47469	-2.92645	6.5119	-2.91209
6.48398	-2.93751	6.52083	-2.92338
6.49317	-2.94856	6.52965	-2.93467
6.50236	-2.95962	6.53846	-2.94597
6.51155	-2.97068	6.54727	-2.95726
6.52063	-2.98174	6.55596	-2.96856
6.5298	-2.9928	6.56476	-2.97986
6.53887	-3.00386	6.57344	-2.99116
6.54804	-3.01502	6.58222	-3.00256
6.5571	-3.02618	6.5909	-3.01395
6.56606	-3.03734	6.59946	-3.02535
6.57511	-3.0485	6.60813	-3.03675
6.58416	-3.05966	6.61678	-3.04815
6.59311	-3.07082	6.62533	-3.05955
6.60205	-3.08208	6.63388	-3.07105
6.61109	-3.09324	6.64252	-3.08245
6.62003	-3.10449	6.65105	-3.09394
6.62886	-3.11575	6.65948	-3.10544
6.63779	-3.12701	6.668	-3.11693
6.64661	-3.13826	6.67642	-3.12842
6.65553	-3.14961	6.68493	-3.14002
6.66435	-3.16087	6.69334	-3.1515
6.67317	-3.17222	6.70174	-3.16309
6.68198	-3.18357	6.71014	-3.17468
6.69078	-3.19492	6.71853	-3.18626
6.69949	-3.20626	6.72682	-3.19784
6.70829	-3.2177	6.73521	-3.20952
6.71699	-3.22904	6.74349	-3.22109
6.72569	-3.24048	6.75177	-3.23276
6.73438	-3.25182	6.76004	-3.24432
6.74297	-3.26325	6.76822	-3.25598
6.75166	-3.27468	6.77649	-3.26764
6.76025	-3.2861	6.78465	-3.27929
6.76884	-3.29763	6.79282	-3.29103
6.77752	-3.30904	6.80108	-3.30267
6.786	-3.32056	6.80914	-3.31441
6.79458	-3.33197	6.81729	-3.32604
6.80316	-3.34347	6.82545	-3.33776
6.81164	-3.35497	6.8335	-3.34948
6.82012	-3.36647	6.84155	-3.36119
6.82859	-3.37806	6.84961	-3.37299
6.83707	-3.38955	6.85766	-3.38468
6.84554	-3.40113	6.86571	-3.39647
6.85392	-3.4126	6.87366	-3.40815
6.86239	-3.42417	6.88171	-3.41992
6.87076	-3.43573	6.88966	-3.43168
6.87914	-3.44729	6.89761	-3.44343
6.88751	-3.45894	6.90556	-3.45527
6.89588	-3.47048	6.91351	-3.46701
6.90416	-3.48212	6.92137	-3.47883
6.91253	-3.49374	6.92932	-3.49064
6.92081	-3.50526	6.93718	-3.50234
6.92909	-3.51687	6.94504	-3.51413
6.93737	-3.52857	6.95291	-3.526
6.94555	-3.54017	6.96068	-3.53776
6.95384	-3.55175	6.96855	-3.54951
6.96202	-3.56343	6.97633	-3.56135
6.97021	-3.57499	6.98411	-3.57307
6.97841	-3.58665	6.99189	-3.58488
6.9866	-3.59829	6.99968	-3.59667
6.9948	-3.60992	7.00748	-3.60844
7.0029	-3.62154	7.01518	-3.6202
7.01111	-3.63326	7.02299	-3.63205
7.01922	-3.64485	7.03071	-3.64378
7.02733	-3.65654	7.03843	-3.65559
7.03545	-3.66821	7.04617	-3.66738
7.04348	-3.67987	7.05381	-3.67915
7.05161	-3.69151	7.06155	-3.6909
7.05964	-3.70314	7.06921	-3.70263
7.06769	-3.71476	7.07688	-3.71434
7.07573	-3.72646	7.08456	-3.72613
7.08379	-3.73804	7.09225	-3.7378
7.09175	-3.74971	7.09985	-3.74954
7.09982	-3.76135	7.10756	-3.76125
7.1078	-3.77298	7.11519	-3.77295
7.11578	-3.78459	7.12283	-3.78461
7.12377	-3.79618	7.13048	-3.79625
7.13178	-3.80784	7.13815	-3.80795
7.13979	-3.81938	7.14583	-3.81953
7.14772	-3.831	7.15343	-3.83117
7.15565	-3.84259	7.16105	-3.84278
7.1636	-3.85415	7.16869	-3.85435
7.17157	-3.86568	7.17635	-3.86589
7.17955	-3.87718	7.18403	-3.87739
7.18745	-3.88864	7.19164	-3.88884
7.19548	-3.90008	7.19937	-3.90026
7.20341	-3.91157	7.20703	-3.91172
7.21139	-3.92302	7.21473	-3.92315
7.2194	-3.93442	7.22247	-3.93452
7.22734	-3.9458	7.23015	-3.94586
7.23542	-3.95712	7.23797	-3.95714
7.24344	-3.96841	7.24573	-3.96839
7.25152	-3.97963	7.25355	-3.97958
7.25967	-3.99097	7.26142	-3.99088
7.26787	-4.00214	7.2693	-4.00206
7.27606	-4.01343	7.27714	-4.01331
7.2845	-4.0247	7.28473	-4.02475

## Sheet: S prof
Spatial profiles																						Temporal profiles
s1	sim			s2	sim			s3	sim				meas	s3		s2		s1				sim	s3	s2	s1		meas	s3	s2	s1
x0	y0	x1	y1	x0	y0	x1	y1	x0	y0	x1	y1		x	y0	y1	y0	y1	y0	y1			time [ms]	Apex Displacement [mm]				time [ms]	Apex Displacement [mm]
-7.4065e-07	0	7.75e-06	-1.16999	-5.0033e-06	0	1.707e-05	-0.99605	-4.032e-06	0	1.6342e-05	-0.81037		-4									0	0	0	0		0	0	0	0
0.0144641	0	0.0135723	-1.16996	0.051789	-0.00021	0.0481966	-0.99585	0.0515696	-0.00011	0.0480452	-0.81015		-3.986									0.2	0.000111	0.00013	6e-05		0.231	0.026204	0.023612	0.034058
0.0289284	-0.0001	0.0271404	-1.16995	0.103575	-0.00066	0.0963847	-0.99502	0.103134	-0.00065	0.0960897	-0.80966		-3.972									0.5	0.000171	0.000197	0.000215		0.462	0.026067	0.023637	0.033628
0.0433645	-0.00011	0.0406875	-1.16976	0.155361	-0.00144	0.144585	-0.99365	0.1547	-0.00142	0.14415	-0.80872		-3.958									0.7	0.000162	0.000184	0.000197		0.693	0.025893	0.023437	0.032106
0.0577997	-0.00022	0.0542324	-1.1696	0.207147	-0.00256	0.192785	-0.99176	0.206266	-0.00241	0.192224	-0.80731		-3.944									0.9	0.000103	0.000111	5.3e-05		0.924	0.025325	0.023008	0.029242
0.0722409	-0.00034	0.0677824	-1.16936	0.25892	-0.0039	0.240994	-0.98927	0.25782	-0.00383	0.240307	-0.80567		-3.93									1.2	2e-05	1.4e-05	-0.000101		1.155	0.023754	0.021031	0.026951
0.0866823	-0.00046	0.0813298	-1.16906	0.310682	-0.00568	0.289198	-0.98636	0.309372	-0.00548	0.288416	-0.80357		-3.916									1.4	-7e-05	-8.6e-05	-0.000178		1.386	0.022476	0.019805	0.02573
0.101131	-0.00068	0.0948864	-1.16877	0.362441	-0.00769	0.337412	-0.98286	0.360902	-0.00746	0.336537	-0.80114		-3.902									1.6	-0.000155	-0.000172	-0.00011		1.617	0.021596	0.017705	0.02423
0.115582	-0.0008	0.108444	-1.16831	0.414178	-0.01003	0.385632	-0.97886	0.41243	-0.00976	0.384696	-0.79837		-3.888									1.8	-0.0002	-0.000205	0.0001		1.848	0.019781	0.016222	0.023435
0.130038	-0.00103	0.122008	-1.16788	0.465901	-0.01271	0.433859	-0.97439	0.463935	-0.01239	0.432874	-0.7953		-3.874									2.1	-0.000148	-0.000127	0.000273		2.079	0.018295	0.014547	0.021804
0.144495	-0.00126	0.135569	-1.16737	0.5176	-0.01571	0.482097	-0.96944	0.515427	-0.01524	0.481089	-0.7918		-3.86									2.3	1.1e-05	6.1e-05	0.000185		2.31	0.016396	0.012721	0.020128
0.158962	-0.00149	0.149139	-1.16679	0.569286	-0.01895	0.530345	-0.96394	0.566895	-0.01842	0.529346	-0.78802		-3.846									2.5	-0.001159	-0.001428	-0.00329		2.541	0.015305	0.009566	0.018402
0.173428	-0.00183	0.162711	-1.16623	0.620958	-0.02252	0.578628	-0.958	0.61835	-0.02193	0.577651	-0.78394		-3.832									2.8	-0.004424	-0.005515	-0.009724		2.772	0.013596	0.007781	0.016914
0.187916	-0.00217	0.176298	-1.1656	0.672594	-0.02641	0.626923	-0.95165	0.669771	-0.02576	0.625993	-0.7796		-3.818									3	-0.007572	-0.009313	-0.012515		3.003	0.011223	0.006377	0.014397
0.202392	-0.00251	0.18988	-1.16489	0.724206	-0.03064	0.675252	-0.94488	0.721178	-0.02982	0.674396	-0.77489		-3.804									3.2	-0.009019	-0.010787	-0.010823		3.234	0.00716	0.004086	0.010933
0.216879	-0.00286	0.203464	-1.16411	0.775802	-0.0352	0.723613	-0.93774	0.772559	-0.0342	0.722873	-0.76995		-3.79									3.5	-0.009142	-0.010597	-0.008334		3.465	0.003526	0.000481	0.007957
0.231376	-0.0032	0.21706	-1.16325	0.827363	-0.03999	0.772022	-0.93012	0.823907	-0.0389	0.771405	-0.76479		-3.776									3.7	-0.00833	-0.009415	-0.006419		3.696	0.001023	-0.003307	0.003864
0.245883	-0.00366	0.230666	-1.16242	0.878887	-0.0452	0.820473	-0.92229	0.875229	-0.04393	0.820013	-0.75943		-3.762	-0.746023	-0.767443			-0.787931	-0.777866			3.9	-0.006885	-0.007656	-0.005837		3.927	-0.001099	-0.006499	0.000324
0.26039	-0.00411	0.24427	-1.16152	0.930385	-0.05065	0.868993	-0.91402	0.926516	-0.04929	0.86869	-0.75387		-3.748	-0.742401	-0.751145	-0.81816	-0.772643	-0.851498	-0.79363			4.2	-0.005285	-0.0059	-0.007027		4.158	-0.004781	-0.009548	-0.003335
0.274908	-0.00457	0.257882	-1.16054	0.981836	-0.05642	0.917549	-0.90547	0.977777	-0.05487	0.917476	-0.74806		-3.734	-0.736668	-0.747169	-0.811617	-0.7681	-0.844561	-0.789168			4.4	-0.003991	-0.004646	-0.009217		4.389	-0.008515	-0.012215	-0.008276
0.289414	-0.00503	0.271484	-1.15948	1.03323	-0.06242	0.966171	-0.89655	1.029	-0.06077	0.966352	-0.7421		-3.72	-0.730967	-0.743182	-0.80512	-0.763603	-0.837671	-0.784764			4.6	-0.004784	-0.006002	-0.013967		4.62	-0.011644	-0.015674	-0.012768
0.303942	-0.0056	0.285104	-1.15845	1.08463	-0.06885	1.01492	-0.88752	1.0802	-0.06699	1.01532	-0.73604		-3.706	-0.725297	-0.739192	-0.798667	-0.759151	-0.830827	-0.780419			4.9	-0.008561	-0.010949	-0.019754		4.851	-0.014509	-0.021463	-0.017956
0.318469	-0.00607	0.298724	-1.15725	1.13602	-0.07551	1.06381	-0.8782	1.1313	-0.07344	1.06434	-0.7298		-3.692	-0.719656	-0.7352	-0.792258	-0.754746	-0.824026	-0.776133			5.1	-0.013021	-0.016371	-0.020482		5.082	-0.017597	-0.026353	-0.02481
0.333005	-0.00664	0.312351	-1.15608	1.1873	-0.08249	1.11272	-0.86874	1.18248	-0.08031	1.11362	-0.72361		-3.678	-0.714045	-0.731215	-0.785889	-0.75039	-0.817271	-0.771905			5.3	-0.016845	-0.020527	-0.018779		5.313	-0.02475	-0.031576	-0.0365
0.347532	-0.00731	0.325968	-1.15493	1.23857	-0.08979	1.16179	-0.85912	1.23346	-0.0874	1.16284	-0.71727		-3.664	-0.708463	-0.72724	-0.77956	-0.746084	-0.810557	-0.767738			5.5	-0.021304	-0.025304	-0.023027		5.544	-0.036867	-0.04272	-0.057071
0.362069	-0.00789	0.339593	-1.1536	1.28974	-0.09732	1.21092	-0.84934	1.28453	-0.09481	1.21232	-0.71092		-3.65	-0.70291	-0.72328	-0.773269	-0.741829	-0.803886	-0.763632			5.8	-0.029018	-0.034277	-0.039022		5.775	-0.055741	-0.064006	-0.09256
0.376595	-0.00857	0.353208	-1.15231	1.3409	-0.10528	1.26025	-0.83962	1.3355	-0.10244	1.26186	-0.70453		-3.636	-0.697383	-0.719341	-0.767015	-0.737625	-0.797256	-0.759586			6	-0.043727	-0.052109	-0.070321		6.006	-0.079454	-0.093007	-0.131486
0.391131	-0.00916	0.36683	-1.15084	1.39205	-0.11346	1.30974	-0.8298	1.38646	-0.11039	1.31159	-0.6982		-3.622	-0.691883	-0.715425	-0.760796	-0.733475	-0.790667	-0.755601			6.2	-0.067619	-0.081354	-0.114291		6.237	-0.105195	-0.123809	-0.175716
0.405657	-0.00994	0.380443	-1.1495	1.44309	-0.12196	1.35933	-0.81999	1.43731	-0.11867	1.36139	-0.69191		-3.608	-0.68641	-0.711536	-0.754612	-0.729379	-0.784118	-0.751677			6.5	-0.098601	-0.119201	-0.160789		6.468	-0.13282	-0.157302	-0.22273
0.420182	-0.01063	0.394053	-1.14799	1.49412	-0.13079	1.40914	-0.81026	1.48816	-0.12726	1.41138	-0.68576		-3.594	-0.680963	-0.707678	-0.74846	-0.725338	-0.777608	-0.747817			6.7	-0.129245	-0.156329	-0.19307		6.699	-0.158506	-0.194133	-0.271664
0.434697	-0.01133	0.407654	-1.1464	1.54514	-0.13984	1.45917	-0.80059	1.5389	-0.13617	1.46146	-0.67978		-3.58	-0.67554	-0.703854	-0.74234	-0.721352	-0.771138	-0.744018			6.9	-0.153157	-0.184787	-0.205306		6.93	-0.183281	-0.233281	-0.316697
0.4492	-0.01212	0.421243	-1.14485	1.59596	-0.1492	1.50921	-0.79111	1.58963	-0.1453	1.51173	-0.67392		-3.566	-0.670142	-0.700068	-0.736252	-0.717423	-0.764706	-0.740284			7.2	-0.169667	-0.203968	-0.209048		7.161	-0.200708	-0.269437	-0.357658
0.463704	-0.01292	0.434831	-1.14322	1.64686	-0.15889	1.55959	-0.78177	1.64035	-0.15475	1.56218	-0.6682		-3.552	-0.66477	-0.696321	-0.730193	-0.713553	-0.75831	-0.736613			7.4	-0.182068	-0.218405	-0.221532		7.392	-0.210475	-0.298148	-0.392505
0.478177	-0.01373	0.448387	-1.14153	1.69766	-0.1689	1.61009	-0.77275	1.69097	-0.16451	1.61274	-0.66278		-3.538	-0.65942	-0.692617	-0.724165	-0.70974	-0.751953	-0.733005			7.6	-0.192514	-0.23112	-0.249953		7.623	-0.213879	-0.319363	-0.410879
0.492649	-0.01463	0.461945	-1.13987	1.74835	-0.17923	1.66075	-0.76406	1.74147	-0.1745	1.66339	-0.65758		-3.524	-0.654095	-0.688959	-0.718165	-0.705987	-0.745632	-0.729464			7.9	-0.19971	-0.240424	-0.285087		7.854	-0.21931	-0.319287	-0.408193
0.50709	-0.01544	0.475472	-1.13804	1.79903	-0.18978	1.71163	-0.7557	1.79198	-0.1849	1.71422	-0.65287		-3.51	-0.648793	-0.685347	-0.712193	-0.702293	-0.739347	-0.725986			8.1	-0.205722	-0.248595	-0.320829		8.085	-0.226228	-0.313836	-0.406058
0.52152	-0.01635	0.488985	-1.13625	1.8496	-0.20065	1.76267	-0.74791	1.84247	-0.19551	1.76526	-0.64859		-3.496	-0.643514	-0.681785	-0.706248	-0.698661	-0.733099	-0.722574			8.3	-0.215152	-0.261395	-0.351633		8.316	-0.244268	-0.329846	-0.423041
0.535909	-0.01727	0.502465	-1.13439	1.90016	-0.21183	1.81394	-0.74062	1.89286	-0.20634	1.81638	-0.64466		-3.482	-0.638258	-0.678275	-0.70033	-0.695089	-0.726885	-0.719229			8.5	-0.23226	-0.284154	-0.374242		8.547	-0.262059	-0.349167	-0.441717
0.550287	-0.01818	0.515929	-1.13247	1.95062	-0.22323	1.86535	-0.73382	1.94314	-0.21758	1.86758	-0.64136		-3.468	-0.633026	-0.674817	-0.694439	-0.69158	-0.720706	-0.71595			8.8	-0.260767	-0.321296	-0.398096		8.778	-0.280844	-0.37417	-0.455595
0.564634	-0.0191	0.529364	-1.13048	2.00106	-0.23504	1.91695	-0.72768	1.99341	-0.22904	1.91893	-0.63845		-3.454	-0.627815	-0.671413	-0.688574	-0.688133	-0.714563	-0.712738			9	-0.296278	-0.36684	-0.424426		9.009	-0.305141	-0.399064	-0.490807
0.57898	-0.02013	0.5428	-1.12853	2.0514	-0.24707	1.96866	-0.72201	2.04358	-0.24082	1.97035	-0.63604		-3.44	-0.622627	-0.668066	-0.682735	-0.684749	-0.708453	-0.709593			9.2	-0.329141	-0.407812	-0.451085		9.24	-0.332153	-0.428879	-0.524734
0.593305	-0.02115	0.556214	-1.12652	2.0514	-0.24707	1.96866	-0.72201	2.04358	-0.24082	1.97035	-0.63604		-3.426	-0.617461	-0.664776	-0.676921	-0.681429	-0.702378	-0.706516			9.5	-0.355224	-0.43872	-0.485752		9.471	-0.356202	-0.455287	-0.569217
0.607619	-0.02218	0.56962	-1.12444	2.10126	-0.25933	2.02009	-0.71697	2.09327	-0.25282	2.0214	-0.634096		-3.412	-0.612317	-0.661543	-0.671132	-0.678173	-0.696336	-0.703507			9.7	-0.373258	-0.458686	-0.523083		9.702	-0.376186	-0.495259	-0.602976
0.621924	-0.02321	0.583011	-1.12229	2.15097	-0.27188	2.07156	-0.71259	2.14281	-0.26501	2.0725	-0.632678		-3.398	-0.607195	-0.65837	-0.665368	-0.674982	-0.690328	-0.700568			9.9	-0.381817	-0.4669	-0.54693		9.933	-0.393917	-0.539365	-0.654789
0.636237	-0.02435	0.596416	-1.12018	2.20057	-0.28466	2.12308	-0.708741	2.19225	-0.27752	2.12363	-0.631786		-3.384	-0.602095	-0.655256	-0.65963	-0.671855	-0.684353	-0.697697			10.2	-0.383915	-0.4684	-0.558357		10.164	-0.418017	-0.58343	-0.732977
0.65054	-0.02538	0.60981	-1.1179	2.25016	-0.29765	2.17475	-0.705403	2.24167	-0.29025	2.17487	-0.631316		-3.37	-0.597017	-0.652203	-0.653916	-0.668794	-0.678411	-0.694895			10.4	-0.386264	-0.472811	-0.573874		10.395	-0.436575	-0.616376	-0.782083
0.664843	-0.02652	0.6232	-1.11566	2.29965	-0.31105	2.22646	-0.7028	2.291	-0.30329	2.22614	-0.631386		-3.356	-0.59196	-0.649212	-0.648226	-0.665799	-0.672501	-0.692164			10.6	-0.393008	-0.485083	-0.600937		10.626	-0.444675	-0.638511	-0.791041
0.679145	-0.02767	0.636593	-1.11335	2.34903	-0.32467	2.2782	-0.700734	2.34021	-0.31655	2.2774	-0.6319		-3.342	-0.586925	-0.646281	-0.642561	-0.662871	-0.666624	-0.689503			10.9	-0.406544	-0.506227	-0.637184		10.857	-0.445379	-0.637159	-0.783287
0.693447	-0.02891	0.649987	-1.11108	2.3984	-0.33861	2.33005	-0.699333	2.38942	-0.33022	2.32876	-0.633072		-3.328	-0.581913	-0.643412	-0.63692	-0.660008	-0.66078	-0.686913			11.1	-0.429156	-0.537045	-0.677209		11.088	-0.46757	-0.6472	-0.791403
0.70779	-0.03006	0.663416	-1.10864	2.44766	-0.35277	2.3819	-0.698498	2.43852	-0.34411	2.3801	-0.634714		-3.314	-0.57692	-0.640606	-0.631304	-0.657213	-0.654967	-0.684394			11.3	-0.460701	-0.576819	-0.714536		11.319	-0.494669	-0.665801	-0.786601
0.722122	-0.03131	0.676837	-1.10623	2.49681	-0.36724	2.43375	-0.698332	2.48751	-0.35821	2.43143	-0.636829		-3.3	-0.571951	-0.637862	-0.625713	-0.654484	-0.649186	-0.681946			11.5	-0.498593	-0.623264	-0.749397		11.55	-0.51834	-0.671115	-0.799026
0.736515	-0.03257	0.690316	-1.10374	2.54585	-0.38204	2.48558	-0.698841	2.53649	-0.37263	2.48283	-0.639521		-3.286	-0.567002	-0.635182	-0.620146	-0.651823	-0.643437	-0.67957			11.8	-0.53936	-0.673218	-0.787288		11.781	-0.546876	-0.681642	-0.84585
0.750908	-0.03383	0.703799	-1.10119	2.59489	-0.39704	2.53749	-0.699929	2.58527	-0.38737	2.53409	-0.642795		-3.272	-0.562076	-0.632576	-0.614603	-0.649237	-0.637702	-0.677271			12	-0.57707	-0.719408	-0.824445		12.012	-0.573068	-0.708848	-0.867635
0.765352	-0.03519	0.717324	-1.09867	2.64381	-0.41237	2.58935	-0.7017	2.63404	-0.40232	2.5854	-0.646555		-3.258	-0.557168	-0.630034	-0.609084	-0.646718	-0.631992	-0.67505			12.2	-0.603997	-0.751577	-0.849832		12.243	-0.578605	-0.732327	-0.87614
0.779795	-0.03656	0.730853	-1.09608	2.69263	-0.42792	2.64118	-0.704053	2.68281	-0.41759	2.63677	-0.650904		-3.244	-0.552279	-0.62756	-0.603591	-0.644263	-0.626332	-0.67287			12.5	-0.619438	-0.768864	-0.869932		12.474	-0.598189	-0.761011	-0.902526
0.794259	-0.03793	0.744404	-1.09343	2.74134	-0.44388	2.69294	-0.707188	2.73136	-0.43317	2.68797	-0.655839		-3.23	-0.547414	-0.625139	-0.598127	-0.641875	-0.620707	-0.670736			12.7	-0.627235	-0.77705	-0.893553		12.705	-0.621415	-0.808126	-0.955561
0.808732	-0.0393	0.757965	-1.0907	2.79004	-0.45996	2.74475	-0.710805	2.77991	-0.44897	2.73921	-0.661266		-3.216	-0.542571	-0.622769	-0.592692	-0.639554	-0.615115	-0.668677			12.9	-0.628756	-0.778817	-0.913801		12.936	-0.64202	-0.835895	-1.00555
0.823205	-0.04067	0.771526	-1.08792	2.83852	-0.47646	2.79637	-0.715205	2.82835	-0.46499	2.79038	-0.667185		-3.202	-0.537753	-0.620451	-0.587286	-0.637301	-0.609555	-0.666693			13.2	-0.627341	-0.778634	-0.929187		13.167	-0.64972	-0.859801	-1.03634
0.837678	-0.04215	0.785087	-1.08518	2.887	-0.49318	2.84802	-0.720184	2.87668	-0.48143	2.84146	-0.673797		-3.188	-0.532956	-0.618184	-0.581909	-0.635116	-0.604027	-0.664784			13.4	-0.6288	-0.783238	-0.946302		13.398	-0.662146	-0.878549	-1.04408
0.852129	-0.04363	0.798635	-1.08238	2.93537	-0.51022	2.89958	-0.725841	2.9249	-0.49808	2.89246	-0.680898		-3.174	-0.528183	-0.615969	-0.576561	-0.632999	-0.598532	-0.66295			13.6	-0.637767	-0.797008	-0.971172		13.629	-0.671612	-0.885899	-1.03295
0.86658	-0.04511	0.812182	-1.07952	2.98363	-0.52748	2.95104	-0.73207	2.97301	-0.51495	2.94337	-0.688491		-3.16	-0.523434	-0.613803	-0.571242	-0.63095	-0.593069	-0.661193			13.9	-0.65381	-0.817928	-0.998424		13.86	-0.693254	-0.875749	-1.02188
0.880988	-0.0466	0.825693	-1.07662	3.03177	-0.54506	3.0024	-0.73898	3.02112	-0.53214	2.99428	-0.696676		-3.146	-0.518708	-0.611689	-0.565953	-0.628969	-0.587638	-0.659512			14.1	-0.674246	-0.842104	-1.01845		14.091	-0.703979	-0.869828	-1.02672
0.895386	-0.04818	0.839195	-1.07376	3.07991	-0.56295	3.05374	-0.74655	3.06901	-0.54965	3.04498	-0.70545		-3.132	-0.514005	-0.609623	-0.560693	-0.627057	-0.582238	-0.657907			14.3	-0.699814	-0.871123	-1.03387		14.322	-0.712139	-0.881954	-1.04862
0.909701	-0.04967	0.852623	-1.07076	3.12784	-0.58107	3.10486	-0.75468	3.1169	-0.56738	3.09567	-0.71471		-3.118	-0.509326	-0.607609	-0.555463	-0.625212	-0.576871	-0.656378			14.6	-0.728919	-0.904436	-1.04682		14.553	-0.737764	-0.904015	-1.07687
0.924016	-0.05127	0.866055	-1.06781	3.17565	-0.59941	3.15586	-0.76338	3.16468	-0.58542	3.14625	-0.72456		-3.104	-0.50467	-0.605644	-0.550263	-0.623436	-0.571535	-0.654927			14.8	-0.755964	-0.935936	-1.05928		14.784	-0.749219	-0.906236	-1.05385
0.93833	-0.05286	0.879489	-1.0648	3.22345	-0.61817	3.20683	-0.77283	3.21234	-0.60369	3.19671	-0.73488		-3.09	-0.500038	-0.603727	-0.545091	-0.621728	-0.56623	-0.653553			15	-0.775025	-0.957987	-1.07212		15.015	-0.750477	-0.909819	-1.0349
0.952633	-0.05446	0.892915	-1.06174	3.27104	-0.63716	3.25756	-0.78282	3.2598	-0.62228	3.24694	-0.74579		-3.076	-0.495429	-0.60186	-0.53995	-0.620088	-0.560956	-0.652256			15.2	-0.78465	-0.968191	-1.08546		15.246	-0.756085	-0.900131	-1.0295
0.967018	-0.05616	0.906423	-1.0587	3.31862	-0.65636	3.30824	-0.79336	3.30725	-0.64118	3.29714	-0.75728		-3.062	-0.490843	-0.600042	-0.534838	-0.618516	-0.555713	-0.651037			15.5	-0.787892	-0.970499	-1.10218		15.477	-0.739836	-0.906964	-1.04893
0.981402	-0.05786	0.919936	-1.0556	3.36609	-0.67589	3.35878	-0.80454	3.35458	-0.66031	3.3472	-0.76924		-3.048	-0.486281	-0.598272	-0.529756	-0.617013	-0.550502	-0.649894			15.7	-0.78518	-0.966593	-1.11665		15.708	-0.743462	-0.957119	-1.11161
0.995827	-0.05957	0.933491	-1.05244	3.41334	-0.69574	3.40907	-0.81635	3.40191	-0.67966	3.39723	-0.78166		-3.034	-0.481743	-0.596551	-0.524704	-0.615578	-0.545321	-0.648829			15.9	-0.777884	-0.958961	-1.12578		15.939	-0.774596	-0.970468	-1.14136
1.01025	-0.06128	0.947049	-1.04923	3.46058	-0.71581	3.4593	-0.82869	3.44902	-0.69932	3.44701	-0.79466		-3.02	-0.477228	-0.594878	-0.519681	-0.614211	-0.540171	-0.647842			16.2	-0.772169	-0.954513	-1.13313		16.17	-0.789657	-0.966677	-1.13052
1.02468	-0.0631	0.960614	-1.04605	3.5076	-0.7362	3.50926	-0.84164	3.49602	-0.71931	3.49665	-0.80822		-3.006	-0.472737	-0.593253	-0.514688	-0.612912	-0.535051	-0.646932			16.4	-0.771328	-0.955669	-1.13672		16.401	-0.789474	-0.945736	-1.08874
1.03908	-0.06481	0.974163	-1.04273	3.55462	-0.75682	3.55916	-0.85511	3.54291	-0.73953	3.54613	-0.82223		-2.992	-0.468269	-0.591676	-0.509725	-0.611681	-0.529961	-0.6461			16.6	-0.774084	-0.959825	-1.13629		16.632	-0.764172	-0.939499	-1.08339
1.05351	-0.06663	0.987749	-1.03948	3.60141	-0.77776	3.6088	-0.86918	3.58969	-0.76006	3.59547	-0.8368		-2.978	-0.463825	-0.590146	-0.504792	-0.610517	-0.524902	-0.645345			16.9	-0.777824	-0.963972	-1.13162		16.863	-0.755221	-0.943567	-1.08826
1.06784	-0.06845	1.00124	-1.03617	3.6482	-0.79893	3.65836	-0.88375	3.63635	-0.78082	3.64464	-0.85182		-2.964	-0.459404	-0.588665	-0.499887	-0.609421	-0.519872	-0.644667			17.1	-0.781166	-0.967007	-1.12177		17.094	-0.752835	-0.966353	-1.08271
1.08217	-0.07037	1.01474	-1.03294	3.69476	-0.82043	3.70764	-0.89891	3.6829	-0.8018	3.69366	-0.86729		-2.95	-0.455006	-0.58723	-0.495013	-0.608393	-0.514873	-0.644068			17.3	-0.782853	-0.968099	-1.10716		17.325	-0.744292	-0.950142	-1.04415
1.0965	-0.0722	1.02825	-1.02955	3.74121	-0.84224	3.75675	-0.91466	3.72924	-0.8231	3.74241	-0.88329		-2.936	-0.450632	-0.585843	-0.490168	-0.607431	-0.509903	-0.643544			17.6	-0.777613	-0.96162	-1.08349		17.556	-0.732309	-0.933213	-1.02047
1.11072	-0.07412	1.04166	-1.02624	3.78755	-0.86419	3.80568	-0.93079	3.77557	-0.84473	3.7911	-0.89984		-2.922	-0.446282	-0.584504	-0.485353	-0.606537	-0.504962	-0.643099			17.8	-0.758518	-0.939136	-1.04608		17.787	-0.708319	-0.87432	-1.01941
1.12505	-0.07605	1.05518	-1.02288	3.83377	-0.88656	3.85442	-0.94759	3.82178	-0.86659	3.83962	-0.91681		-2.908	-0.441955	-0.58321	-0.480567	-0.60571	-0.500051	-0.64273			18	-0.723356	-0.897095	-0.996743		18.018	-0.701535	-0.870727	-1.03091
1.13927	-0.07798	1.06861	-1.01949	3.87987	-0.90915	3.90298	-0.96485	3.86777	-0.88876	3.88786	-0.93432		-2.894	-0.437651	-0.581964	-0.475811	-0.604949	-0.495169	-0.642438			18.2	-0.676864	-0.84066	-0.945522		18.249	-0.678396	-0.885952	-1.04506
1.15349	-0.07992	1.08205	-1.01606	3.92585	-0.93198	3.95136	-0.98258	3.91375	-0.91117	3.93604	-0.95224		-2.88	-0.433371	-0.580764	-0.471084	-0.604255	-0.490316	-0.642223			18.5	-0.624911	-0.777219	-0.89945		18.48	-0.65441	-0.867711	-1.01534
1.16761	-0.08185	1.09539	-1.01258	3.97162	-0.95513	3.99944	-1.00086	3.95952	-0.93379	3.98395	-0.97059		-2.866	-0.429114	-0.579611	-0.466385	-0.603627	-0.485493	-0.642084			18.7	-0.57221	-0.712989	-0.858872		18.711	-0.622485	-0.817225	-0.935707
1.18183	-0.08389	1.10884	-1.00916	4.01727	-0.97861	4.04734	-1.01968	4.00516	-0.95675	4.03167	-0.98944		-2.852	-0.42488	-0.578504	-0.461717	-0.603065	-0.480697	-0.642021			18.9	-0.524118	-0.654509	-0.821528		18.942	-0.583715	-0.773955	-0.849468
1.19615	-0.08593	1.1224	-1.00568	4.0628	-1.00231	4.09504	-1.03895	4.0507	-0.98003	4.07922	-1.00881		-2.838	-0.420671	-0.577444	-0.457077	-0.602568	-0.475931	-0.642034			19.2	-0.483716	-0.605069	-0.779611		19.173	-0.568675	-0.713866	-0.79856
1.21047	-0.08798	1.13597	-1.00215	4.10821	-1.02625	4.14255	-1.05865	4.09611	-1.00354	4.1266	-1.02858		-2.824	-0.416484	-0.576429	-0.452466	-0.602137	-0.471193	-0.642122			19.4	-0.451673	-0.564894	-0.727667		19.404	-0.552286	-0.667235	-0.805131
1.2248	-0.09013	1.14955	-0.99865	4.1535	-1.05052	4.18987	-1.07888	4.14131	-1.02727	4.17369	-1.04876		-2.81	-0.41232	-0.57546	-0.447885	-0.601771	-0.466483	-0.642286			19.6	-0.426958	-0.532397	-0.664712		19.635	-0.520609	-0.628944	-0.79581
1.23912	-0.09228	1.16313	-0.99511	4.19857	-1.07501	4.23689	-1.09954	4.18649	-1.05133	4.2207	-1.06943		-2.796	-0.408179	-0.574538	-0.443332	-0.60147	-0.461802	-0.642524			19.9	-0.40653	-0.503995	-0.593972		19.866	-0.496999	-0.590673	-0.765476
1.25354	-0.09443	1.17683	-0.99153	4.24362	-1.09984	4.28382	-1.12071	4.23145	-1.07562	4.26743	-1.09049		-2.782	-0.404062	-0.573661	-0.438808	-0.601233	-0.457148	-0.642838			20.1	-0.387645	-0.477184	-0.530423		20.097	-0.47524	-0.558725	-0.709116
1.26786	-0.09659	1.19044	-0.98791	4.28844	-1.12489	4.33046	-1.14229	4.27629	-1.10024	4.31397	-1.11204		-2.768	-0.399968	-0.572829	-0.434312	-0.60106	-0.452523	-0.643225			20.3	-0.366281	-0.448338	-0.486536		20.328	-0.435154	-0.531029	-0.635673
1.28218	-0.09875	1.20406	-0.98426	4.33304	-1.15028	4.37679	-1.16438	4.32092	-1.12509	4.36024	-1.13397		-2.754	-0.395896	-0.572043	-0.429845	-0.600951	-0.447925	-0.643686			20.6	-0.3369	-0.411069	-0.457606		20.559	-0.405252	-0.497657	-0.551665
1.2965	-0.10101	1.21769	-0.98069	4.37763	-1.1759	4.42303	-1.18687	4.36552	-1.15017	4.40641	-1.15628		-2.74	-0.391849	-0.571303	-0.425406	-0.600905	-0.443354	-0.644221			20.8	-0.299279	-0.364409	-0.432154		20.79	-0.376278	-0.453065	-0.478222
1.31081	-0.10327	1.23134	-0.97712	4.42198	-1.20175	4.46898	-1.20976	4.4099	-1.17557	4.4523	-1.17907		-2.726	-0.387823	-0.570607	-0.420996	-0.600923	-0.438811	-0.644829			21	-0.258303	-0.313855	-0.397207		21.021	-0.340339	-0.42426	-0.447727
1.32503	-0.10543	1.2449	-0.97342	4.46612	-1.22794	4.51462	-1.23314	4.45416	-1.20131	4.49801	-1.20233		-2.712	-0.383821	-0.569956	-0.416614	-0.601002	-0.434296	-0.645508			21.3	-0.217614	-0.264005	-0.342028		21.252	-0.312974	-0.388706	-0.437443
1.33924	-0.1078	1.25847	-0.96988	4.51022	-1.25445	4.56017	-1.257	4.4982	-1.22718	4.54342	-1.22585		-2.698	-0.379842	-0.569352	-0.41226	-0.601145	-0.429808	-0.646261			21.5	-0.181461	-0.220392	-0.277278		21.483	-0.286299	-0.352151	-0.408646
1.35346	-0.11007	1.27206	-0.9662	4.55411	-1.28111	4.60542	-1.28115	4.54211	-1.25337	4.58865	-1.24984		-2.684	-0.375885	-0.56879	-0.407934	-0.601349	-0.425346	-0.647085			21.7	-0.154094	-0.188186	-0.224899		21.714	-0.258338	-0.304118	-0.361709
1.36777	-0.11244	1.28575	-0.96256	4.59786	-1.30809	4.65048	-1.30577	4.58591	-1.2799	4.6337	-1.27429		-2.67	-0.371951	-0.568274	-0.403635	-0.601614	-0.420912	-0.64798			21.9	-0.134549	-0.165269	-0.191009		21.945	-0.235906	-0.26696	-0.315163
1.38208	-0.11481	1.29946	-0.9589	4.64139	-1.33541	4.69523	-1.33087	4.62957	-1.30656	4.67855	-1.299		-2.656	-0.36804	-0.567802	-0.399365	-0.601941	-0.416505	-0.648946			22.2	-0.120504	-0.147752	-0.172884		22.176	-0.205571	-0.232083	-0.271299
1.3965	-0.11719	1.31329	-0.9552	4.68479	-1.36297	4.73979	-1.35633	4.67302	-1.33366	4.72312	-1.32426		-2.642	-0.364152	-0.567375	-0.395122	-0.602327	-0.412124	-0.649982			22.4	-0.110843	-0.134363	-0.164233		22.407	-0.192851	-0.204886	-0.237133
1.41081	-0.11957	1.32703	-0.95148	4.72806	-1.39076	4.78415	-1.38216	4.71634	-1.36088	4.76749	-1.34977		-2.628	-0.360287	-0.566991	-0.390906	-0.602774	-0.407769	-0.651088			22.6	-0.102277	-0.121884	-0.150582		22.638	-0.187892	-0.183082	-0.214295
1.42502	-0.12205	1.34068	-0.94785	4.77111	-1.41889	4.82821	-1.40845	4.75943	-1.38844	4.81158	-1.37572		-2.614	-0.356444	-0.566652	-0.386717	-0.603281	-0.403441	-0.652263			22.9	-0.08858	-0.103433	-0.117574		22.869	-0.181791	-0.164782	-0.186058
1.43933	-0.12453	1.35446	-0.9442	4.81392	-1.44726	4.87197	-1.4351	4.8024	-1.41623	4.85547	-1.40202		-2.6	-0.352623	-0.566356	-0.382556	-0.603847	-0.399139	-0.653506			23.1	-0.06534	-0.074297	-0.067003		23.1	-0.177101	-0.159641	-0.153991
1.45344	-0.12692	1.36805	-0.94046	4.8567	-1.47586	4.91563	-1.4621	4.84524	-1.44435	4.89918	-1.42876		-2.586	-0.348824	-0.566104	-0.378422	-0.604471	-0.394863	-0.654817			23.3	-0.037223	-0.040849	-0.025089		23.331	-0.160744	-0.155886	-0.147527
1.46764	-0.1294	1.38176	-0.9368	4.89925	-1.5048	4.959	-1.48956	4.88785	-1.47261	4.9426	-1.45573		-2.572	-0.345049	-0.565895	-0.374315	-0.605154	-0.390614	-0.656195			23.6	-0.012247	-0.012953	-0.009493		23.562	-0.137391	-0.140713	-0.151877
1.48184	-0.13199	1.39548	-0.93323	4.94157	-1.53398	5.00206	-1.51736	4.93033	-1.5013	4.98582	-1.48324		-2.558	-0.341295	-0.56573	-0.370235	-0.605894	-0.386389	-0.657641			23.8	0.005531	0.005498	-0.012313		23.793	-0.123709	-0.127171	-0.142142
1.49595	-0.13448	1.40912	-0.92955	4.98375	-1.5634	5.04493	-1.5455	4.97258	-1.53013	5.02876	-1.51097		-2.544	-0.337564	-0.565608	-0.366181	-0.606691	-0.382191	-0.659152			24	0.015536	0.015156	-0.016092		24.024	-0.11643	-0.129844	-0.115823
1.51015	-0.13707	1.42288	-0.92595	5.0257	-1.59316	5.08749	-1.57408	5.01471	-1.55929	5.07151	-1.53913		-2.53	-0.333855	-0.565528	-0.362153	-0.607544	-0.378019	-0.660728			24.3	0.018512	0.017644	-0.008995		24.255	-0.110009	-0.127151	-0.091482
1.52425	-0.13966	1.43656	-0.92233	5.06751	-1.62315	5.12986	-1.60301	5.0567	-1.58869	5.11406	-1.56762		-2.516	-0.330169	-0.565492	-0.358152	-0.608454	-0.373872	-0.66237			24.5	0.015283	0.014118	0.006784		24.486	-0.102371	-0.115697	-0.077421
1.53846	-0.14226	1.45036	-0.91866	5.10919	-1.65339	5.17203	-1.63226	5.09846	-1.61832	5.15633	-1.59643		-2.502	-0.326505	-0.565497	-0.354178	-0.609419	-0.36975	-0.664076			24.7	0.008903	0.008185	0.024169		24.717	-0.096764	-0.101006	-0.065907
1.55276	-0.14496	1.46427	-0.91506	5.15062	-1.68397	5.2139	-1.66195	5.13999	-1.64828	5.1983	-1.62566		-2.488	-0.322862	-0.565546	-0.350229	-0.610439	-0.365654	-0.665844			24.9	0.003048	0.003892	0.033615		24.948	-0.098591	-0.0829	-0.065717
1.56706	-0.14756	1.4782	-0.91134	5.19182	-1.71479	5.25547	-1.69196	5.18138	-1.67848	5.24008	-1.6552		-2.474	-0.319242	-0.565635	-0.346306	-0.611514	-0.361583	-0.667677			25.2	0.001304	0.00463	0.030795		25.179	-0.098751	-0.067085	-0.081553
1.58126	-0.15026	1.49205	-0.90771	5.23288	-1.74585	5.29684	-1.72231	5.22254	-1.70892	5.28157	-1.68506		-2.46	-0.315643	-0.565768	-0.342409	-0.612642	-0.357537	-0.66957			25.4	0.004978	0.01072	0.018446		25.41	-0.09788	-0.063776	-0.098321
1.59546	-0.15297	1.50592	-0.9041	5.2737	-1.77716	5.33791	-1.75298	5.26357	-1.73959	5.32287	-1.71523		-2.446	-0.312067	-0.565941	-0.338539	-0.613824	-0.353515	-0.671525			25.6	0.011517	0.018126	0.004251		25.641	-0.097093	-0.065594	-0.095358
1.60976	-0.15577	1.51991	-0.90057	5.31438	-1.8088	5.37878	-1.78406	5.30446	-1.7706	5.36397	-1.74581		-2.432	-0.308511	-0.566156	-0.334693	-0.615058	-0.349519	-0.673541			25.9	0.018603	0.024182	0.00285		25.872	-0.096423	-0.068614	-0.073099
1.62386	-0.15848	1.53372	-0.89697	5.35482	-1.84069	5.41934	-1.81547	5.34511	-1.80184	5.40479	-1.77669		-2.418	-0.304979	-0.566412	-0.330873	-0.616344	-0.345547	-0.675617			26.1	0.022802	0.025958	0.013568		26.103	-0.09312	-0.074248	-0.052175
1.63795	-0.16129	1.54756	-0.89348	5.39501	-1.87282	5.45961	-1.8472	5.38553	-1.83332	5.44531	-1.80788		-2.404	-0.301467	-0.566709	-0.327078	-0.617681	-0.3416	-0.677752			26.3	0.021256	0.02126	0.023101		26.334	-0.088159	-0.079866	-0.038279
1.65215	-0.1641	1.56151	-0.88995	5.43506	-1.90519	5.49967	-1.87924	5.42581	-1.86503	5.48564	-1.83936		-2.39	-0.297978	-0.567048	-0.323308	-0.61907	-0.337677	-0.679945			26.6	0.015212	0.012557	0.024065		26.565	-0.079563	-0.081594	-0.045145
1.66635	-0.16692	1.57548	-0.8864	5.47486	-1.93791	5.53944	-1.91169	5.46584	-1.89708	5.52568	-1.87125		-2.376	-0.29451	-0.567426	-0.319563	-0.620508	-0.333779	-0.682196			26.8	0.007363	0.003813	0.015715		26.796	-0.071632	-0.083954	-0.062618
1.68064	-0.16983	1.58958	-0.88294	5.51451	-1.97087	5.579	-1.94445	5.50564	-1.92926	5.56542	-1.90333		-2.362	-0.291064	-0.567844	-0.315843	-0.621996	-0.329905	-0.684504			27	0.000684	-0.001278	0.00584		27.027	-0.069045	-0.083818	-0.07867
1.69484	-0.17265	1.6036	-0.8794	5.55392	-2.00407	5.61825	-1.97752	5.5453	-1.96178	5.60498	-1.9358		-2.348	-0.287639	-0.568303	-0.312148	-0.623533	-0.326056	-0.686867			27.3	-0.002485	-0.000864	0.002501		27.258	-0.071011	-0.07314	-0.082571
1.70903	-0.17557	1.61764	-0.876	5.59308	-2.03752	5.65721	-2.01089	5.58472	-1.99453	5.64424	-1.96857		-2.334	-0.284235	-0.568801	-0.308478	-0.625118	-0.32223	-0.689287			27.5	-0.00128	0.004063	0.007019		27.489	-0.072417	-0.05795	-0.069753
1.72312	-0.17849	1.6316	-0.8726	5.63209	-2.07121	5.69596	-2.04457	5.624	-2.02752	5.68331	-2.00162		-2.32	-0.280854	-0.569338	-0.304832	-0.62675	-0.318428	-0.691761			27.7	0.002998	0.010103	0.012738		27.72	-0.071106	-0.046711	-0.052706
1.73721	-0.18141	1.64559	-0.86924	5.67084	-2.10524	5.7344	-2.07865	5.66303	-2.06084	5.72208	-2.03506		-2.306	-0.277493	-0.569914	-0.30121	-0.62843	-0.314651	-0.694287			28	0.007812	0.013753	0.012126		27.951	-0.068952	-0.040815	-0.041058
1.7513	-0.18443	1.65959	-0.86596	5.70935	-2.13952	5.77254	-2.11302	5.70182	-2.0943	5.76056	-2.06868		-2.292	-0.274154	-0.57053	-0.297613	-0.630156	-0.310897	-0.696868			28.2	0.010713	0.013043	0.004738		28.182	-0.064729	-0.039317	-0.040222
1.76539	-0.18736	1.67361	-0.8626	5.7477	-2.17404	5.81048	-2.1477	5.74047	-2.12809	5.79886	-2.10268		-2.278	-0.270836	-0.571183	-0.29404	-0.631927	-0.307167	-0.6995			28.4	0.00946	0.007109	-0.005169		28.413	-0.059452	-0.039269	-0.039585
1.77947	-0.19038	1.68766	-0.85937	5.78569	-2.20881	5.84801	-2.18266	5.77887	-2.16211	5.83685	-2.13696		-2.264	-0.267539	-0.571874	-0.29049	-0.633744	-0.30346	-0.702183			28.6	0.004153	-0.001878	-0.009795		28.644	-0.053757	-0.037461	-0.039265
1.79356	-0.19341	1.70174	-0.85612	5.82353	-2.24381	5.88533	-2.21792	5.81703	-2.19636	5.87455	-2.17151		-2.25	-0.264263	-0.572604	-0.286965	-0.635604	-0.299777	-0.704917			28.9	-0.003936	-0.011044			28.875	-0.049196	-0.035458	-0.038005
1.80775	-0.19654	1.71593	-0.85296	5.86122	-2.27906	5.92245	-2.25347	5.85504	-2.23085	5.91207	-2.20634		-2.236	-0.261009	-0.573371	-0.283463	-0.637509	-0.296118	-0.7077			29.1	-0.011263	-0.016319			29.106	-0.04582	-0.038261	-0.033569
1.82194	-0.19958	1.73015	-0.84971	5.89854	-2.31465	5.95916	-2.2894	5.8928	-2.26556	5.94929	-2.24144		-2.222	-0.257775	-0.574175	-0.279985	-0.639456	-0.292482	-0.710532			29.3	-0.014234	-0.015034			29.337	-0.043885	-0.043519	-0.029152
1.83612	-0.20271	1.74439	-0.84659	5.93571	-2.35038	5.99567	-2.32552	5.93032	-2.3005	5.98621	-2.2768		-2.208	-0.254562	-0.575015	-0.27653	-0.641444	-0.28887	-0.713411			29.6	-0.012159	-0.008686			29.568	-0.041689	-0.046844	-0.025508
1.85021	-0.20585	1.75855	-0.84351	5.97262	-2.38645	6.03186	-2.36202	5.96759	-2.33578	6.02285	-2.31253		-2.194	-0.251371	-0.575893	-0.273099	-0.643475	-0.28528	-0.716337			29.8	-0.004497	0.001724			29.799	-0.040117	-0.046032	-0.024473
1.86439	-0.20898	1.77284	-0.84044	6.00927	-2.42276	6.06775	-2.3988	6.00471	-2.37117	6.0593	-2.34842		-2.18	-0.2482	-0.576806	-0.269691	-0.645546	-0.281714	-0.719309			30	0.005904	0.012462			30.03	-0.039313	-0.040524	-0.024221
1.87837	-0.21222	1.78694	-0.83753	6.04576	-2.45931	6.10344	-2.43585	6.04158	-2.4069	6.09545	-2.38466		-2.166	-0.24505	-0.577755	-0.266306	-0.647658	-0.278172	-0.722326			30.3	0.014585	0.018904			30.261	-0.039294	-0.032564	-0.02523
1.89245	-0.21536	1.80117	-0.83455	6.08188	-2.496	6.13871	-2.47308	6.07821	-2.44275	6.13131	-2.42106		-2.152	-0.241921	-0.578739	-0.262944	-0.649808	-0.274651	-0.725388			30.5	0.019717	0.020503			30.492	-0.038352	-0.024913	-0.028099
1.90654	-0.2186	1.81542	-0.83166	6.11785	-2.53302	6.17378	-2.51067	6.11459	-2.47892	6.16689	-2.45781		-2.138	-0.238812	-0.579758	-0.259605	-0.651997	-0.271154	-0.728493			30.7	0.0205	0.018192			30.723	-0.03721	-0.021546	-0.030587
1.92072	-0.22184	1.8298	-0.82879	6.15355	-2.57027	6.20854	-2.54853	6.15081	-2.51532	6.20227	-2.49481		-2.124	-0.235725	-0.580812	-0.256289	-0.654224	-0.26768	-0.73164			31	0.017518	0.013927			30.954	-0.033169	-0.019255	-0.031323
1.9348	-0.22518	1.84409	-0.82606	6.18899	-2.60786	6.24299	-2.58675	6.18669	-2.55183	6.23727	-2.53195		-2.11	-0.232658	-0.5819	-0.252996	-0.656487	-0.26423	-0.734829			31.2	0.01175	0.00912			31.185	-0.029505	-0.018004	-0.026337
1.94888	-0.22843	1.85841	-0.82325	6.22426	-2.64558	6.27723	-2.62514	6.22242	-2.58866	6.27208	-2.56943		-2.096	-0.229612	-0.583021	-0.249725	-0.658788	-0.260801	-0.738058			31.4	0.005416	0.005543			31.416	-0.026653	-0.018836	-0.016851
1.96296	-0.23177	1.87274	-0.82061	6.25917	-2.68353	6.31107	-2.66377	6.2579	-2.62571	6.30661	-2.60715		-2.082	-0.226586	-0.584176	-0.246477	-0.661123	-0.257395	-0.741327			31.6	0.001603	0.00533			31.647	-0.025304	-0.022822	-0.00624
1.97693	-0.23512	1.887	-0.81799	6.29392	-2.7217	6.34471	-2.70266	6.29313	-2.66297	6.34085	-2.6451		-2.068	-0.223581	-0.585365	-0.243251	-0.663494	-0.254012	-0.744636			31.9	0.001183	0.007769			31.878	-0.026068	-0.029262	-0.002259
1.99091	-0.23837	1.90127	-0.81532	6.3283	-2.7601	6.37794	-2.74179	6.32822	-2.70035	6.3749	-2.68318		-2.054	-0.220595	-0.586585	-0.240047	-0.665899	-0.250652	-0.74798			32.1	0.002771	0.009883			32.109	-0.02774	-0.03421	-0.007706
2.00488	-0.24181	1.91556	-0.81288	6.36252	-2.79872	6.41096	-2.78116	6.36295	-2.73803	6.40858	-2.72158		-2.04	-0.217631	-0.587837	-0.236866	-0.668337	-0.247314	-0.751363
2.01886	-0.24516	1.92987	-0.81035	6.39648	-2.83755	6.44369	-2.82077	6.39754	-2.77592	6.44207	-2.7602		-2.026	-0.214687	-0.589121	-0.233707	-0.670807	-0.243998	-0.754781
2.03293	-0.24862	1.9443	-0.80794	6.43017	-2.87661	6.47611	-2.86061	6.43188	-2.81401	6.47529	-2.79904		-2.012	-0.211764	-0.590437	-0.23057	-0.673309	-0.240705	-0.758235
2.047	-0.25207	1.95876	-0.80552	6.4635	-2.91587	6.50814	-2.90068	6.46588	-2.8522	6.50812	-2.83798		-1.998	-0.208861	-0.591782	-0.227455	-0.675843	-0.237435	-0.761722
2.06118	-0.25553	1.97333	-0.80312	6.49667	-2.95534	6.53997	-2.94096	6.49973	-2.8907	6.54079	-2.87723		-1.984	-0.205978	-0.593159	-0.224362	-0.678407	-0.234187	-0.765243
2.06118	-0.25553	1.97333	-0.80312	6.52958	-2.99502	6.57151	-2.98146	6.53334	-2.92928	6.57319	-2.91658		-1.97	-0.203115	-0.594565	-0.22129	-0.681	-0.230961	-0.768795
2.07522	-0.25915	1.98783	-0.80095	6.56234	-3.03489	6.60286	-3.02216	6.56671	-2.96816	6.60531	-2.95622		-1.956	-0.200273	-0.596	-0.21824	-0.683621	-0.227757	-0.772379
2.0893	-0.26261	2.00234	-0.79866	6.59474	-3.07496	6.63382	-3.06305	6.59993	-3.00712	6.63727	-2.99594		-1.942	-0.19745	-0.597464	-0.215212	-0.686271	-0.224576	-0.775994
2.10327	-0.26617	2.01676	-0.79651	6.62688	-3.11512	6.6645	-3.10404	6.63282	-3.04627	6.66887	-3.03585		-1.928	-0.194649	-0.598957	-0.212205	-0.688948	-0.221417	-0.779637
2.11724	-0.26973	2.0312	-0.79438	6.65877	-3.15555	6.69491	-3.14531	6.66547	-3.08559	6.70022	-3.07593		-1.914	-0.191866	-0.600477	-0.20922	-0.691651	-0.218279	-0.783309
2.13121	-0.27339	2.04566	-0.7924	6.69042	-3.19607	6.72504	-3.18665	6.69789	-3.12509	6.7313	-3.11618		-1.9	-0.189104	-0.602025	-0.206256	-0.69438	-0.215165	-0.787008
2.14527	-0.27696	2.06023	-0.79035	6.72182	-3.23686	6.75491	-3.22825	6.73018	-3.16475	6.76225	-3.15658		-1.886	-0.186363	-0.603599	-0.203314	-0.697133	-0.212072	-0.790733
2.15924	-0.28062	2.07472	-0.78843	6.75299	-3.27771	6.78451	-3.2699	6.76214	-3.20459	6.79284	-3.19714		-1.872	-0.183642	-0.605201	-0.200392	-0.699911	-0.209001	-0.794484
2.17321	-0.28419	2.08922	-0.78645	6.78391	-3.31871	6.81387	-3.31169	6.79387	-3.24448	6.8232	-3.23774		-1.858	-0.18094	-0.606827	-0.197493	-0.702712	-0.205952	-0.79826
2.18717	-0.28796	2.10374	-0.78469	6.81461	-3.35987	6.84298	-3.35362	6.82549	-3.28462	6.85342	-3.27858		-1.844	-0.178258	-0.608479	-0.194613	-0.705535	-0.202926	-0.802059
2.20104	-0.29163	2.11817	-0.78288	6.84508	-3.40106	6.87186	-3.39556	6.85678	-3.32481	6.88332	-3.31944		-1.83	-0.175597	-0.610155	-0.191756	-0.70838	-0.199921	-0.80588
2.215	-0.2953	2.13272	-0.78109	6.87534	-3.44248	6.90051	-3.4377	6.88786	-3.36514	6.913	-3.36043		-1.816	-0.172955	-0.611856	-0.188919	-0.711245	-0.196938	-0.809723
2.22897	-0.29907	2.14728	-0.77944	6.90528	-3.48391	6.92885	-3.47983	6.91873	-3.40561	6.94247	-3.40152		-1.802	-0.170333	-0.61358	-0.186103	-0.714131	-0.193977	-0.813587
2.24293	-0.30285	2.16185	-0.777825	6.93512	-3.52547	6.95709	-3.52204	6.9494	-3.4461	6.97173	-3.4426		-1.788	-0.167731	-0.615328	-0.183308	-0.717035	-0.191038	-0.81747
2.25689	-0.30662	2.17644	-0.776242	6.96465	-3.56711	6.98503	-3.56431	6.97996	-3.48682	7.00089	-3.48388		-1.774	-0.165149	-0.617098	-0.180534	-0.719959	-0.188121	-0.821372
2.27075	-0.3105	2.19094	-0.774797	6.99411	-3.60884	7.01289	-3.60661	7.01024	-3.52755	7.02976	-3.52513		-1.76	-0.162587	-0.618891	-0.177781	-0.7229	-0.185225	-0.825292
2.28471	-0.31428	2.20555	-0.773288	7.02327	-3.65054	7.04049	-3.64884	7.04032	-3.56838	7.05846	-3.56645		-1.746	-0.160045	-0.620703	-0.175048	-0.725858	-0.182352	-0.829228
2.29857	-0.31816	2.22007	-0.771914	7.05228	-3.69231	7.06795	-3.69108	7.07011	-3.6092	7.08688	-3.60772		-1.732	-0.157523	-0.622538	-0.172337	-0.728831	-0.179501	-0.83318
2.31253	-0.32204	2.2347	-0.770575	7.08112	-3.7341	7.09526	-3.73329	7.09983	-3.65021	7.11524	-3.64912		-1.718	-0.155021	-0.624392	-0.169645	-0.731821	-0.176671	-0.837147
2.32639	-0.32592	2.24925	-0.769274	7.10981	-3.77582	7.12247	-3.77535	7.12938	-3.69119	7.14345	-3.69045		-1.704	-0.152537	-0.626267	-0.166975	-0.734824	-0.173863	-0.841128
2.34035	-0.32981	2.26391	-0.768007	7.13836	-3.81761	7.14956	-3.81743	7.15865	-3.73223	7.17141	-3.73178		-1.69	-0.150074	-0.62816	-0.164325	-0.737841	-0.171076	-0.845122
2.3542	-0.33379	2.27848	-0.766875	7.1667	-3.85929	7.1765	-3.85932	7.18788	-3.7732	7.19935	-3.77298		-1.676	-0.147631	-0.630073	-0.161697	-0.740871	-0.168312	-0.849127
2.36806	-0.33778	2.29306	-0.765781	7.19503	-3.90077	7.20348	-3.90092	7.21685	-3.81418	7.22708	-3.81415		-1.662	-0.145208	-0.632003	-0.159088	-0.743914	-0.165569	-0.853144
2.38201	-0.34177	2.30775	-0.764725	7.22319	-3.94224	7.23034	-3.94244	7.24571	-3.85516	7.25473	-3.85524		-1.648	-0.142804	-0.633949	-0.1565	-0.746967	-0.162848	-0.85717
2.39587	-0.34576	2.32235	-0.763706	7.25134	-3.9833	7.25726	-3.9835	7.27445	-3.89613	7.2823	-3.89626		-1.634	-0.14042	-0.635914	-0.153932	-0.750031	-0.160149	-0.861205
2.40972	-0.34985	2.33696	-0.762824	7.27958	-4.0242	7.28436	-4.02427	7.30311	-3.93685	7.30984	-3.93696		-1.62	-0.138056	-0.637893	-0.151385	-0.753104	-0.157472	-0.865248
2.42357	-0.35384	2.35158	-0.76188	7.3079	-4.06474	7.31147	-4.06478	7.33178	-3.9775	7.33742	-3.9776		-1.606	-0.135711	-0.639889	-0.148858	-0.756187	-0.154816	-0.869299
2.43742	-0.35794	2.3662	-0.761074	7.33672	-4.10483	7.33917	-4.10454	7.36035	-4.01788	7.36496	-4.01783		-1.592	-0.133386	-0.641899	-0.146352	-0.759278	-0.152182	-0.873356
2.45128	-0.36204	2.38084	-0.760304	7.3661	-4.14493	7.36625	-4.14497	7.38921	-4.05817	7.39271	-4.05812		-1.578	-0.131082	-0.643923	-0.143866	-0.762375	-0.14957	-0.877417
2.46513	-0.36623	2.39549	-0.759671										-1.564	-0.128797	-0.645961	-0.141401	-0.76548	-0.14698	-0.881484
2.47887	-0.37033	2.41004	-0.758976										-1.55	-0.12653	-0.648013	-0.138956	-0.76859	-0.144411	-0.885553
2.49272	-0.37453	2.4247	-0.758421										-1.536	-0.124284	-0.650076	-0.136532	-0.771704	-0.141865	-0.889624
2.50657	-0.37874	2.43937	-0.757904										-1.522	-0.122059	-0.652152	-0.134127	-0.774824	-0.139339	-0.893698
2.52032	-0.38294	2.45395	-0.757425										-1.508	-0.119852	-0.654238	-0.131744	-0.777946	-0.136836	-0.897771
2.53416	-0.38715	2.46863	-0.756984										-1.494	-0.117665	-0.656334	-0.12938	-0.781072	-0.134354	-0.901844
2.54791	-0.39145	2.48322	-0.756679										-1.48	-0.115497	-0.658442	-0.127037	-0.784199	-0.131895	-0.905915
2.56175	-0.39576	2.49792	-0.756414										-1.466	-0.113349	-0.660558	-0.124715	-0.787327	-0.129457	-0.909984
2.5755	-0.40007	2.51253	-0.756187										-1.452	-0.111222	-0.662681	-0.122412	-0.790455	-0.127041	-0.91405
2.58934	-0.40438	2.52724	-0.755997										-1.438	-0.109114	-0.664814	-0.12013	-0.793583	-0.124646	-0.918112
2.60308	-0.4087	2.54185	-0.755844										-1.424	-0.107025	-0.666954	-0.117869	-0.79671	-0.122274	-0.922169
2.61682	-0.41311	2.55648	-0.75583										-1.41	-0.104956	-0.6691	-0.115627	-0.799834	-0.119924	-0.926219
2.63056	-0.41753	2.5711	-0.755855										-1.396	-0.102908	-0.671252	-0.113406	-0.802956	-0.117595	-0.930263
2.6443	-0.42195	2.58573	-0.755918										-1.382	-0.100878	-0.67341	-0.111206	-0.806075	-0.115289	-0.934299
2.65804	-0.42637	2.60037	-0.756019										-1.368	-0.0988685	-0.675572	-0.109026	-0.809189	-0.113004	-0.938325
2.67177	-0.43089	2.61501	-0.756258										-1.354	-0.096879	-0.677739	-0.106866	-0.812298	-0.110741	-0.942344
2.68551	-0.43531	2.62965	-0.756434										-1.34	-0.094909	-0.679908	-0.104727	-0.815401	-0.1085	-0.94635
2.69925	-0.43983	2.6443	-0.756748										-1.326	-0.0929585	-0.68208	-0.102609	-0.818498	-0.106281	-0.950346
2.71298	-0.44436	2.65896	-0.7571										-1.312	-0.0910275	-0.684254	-0.100511	-0.821588	-0.104084	-0.954329
2.72671	-0.44899	2.67361	-0.75759										-1.298	-0.0891165	-0.68643	-0.098433	-0.824669	-0.101909	-0.958299
2.74035	-0.45352	2.68817	-0.758017										-1.284	-0.087225	-0.688607	-0.096376	-0.827742	-0.0997565	-0.962255
2.75408	-0.45815	2.70283	-0.758583										-1.27	-0.0853535	-0.690783	-0.0943395	-0.830805	-0.0976255	-0.966196
2.76771	-0.46278	2.7174	-0.759184										-1.256	-0.0835025	-0.692959	-0.0923235	-0.833859	-0.095517	-0.970122
2.78144	-0.46741	2.73207	-0.759822										-1.242	-0.0816705	-0.695134	-0.0903285	-0.836901	-0.0934305	-0.974031
2.79507	-0.47205	2.74664	-0.760499										-1.228	-0.0798585	-0.697306	-0.0883535	-0.839932	-0.0913655	-0.977923
2.8087	-0.47679	2.76121	-0.761313										-1.214	-0.0780665	-0.699477	-0.0863995	-0.84295	-0.0893235	-0.981795
2.82243	-0.48153	2.77588	-0.762165										-1.2	-0.076294	-0.701644	-0.0844665	-0.845956	-0.0873035	-0.985649
2.83605	-0.48627	2.79046	-0.763054										-1.186	-0.0745415	-0.703807	-0.0825535	-0.848947	-0.0853055	-0.989484
2.84968	-0.49101	2.80503	-0.763979										-1.172	-0.072809	-0.705967	-0.080662	-0.851925	-0.08333	-0.993297
2.8633	-0.49575	2.81961	-0.76494										-1.158	-0.071096	-0.70812	-0.078791	-0.854887	-0.0813765	-0.997089
2.87693	-0.5006	2.83419	-0.766037										-1.144	-0.069403	-0.710268	-0.0769405	-0.857834	-0.0794455	-1.00086
2.89055	-0.50545	2.84877	-0.767171										-1.13	-0.06773	-0.71241	-0.075111	-0.860764	-0.0775365	-1.0046
2.90417	-0.5103	2.86335	-0.76834										-1.116	-0.066077	-0.714545	-0.0733025	-0.863677	-0.0756505	-1.00833
2.91769	-0.51515	2.87783	-0.76955										-1.102	-0.064444	-0.716672	-0.071515	-0.866572	-0.0737865	-1.01202
2.93131	-0.52	2.89241	-0.77079										-1.088	-0.0628305	-0.718791	-0.0697485	-0.869449	-0.071945	-1.0157
2.94493	-0.52495	2.90699	-0.77218										-1.074	-0.0612375	-0.7209	-0.068003	-0.872307	-0.070126	-1.01934
2.95845	-0.52991	2.92147	-0.77359										-1.06	-0.0596645	-0.723001	-0.0662785	-0.875144	-0.0683295	-1.02296
2.97206	-0.53487	2.93605	-0.77504										-1.046	-0.0581115	-0.725091	-0.064575	-0.877962	-0.0665555	-1.02655
2.98558	-0.53983	2.95053	-0.77653										-1.032	-0.0565785	-0.72717	-0.0628935	-0.880759	-0.064804	-1.03011
2.99919	-0.54479	2.96511	-0.77805										-1.018	-0.0550655	-0.729238	-0.061232	-0.883534	-0.0630755	-1.03365
3.01271	-0.54985	2.97959	-0.77971										-1.004	-0.053572	-0.731294	-0.0595925	-0.886286	-0.061369	-1.03715
3.02622	-0.55492	2.99406	-0.7814										-0.99	-0.0520995	-0.733338	-0.057974	-0.889016	-0.0596855	-1.04062
3.03973	-0.55998	3.00854	-0.78313										-0.976	-0.050647	-0.735368	-0.0563765	-0.891722	-0.0580245	-1.04406
3.05324	-0.56505	3.02301	-0.78489										-0.962	-0.049214	-0.737384	-0.054801	-0.894404	-0.0563865	-1.04747
3.06675	-0.57022	3.03748	-0.78679										-0.948	-0.0478015	-0.739386	-0.0532465	-0.897061	-0.054771	-1.05085
3.08026	-0.57539	3.05195	-0.78872										-0.934	-0.0464095	-0.741373	-0.051714	-0.899693	-0.053179	-1.05419
3.09377	-0.58057	3.06642	-0.79069										-0.92	-0.045037	-0.743344	-0.0502025	-0.902299	-0.051609	-1.05749
3.10727	-0.58574	3.08088	-0.79269										-0.906	-0.043685	-0.7453	-0.0487125	-0.904879	-0.0500625	-1.06077
3.12068	-0.59092	3.09524	-0.79472										-0.892	-0.0423535	-0.747237	-0.0472445	-0.907432	-0.0485385	-1.064
3.13418	-0.5961	3.10971	-0.79679										-0.878	-0.041042	-0.749158	-0.0457975	-0.909957	-0.0470375	-1.0672
3.14769	-0.60138	3.12416	-0.79899										-0.864	-0.0397505	-0.751062	-0.044373	-0.912453	-0.0455595	-1.07037
3.16109	-0.60666	3.13852	-0.80123										-0.85	-0.0384795	-0.752946	-0.0429695	-0.914921	-0.044104	-1.07349
3.17459	-0.61195	3.15297	-0.8035										-0.836	-0.0372295	-0.754812	-0.041589	-0.91736	-0.042672	-1.07658
3.18799	-0.61733	3.16732	-0.8059										-0.822	-0.0359995	-0.756658	-0.0402295	-0.919769	-0.0412635	-1.07963
3.20138	-0.62262	3.18166	-0.80824										-0.808	-0.034789	-0.758483	-0.0388915	-0.922148	-0.0398775	-1.08264
3.21478	-0.62801	3.196	-0.8107										-0.794	-0.0335995	-0.760289	-0.037576	-0.924496	-0.038515	-1.08561
3.22818	-0.6334	3.21034	-0.8132										-0.78	-0.0324305	-0.762073	-0.0362825	-0.926812	-0.0371755	-1.08854
3.24157	-0.6388	3.22467	-0.81574										-0.766	-0.031282	-0.763836	-0.035011	-0.929097	-0.035859	-1.09142
3.25497	-0.64419	3.239	-0.8183										-0.752	-0.030154	-0.765575	-0.0337615	-0.931349	-0.0345665	-1.09427
3.26836	-0.64969	3.25333	-0.821										-0.738	-0.029046	-0.767293	-0.0325345	-0.933569	-0.0332965	-1.09707
3.28175	-0.65519	3.26765	-0.82373										-0.724	-0.0279585	-0.768987	-0.0313285	-0.935754	-0.03205	-1.09983
3.29514	-0.66069	3.28197	-0.82649										-0.71	-0.026892	-0.770657	-0.030146	-0.937906	-0.030827	-1.10255
3.30843	-0.66619	3.29618	-0.82928										-0.696	-0.0258455	-0.772304	-0.0289855	-0.940024	-0.0296275	-1.10522
3.32182	-0.6717	3.31049	-0.8321										-0.682	-0.02482	-0.773925	-0.027847	-0.942108	-0.028451	-1.10785
3.33511	-0.67731	3.32469	-0.83506										-0.668	-0.023815	-0.775522	-0.026731	-0.944156	-0.027298	-1.11043
3.34849	-0.68292	3.33899	-0.83804										-0.654	-0.0228305	-0.777092	-0.025638	-0.946168	-0.026169	-1.11297
3.36178	-0.68853	3.35318	-0.84106										-0.64	-0.0218665	-0.778637	-0.0245665	-0.948144	-0.025063	-1.11546
3.37506	-0.69414	3.36737	-0.8441										-0.626	-0.020923	-0.780155	-0.0235185	-0.950084	-0.0239805	-1.1179
3.38834	-0.69986	3.38156	-0.84728										-0.612	-0.0200005	-0.781646	-0.022492	-0.951987	-0.0229215	-1.1203
3.40162	-0.70547	3.39573	-0.85038										-0.598	-0.0190985	-0.78311	-0.021489	-0.953852	-0.0218865	-1.12265
3.4149	-0.71119	3.40991	-0.85362										-0.584	-0.018217	-0.784545	-0.0205085	-0.95568	-0.020875	-1.12495
3.42818	-0.71691	3.42408	-0.85688										-0.57	-0.0173565	-0.785953	-0.0195505	-0.957469	-0.019887	-1.1272
3.44145	-0.72264	3.43824	-0.86018										-0.556	-0.0165165	-0.787331	-0.018615	-0.95922	-0.018923	-1.12941
3.45473	-0.72846	3.4524	-0.8636										-0.542	-0.0156975	-0.788681	-0.0177025	-0.960933	-0.0179825	-1.13156
3.468	-0.73419	3.46655	-0.86695										-0.528	-0.014899	-0.79	-0.016813	-0.962606	-0.017066	-1.13366
3.48118	-0.74002	3.48059	-0.87044										-0.514	-0.014121	-0.791291	-0.0159465	-0.964239	-0.016173	-1.13572
3.49445	-0.74585	3.49473	-0.87395										-0.5	-0.0133645	-0.79255	-0.0151025	-0.965833	-0.0153035	-1.13772
3.50762	-0.75168	3.50876	-0.87749										-0.486	-0.0126285	-0.79378	-0.0142815	-0.967386	-0.0144585	-1.13967
3.52079	-0.75762	3.52279	-0.88115										-0.472	-0.011913	-0.794978	-0.013484	-0.968898	-0.013637	-1.14158
3.53405	-0.76355	3.53691	-0.88485										-0.458	-0.011219	-0.796145	-0.012709	-0.97037	-0.012839	-1.14342
3.54722	-0.76939	3.55093	-0.88847										-0.444	-0.0105455	-0.79728	-0.011957	-0.9718	-0.0120655	-1.14522
3.56038	-0.77533	3.56494	-0.89222										-0.43	-0.009893	-0.798383	-0.011228	-0.973188	-0.0113155	-1.14696
3.57355	-0.78138	3.57894	-0.8961										-0.416	-0.0092615	-0.799454	-0.010523	-0.974535	-0.01059	-1.14866
3.58671	-0.78732	3.59293	-0.8999										-0.402	-0.0086505	-0.800491	-0.0098405	-0.97584	-0.009888	-1.15029
3.59987	-0.79337	3.60692	-0.90383										-0.388	-0.0080605	-0.801497	-0.009181	-0.977102	-0.00921	-1.15188
3.61303	-0.79942	3.62091	-0.90779										-0.374	-0.0074915	-0.802469	-0.008545	-0.978322	-0.008556	-1.15341
3.62609	-0.80547	3.63478	-0.91178										-0.36	-0.0069435	-0.803407	-0.007932	-0.979499	-0.007926	-1.15489
3.63924	-0.81153	3.64875	-0.91579										-0.346	-0.0064165	-0.804311	-0.007343	-0.980632	-0.0073205	-1.15631
3.6523	-0.81768	3.66262	-0.91993										-0.332	-0.0059105	-0.805182	-0.006777	-0.981722	-0.0067385	-1.15768
3.66545	-0.82374	3.67657	-0.92399										-0.318	-0.0054255	-0.806018	-0.006234	-0.982768	-0.006181	-1.15899
3.6785	-0.8299	3.69042	-0.92818										-0.304	-0.0049615	-0.80682	-0.005715	-0.98377	-0.0056475	-1.16025
3.69155	-0.83606	3.70426	-0.93239										-0.29	-0.0045185	-0.807586	-0.005219	-0.984729	-0.0051385	-1.16145
3.7046	-0.84223	3.7181	-0.93663										-0.276	-0.0040965	-0.808318	-0.0047465	-0.985643	-0.0046525	-1.16259
3.71765	-0.8485	3.73192	-0.941										-0.262	-0.0036955	-0.809014	-0.0042975	-0.986512	-0.004192	-1.16368
3.7307	-0.85466	3.74575	-0.94529										-0.248	-0.0033155	-0.809675	-0.0038725	-0.987337	-0.0037545	-1.16472
3.74374	-0.86094	3.75956	-0.9497										-0.234	-0.0029565	-0.8103	-0.00347	-0.988117	-0.0033425	-1.1657
3.75679	-0.86721	3.77337	-0.95414										-0.22	-0.0026185	-0.81089	-0.0030915	-0.988852	-0.0029535	-1.16662
3.76973	-0.87359	3.78707	-0.95871										-0.206	-0.0023015	-0.811443	-0.002737	-0.989542	-0.002589	-1.16748
3.78277	-0.87986	3.80086	-0.96319										-0.192	-0.002006	-0.81196	-0.0024055	-0.990186	-0.002249	-1.16829
3.7958	-0.88624	3.81464	-0.96781										-0.178	-0.0017315	-0.812441	-0.002098	-0.990785	-0.0019335	-1.16904
3.80874	-0.89263	3.82832	-0.97244										-0.164	-0.001478	-0.812886	-0.0018135	-0.991338	-0.0016415	-1.16973
3.82168	-0.89901	3.84199	-0.9771										-0.15	-0.001246	-0.813294	-0.0015535	-0.991846	-0.0013745	-1.17037
3.83471	-0.9054	3.85575	-0.98178										-0.136	-0.0010345	-0.813665	-0.001316	-0.992308	-0.0011315	-1.17095
3.84764	-0.91179	3.86941	-0.98649										-0.122	-0.000844	-0.813999	-0.0011035	-0.992724	-0.000913	-1.17147
3.86057	-0.91828	3.88305	-0.99132										-0.108	-0.0006755	-0.814297	-0.0009135	-0.993093	-0.000718	-1.17193
3.8735	-0.92477	3.89669	-0.99617										-0.094	-0.000527	-0.814558	-0.0007475	-0.993417	-0.0005485	-1.17234
3.88643	-0.93127	3.91033	-1.00104										-0.08	-0.0004	-0.814781	-0.000606	-0.993695	-0.000402	-1.17268
3.89935	-0.93777	3.92395	-1.00594										-0.066	-0.0002945	-0.814967	-0.000487	-0.993927	-0.0002805	-1.17297
3.91218	-0.94437	3.93747	-1.01096										-0.052	-0.0002105	-0.815116	-0.000392	-0.994112	-0.0001835	-1.17321
3.9251	-0.95087	3.95108	-1.0159										-0.038	-0.0001465	-0.815228	-0.000321	-0.994251	-0.0001105	-1.17338
3.93792	-0.95748	3.96458	-1.02096										-0.024	-0.0001045	-0.815303	-0.000274	-0.994343	-6.2e-05	-1.1735
3.95084	-0.96408	3.97817	-1.02605										-0.01	-8.35e-05	-0.81534	-0.00025	-0.99439	-3.75e-05	-1.17356
3.96366	-0.97079	3.99166	-1.03126
3.97647	-0.97741	4.00514	-1.03638
3.98939	-0.98412	4.01871	-1.04163
4.0022	-0.99084	4.03217	-1.0469
4.01501	-0.99756	4.04563	-1.05219
4.02772	-1.00428	4.05898	-1.0575
4.04052	-1.011	4.07241	-1.06284
4.05333	-1.01783	4.08585	-1.06829
4.06603	-1.02466	4.09917	-1.07376
4.07883	-1.03149	4.11259	-1.07925
4.09153	-1.03833	4.12589	-1.08477
4.10433	-1.04516	4.13929	-1.0903
4.11703	-1.0521	4.15258	-1.09595
4.12972	-1.05904	4.16587	-1.10162
4.14241	-1.06599	4.17914	-1.10731
4.1551	-1.07293	4.19241	-1.11302
4.16769	-1.07988	4.20557	-1.11875
4.18038	-1.08693	4.21882	-1.1246
4.19306	-1.09399	4.23207	-1.13046
4.20564	-1.10104	4.2452	-1.13635
4.21822	-1.1081	4.25833	-1.14225
4.2309	-1.11516	4.27155	-1.14817
4.24348	-1.12233	4.28466	-1.15421
4.25605	-1.1295	4.29776	-1.16027
4.26863	-1.13666	4.31086	-1.16634
4.2812	-1.14384	4.32395	-1.17243
4.29377	-1.15101	4.33703	-1.17854
4.30623	-1.15829	4.35	-1.18477
4.3188	-1.16547	4.36306	-1.19091
4.33126	-1.17275	4.37602	-1.19717
4.34382	-1.18004	4.38906	-1.20345
4.35628	-1.18742	4.402	-1.20984
4.36873	-1.19471	4.41493	-1.21615
4.38119	-1.20211	4.42786	-1.22258
4.39364	-1.2095	4.44077	-1.22903
4.40609	-1.2169	4.45368	-1.23549
4.41853	-1.2243	4.46658	-1.24196
4.43098	-1.23181	4.47947	-1.24855
4.44332	-1.23921	4.49225	-1.25506
4.45566	-1.24672	4.50503	-1.26168
4.4681	-1.25423	4.51789	-1.26832
4.48044	-1.26175	4.53065	-1.27498
4.49277	-1.26937	4.5434	-1.28175
4.5051	-1.27689	4.55614	-1.28843
4.51743	-1.28451	4.56888	-1.29523
4.52976	-1.29213	4.5816	-1.30205
4.54198	-1.29976	4.59422	-1.30888
4.5543	-1.30749	4.60693	-1.31583
4.56652	-1.31513	4.61954	-1.32268
4.57884	-1.32287	4.63223	-1.32966
4.59106	-1.33061	4.64482	-1.33665
4.60327	-1.33835	4.65739	-1.34365
4.61548	-1.3461	4.66996	-1.35067
4.62769	-1.35394	4.68253	-1.3578
4.63989	-1.3618	4.69508	-1.36495
4.65199	-1.36965	4.70753	-1.3721
4.66419	-1.37751	4.72006	-1.37928
4.67629	-1.38537	4.73249	-1.38647
4.68848	-1.39323	4.74502	-1.39367
4.70058	-1.4012	4.75743	-1.40098
4.71267	-1.40917	4.76984	-1.40831
4.72475	-1.41714	4.78223	-1.41565
4.73684	-1.42512	4.79462	-1.423
4.74892	-1.4331	4.80701	-1.43037
4.7609	-1.44118	4.81928	-1.43785
4.77298	-1.44926	4.83164	-1.44535
4.78495	-1.45735	4.8439	-1.45285
4.79702	-1.46544	4.85625	-1.46037
4.80899	-1.47353	4.86849	-1.46791
4.82095	-1.48173	4.88073	-1.47555
4.83292	-1.48983	4.89295	-1.48311
4.84488	-1.49803	4.90517	-1.49078
4.85683	-1.50624	4.91738	-1.49846
4.86869	-1.51445	4.92948	-1.50616
4.88064	-1.52276	4.94168	-1.51396
4.89249	-1.53098	4.95376	-1.52168
4.90443	-1.5393	4.96594	-1.52952
4.91627	-1.54762	4.97801	-1.53736
4.92811	-1.55594	4.99007	-1.54522
4.93995	-1.56437	5.00213	-1.55318
4.95168	-1.57271	5.01407	-1.56106
4.96351	-1.58114	5.02611	-1.56905
4.97534	-1.58958	5.03814	-1.57706
4.98707	-1.59802	5.05006	-1.58507
4.99889	-1.60646	5.06207	-1.5931
5.01061	-1.61501	5.07398	-1.60124
5.02232	-1.62346	5.08588	-1.60928
5.03403	-1.63202	5.09777	-1.61745
5.04574	-1.64058	5.10965	-1.62562
5.05735	-1.64914	5.12142	-1.6338
5.06905	-1.6578	5.13329	-1.64209
5.08075	-1.66637	5.14514	-1.6503
5.09235	-1.67504	5.15689	-1.65862
5.10394	-1.68372	5.16863	-1.66694
5.11553	-1.6924	5.18037	-1.67528
5.12711	-1.70108	5.19209	-1.68363
5.1387	-1.70986	5.20381	-1.69209
5.15027	-1.71865	5.21552	-1.70057
5.16185	-1.72735	5.22722	-1.70895
5.17332	-1.73614	5.23881	-1.71744
5.18489	-1.74504	5.2505	-1.72604
5.19636	-1.75384	5.26207	-1.73456
5.20782	-1.76265	5.27364	-1.74308
5.21928	-1.77156	5.2852	-1.75172
5.23073	-1.78047	5.29675	-1.76036
5.24218	-1.78939	5.3083	-1.76902
5.25353	-1.79831	5.31973	-1.77768
5.26497	-1.80733	5.33126	-1.78646
5.27631	-1.81636	5.34268	-1.79525
5.28775	-1.82529	5.35419	-1.80394
5.29908	-1.83433	5.36559	-1.81275
5.31041	-1.84336	5.37698	-1.82157
5.32174	-1.85251	5.38837	-1.8305
5.33296	-1.86155	5.39965	-1.83934
5.34428	-1.8707	5.41101	-1.84828
5.35559	-1.87986	5.42238	-1.85724
5.3668	-1.88901	5.43363	-1.86621
5.37801	-1.89817	5.44487	-1.87518
5.38921	-1.90744	5.45611	-1.88427
5.40041	-1.91661	5.46733	-1.89327
5.4116	-1.92588	5.47855	-1.90237
5.42279	-1.93515	5.48976	-1.91149
5.43397	-1.94443	5.50096	-1.92062
5.44506	-1.95372	5.51206	-1.92975
5.45613	-1.9631	5.52314	-1.939
5.46731	-1.97249	5.53432	-1.94825
5.47838	-1.98179	5.54539	-1.95742
5.48944	-1.99119	5.55644	-1.96669
5.5004	-2.00059	5.56739	-1.97598
5.51146	-2.01009	5.57844	-1.98537
5.52251	-2.0195	5.58947	-1.99467
5.53346	-2.02902	5.60039	-2.00408
5.5444	-2.03854	5.61131	-2.0135
5.55544	-2.04806	5.62232	-2.02293
5.56638	-2.05758	5.63322	-2.03237
5.57731	-2.06721	5.6441	-2.04192
5.58813	-2.07675	5.65489	-2.05138
5.59905	-2.08638	5.66576	-2.06095
5.60997	-2.09602	5.67662	-2.07052
5.62078	-2.10567	5.68737	-2.08011
5.63159	-2.11532	5.69812	-2.0897
5.64239	-2.12497	5.70886	-2.0993
5.65319	-2.13473	5.71958	-2.10902
5.66399	-2.14449	5.7303	-2.11874
5.67478	-2.15425	5.74101	-2.12847
5.68546	-2.16402	5.75161	-2.13821
5.69624	-2.1738	5.7623	-2.14796
5.70691	-2.18367	5.77289	-2.15781
5.71758	-2.19345	5.78346	-2.16758
5.72825	-2.20334	5.79402	-2.17745
5.73891	-2.21323	5.80458	-2.18733
5.74956	-2.22312	5.81513	-2.19722
5.76011	-2.23312	5.82556	-2.20722
5.77076	-2.24302	5.83609	-2.21713
5.7813	-2.25302	5.84651	-2.22715
5.79183	-2.26293	5.85692	-2.23707
5.80236	-2.27294	5.86732	-2.24711
5.81289	-2.28296	5.87771	-2.25715
5.82341	-2.29308	5.88809	-2.2673
5.83382	-2.30311	5.89836	-2.27736
5.84433	-2.31324	5.90872	-2.28753
5.85473	-2.32337	5.91898	-2.2977
5.86523	-2.33351	5.92932	-2.30789
5.87562	-2.34365	5.93955	-2.31808
5.88601	-2.3539	5.94978	-2.32838
5.89629	-2.36405	5.95989	-2.33859
5.90667	-2.3743	5.9701	-2.34891
5.91694	-2.38446	5.98019	-2.35913
5.9273	-2.39472	5.99038	-2.36946
5.93756	-2.40508	6.00046	-2.3799
5.94782	-2.41535	6.01052	-2.39025
5.95807	-2.42563	6.02058	-2.40061
5.96831	-2.43601	6.03063	-2.41107
5.97845	-2.44639	6.04057	-2.42154
5.98868	-2.45677	6.05059	-2.43202
5.99881	-2.46716	6.06051	-2.44251
6.00893	-2.47756	6.07042	-2.45301
6.01904	-2.48805	6.08032	-2.46361
6.02915	-2.49846	6.0902	-2.47412
6.03925	-2.50896	6.10008	-2.48474
6.04935	-2.51947	6.10995	-2.49537
6.05934	-2.52999	6.11971	-2.506
6.06942	-2.54061	6.12955	-2.51674
6.0794	-2.55113	6.13929	-2.52739
6.08937	-2.56176	6.14902	-2.53815
6.09934	-2.57239	6.15874	-2.54891
6.1093	-2.58302	6.16844	-2.55968
6.11916	-2.59365	6.17804	-2.57046
6.12911	-2.6043	6.18773	-2.58124
6.13895	-2.61504	6.19731	-2.59213
6.14878	-2.62569	6.20687	-2.60293
6.15861	-2.63644	6.21643	-2.61383
6.16844	-2.6472	6.22598	-2.62474
6.17816	-2.65795	6.23541	-2.63566
6.18797	-2.66872	6.24494	-2.64658
6.19767	-2.67948	6.25435	-2.65751
6.20747	-2.69035	6.26386	-2.66855
6.21716	-2.70123	6.27325	-2.6796
6.22685	-2.712	6.28264	-2.69055
6.23643	-2.72288	6.29191	-2.7016
6.2461	-2.73387	6.30128	-2.71277
6.25567	-2.74476	6.31053	-2.72383
6.26533	-2.75565	6.31988	-2.73491
6.27488	-2.76664	6.32911	-2.74609
6.28443	-2.77764	6.33833	-2.75728
6.29397	-2.78864	6.34754	-2.76847
6.30351	-2.79964	6.35674	-2.77967
6.31294	-2.81065	6.36584	-2.79087
6.32246	-2.82176	6.37502	-2.80218
6.33187	-2.83277	6.38409	-2.8134
6.34128	-2.84389	6.39315	-2.82472
6.35068	-2.85501	6.4022	-2.83604
6.36008	-2.86613	6.41124	-2.84737
6.36937	-2.87726	6.42016	-2.85871
6.37875	-2.88848	6.42918	-2.87015
6.38802	-2.89962	6.43809	-2.8815
6.39729	-2.91085	6.44699	-2.89294
6.40656	-2.92208	6.45587	-2.9044
6.41581	-2.93332	6.46475	-2.91586
6.42506	-2.94456	6.47362	-2.92732
6.43431	-2.9558	6.48247	-2.93879
6.44344	-2.96715	6.49122	-2.95036
6.45257	-2.9784	6.49996	-2.96184
6.46169	-2.98975	6.50868	-2.97342
6.47081	-3.0011	6.5174	-2.985
6.47992	-3.01245	6.5261	-2.99658
6.48903	-3.0238	6.5348	-3.00817
6.49802	-3.03516	6.54338	-3.01977
6.50712	-3.04662	6.55206	-3.03146
6.5161	-3.05808	6.56062	-3.04316
6.52508	-3.06954	6.56918	-3.05486
6.53405	-3.081	6.57773	-3.06656
6.54292	-3.09246	6.58616	-3.07827
6.55188	-3.10392	6.59469	-3.08998
6.56073	-3.11539	6.60311	-3.10169
6.56968	-3.12695	6.61162	-3.1135
6.57852	-3.13852	6.62001	-3.12531
6.58725	-3.15009	6.6283	-3.13712
6.59608	-3.16165	6.63668	-3.14894
6.60491	-3.17322	6.64505	-3.16075
6.61362	-3.18479	6.65332	-3.17257
6.62234	-3.19645	6.66157	-3.18449
6.63114	-3.20802	6.66991	-3.1963
6.63984	-3.21969	6.67815	-3.20822
6.64844	-3.23135	6.68628	-3.22014
6.65713	-3.24302	6.6945	-3.23205
6.66571	-3.25468	6.70261	-3.24397
6.67439	-3.26644	6.71081	-3.25598
6.68296	-3.27811	6.71891	-3.26789
6.69153	-3.28987	6.72699	-3.2799
6.70009	-3.30163	6.73507	-3.29191
6.70865	-3.31338	6.74314	-3.30392
6.7171	-3.32514	6.75111	-3.31593
6.72565	-3.33699	6.75916	-3.32803
6.73409	-3.34874	6.76711	-3.34003
6.74253	-3.36059	6.77506	-3.35212
6.75097	-3.37233	6.783	-3.36411
6.7593	-3.38417	6.79083	-3.3762
6.76773	-3.39601	6.79876	-3.38828
6.77605	-3.40784	6.80658	-3.40036
6.78437	-3.41977	6.81439	-3.41253
6.79279	-3.43159	6.82231	-3.42459
6.801	-3.44351	6.83001	-3.43675
6.80931	-3.45532	6.83781	-3.4488
6.81762	-3.46723	6.84561	-3.46095
6.82583	-3.47913	6.85331	-3.47309
6.83403	-3.49103	6.861	-3.48522
6.84223	-3.50302	6.86869	-3.49744
6.85043	-3.5149	6.87637	-3.50955
6.85862	-3.52688	6.88405	-3.52175
6.86672	-3.53875	6.89163	-3.53385
6.87491	-3.55071	6.89931	-3.54603
6.883	-3.56267	6.90689	-3.55821
6.89109	-3.57462	6.91446	-3.57037
6.89918	-3.58665	6.92204	-3.58262
6.90727	-3.59858	6.92961	-3.59476
6.91526	-3.6106	6.93708	-3.60699
6.92335	-3.62261	6.94466	-3.6192
6.93134	-3.63451	6.95214	-3.6313
6.93933	-3.6465	6.95962	-3.64348
6.94733	-3.65858	6.9671	-3.65575
6.95523	-3.67054	6.97448	-3.6679
6.96322	-3.68249	6.98197	-3.68004
6.97112	-3.69453	6.98936	-3.69226
6.97902	-3.70646	6.99676	-3.70436
6.98693	-3.71847	7.00416	-3.71654
6.99484	-3.73047	7.01156	-3.72871
7.00275	-3.74246	7.01898	-3.74085
7.01057	-3.75442	7.02629	-3.75298
7.01849	-3.76648	7.03372	-3.76518
7.02631	-3.77842	7.04105	-3.77726
7.03414	-3.79043	7.04839	-3.78942
7.04198	-3.80244	7.05574	-3.80155
7.04972	-3.81442	7.063	-3.81366
7.05757	-3.82638	7.07037	-3.82574
7.06533	-3.83832	7.07765	-3.83779
7.07309	-3.85024	7.08495	-3.84982
7.08086	-3.86224	7.09225	-3.86191
7.08865	-3.87412	7.09957	-3.87388
7.09633	-3.88607	7.1068	-3.88592
7.10413	-3.89799	7.11415	-3.89792
7.11184	-3.90989	7.12141	-3.90988
7.11956	-3.92176	7.12868	-3.92181
7.12729	-3.9336	7.13598	-3.9337
7.13503	-3.9455	7.14329	-3.94565
7.14279	-3.95727	7.15063	-3.95746
7.15046	-3.96911	7.15789	-3.96932
7.15815	-3.9809	7.16517	-3.98114
7.16586	-3.99266	7.17247	-3.9929
7.17359	-4.00437	7.1798	-4.00461
7.18134	-4.01603	7.18717	-4.01627
7.18902	-4.02764	7.19447	-4.02786
7.19683	-4.03921	7.2019	-4.03941
7.20456	-4.05081	7.20927	-4.05098
7.21234	-4.06236	7.2167	-4.06249
7.22016	-4.07383	7.22417	-4.07392
7.22794	-4.08527	7.2316	-4.08531
7.23587	-4.09662	7.23919	-4.0966
7.24377	-4.10792	7.24674	-4.10786
7.25175	-4.11911	7.25436	-4.11902
7.25983	-4.13043	7.26208	-4.1303
7.26798	-4.14156	7.26978	-4.14146
7.27615	-4.1528	7.27748	-4.15263
7.28456	-4.16406	7.28477	-4.1641

## Sheet: P prof
Spatial profiles																Temporal profiles
sim	p1				p2				meas	p1		p2				sim	p1	p2		meas	p1	p2
x0	y0	x1	y1	x0	y0	x1	y1		x	y0	y1	y0	y1			time [ms]	Apex Displacement [mm]			time [ms]	Apex Displacement [mm]
-2.9518e-05	0	8.9941e-05	-0.76854	-2.4335e-05	0	9.5744e-05	-0.72676		-4	-0.997748		-1.02843				0	0	0		0	0	0
0.0516597	-0.00076	0.0481169	-0.76917	0.0514696	-0.00087	0.0482409	-0.72752		-3.986	-0.989418		-1.02001				0.2	0.00014	0.00012		0.231	-9.8e-05	-0.000134
0.103363	-0.00193	0.0961553	-0.76954	0.102976	-0.00204	0.096372	-0.72797		-3.972	-0.981133		-1.01164				0.5	0.00021	0.00017		0.462	-0.001108	-0.000715
0.155054	-0.00331	0.144202	-0.7695	0.154472	-0.00341	0.144532	-0.72803		-3.958	-0.972891		-1.0033				0.7	0.0002	0.00015		0.693	-0.000684	-0.000913
0.206749	-0.00499	0.192258	-0.76913	0.20597	-0.00499	0.192688	-0.72772		-3.944	-0.964692		-0.995013				0.9	0.00016	0.00011		0.924	-0.001854	-0.001625
0.258448	-0.00687	0.240318	-0.76836	0.257473	-0.00696	0.240853	-0.72724		-3.93	-0.956537		-0.986764				1.2	0.00013	8e-05		1.155	-0.003434	-0.002759
0.310136	-0.00906	0.288409	-0.76729	0.308963	-0.00914	0.289042	-0.72639		-3.916	-0.948426		-0.978557				1.4	9e-05	4e-05		1.386	-0.003944	-0.003207
0.361816	-0.01156	0.336501	-0.76595	0.360446	-0.01161	0.337235	-0.72531		-3.902	-0.940357		-0.970391				1.6	-2e-05	-8e-05		1.617	-0.004517	-0.00372
0.413492	-0.01426	0.384661	-0.76422	0.411925	-0.0143	0.385484	-0.72387		-3.888	-0.932332		-0.962267				1.8	-0.00021	-0.00024		1.848	-0.006084	-0.005166
0.465152	-0.01738	0.432804	-0.76236	0.463388	-0.01728	0.43372	-0.72222		-3.874	-0.924351		-0.954184				2.1	-0.00039	-0.00032		2.079	-0.007304	-0.006682
0.516807	-0.0206	0.481032	-0.76004	0.514845	-0.02058	0.482028	-0.72034		-3.86	-0.916412		-0.946142				2.3	-0.00039	-0.0002		2.31	-0.00925	-0.007809
0.568445	-0.02423	0.529255	-0.75764	0.566285	-0.02417	0.530335	-0.71828		-3.846	-0.908516		-0.938142				2.5	-0.0015	-0.00133		2.541	-0.011035	-0.009537
0.620056	-0.02806	0.577552	-0.7549	0.6177	-0.02798	0.578707	-0.71591		-3.832	-0.900662		-0.930183				2.8	-0.00429	-0.00426		2.772	-0.013198	-0.011525
0.671661	-0.03221	0.625855	-0.75201	0.669108	-0.03209	0.627086	-0.7134		-3.818	-0.892852		-0.922265				3	-0.00673	-0.00681		3.003	-0.014975	-0.012987
0.723249	-0.03657	0.67425	-0.74883	0.720499	-0.0364	0.67555	-0.7106		-3.804	-0.885084		-0.914389				3.2	-0.00792	-0.00795		3.234	-0.018279	-0.016379
0.774809	-0.04134	0.722652	-0.74562	0.771863	-0.04103	0.724016	-0.70769		-3.79	-0.877359		-0.906553				3.5	-0.0084	-0.00821		3.465	-0.021309	-0.019041
0.826343	-0.04622	0.771143	-0.74206	0.8232	-0.04596	0.772568	-0.70464		-3.776	-0.869675		-0.898759				3.7	-0.00835	-0.00789		3.696	-0.02428	-0.021369
0.877858	-0.05151	0.819646	-0.73849	0.874519	-0.0512	0.821129	-0.70149		-3.762	-0.862035		-0.891003				3.9	-0.00793	-0.00726		3.927	-0.026402	-0.023558
0.929346	-0.05701	0.868242	-0.73465	0.925811	-0.05665	0.869783	-0.69808		-3.748	-0.854436		-0.883305				4.2	-0.00733	-0.00653		4.158	-0.029733	-0.02574
0.980806	-0.06283	0.916867	-0.73071	0.977076	-0.06241	0.91846	-0.69459		-3.734	-0.846879		-0.875669				4.4	-0.00655	-0.00565		4.389	-0.032679	-0.028808
1.03229	-0.06896	0.965653	-0.72664	1.02836	-0.06837	0.96729	-0.69089		-3.72	-0.839365		-0.868092				4.6	-0.007	-0.00611		4.62	-0.036832	-0.032069
1.08361	-0.07531	1.01434	-0.72241	1.07949	-0.07465	1.01602	-0.68713		-3.706	-0.831892		-0.86057				4.9	-0.0092	-0.00851		4.851	-0.039656	-0.035785
1.13504	-0.08196	1.06328	-0.71806	1.13072	-0.08124	1.065	-0.68329		-3.692	-0.824461		-0.8531				5.1	-0.01116	-0.01082		5.082	-0.043945	-0.039139
1.18636	-0.08884	1.1122	-0.7136	1.18185	-0.08814	1.11395	-0.67943		-3.678	-0.817072		-0.845679				5.3	-0.01284	-0.01303		5.313	-0.050499	-0.04449
1.23769	-0.09602	1.16127	-0.70903	1.23299	-0.09525	1.16306	-0.6754		-3.664	-0.809724		-0.838305				5.5	-0.01664	-0.01736		5.544	-0.063103	-0.055267
1.28892	-0.10352	1.21035	-0.7045	1.28402	-0.10267	1.21215	-0.6714		-3.65	-0.802417		-0.830974				5.8	-0.02556	-0.02651		5.775	-0.084721	-0.071485
1.34014	-0.11124	1.25959	-0.69981	1.33506	-0.11031	1.26141	-0.66728		-3.636	-0.795152		-0.823686				6	-0.04266	-0.04328		6.006	-0.108621	-0.094319
1.39127	-0.11937	1.30885	-0.69531	1.38599	-0.11826	1.31068	-0.66324		-3.622	-0.787928		-0.816437				6.2	-0.06845	-0.06801		6.237	-0.136244	-0.118932
1.4425	-0.12762	1.35839	-0.69078	1.43703	-0.12652	1.36024	-0.65935		-3.608	-0.780746		-0.809226				6.5	-0.09966	-0.09764		6.468	-0.166764	-0.152101
1.49353	-0.13629	1.40785	-0.6865	1.48787	-0.13499	1.4097	-0.65551		-3.594	-0.773604		-0.802051				6.7	-0.12944	-0.12553		6.699	-0.199624	-0.183453
1.54456	-0.14517	1.45751	-0.68212	1.5387	-0.14378	1.45936	-0.65171		-3.58	-0.766503		-0.794912				6.9	-0.15325	-0.14733		6.93	-0.232974	-0.223616
1.59558	-0.15427	1.5073	-0.67787	1.58954	-0.15288	1.50915	-0.64813		-3.566	-0.759443		-0.787806				7.2	-0.17153	-0.16384		7.161	-0.271018	-0.264088
1.64661	-0.16379	1.55732	-0.67425	1.64038	-0.16219	1.55917	-0.6449		-3.552	-0.752423		-0.780732				7.4	-0.18771	-0.17888		7.392	-0.305516	-0.297432
1.69744	-0.17352	1.60735	-0.67085	1.69102	-0.17182	1.60916	-0.64195		-3.538	-0.745444		-0.77369				7.6	-0.20387	-0.1944		7.623	-0.336828	-0.322389
1.74836	-0.18348	1.65773	-0.66802	1.74176	-0.18177	1.65948	-0.63956		-3.524	-0.738506		-0.766678				7.9	-0.21808	-0.20764		7.854	-0.350551	-0.328451
1.79909	-0.19375	1.70813	-0.66556	1.79229	-0.19193	1.70979	-0.63742		-3.51	-0.731608		-0.759696				8.1	-0.22989	-0.217792		8.085	-0.363245	-0.33696
1.84991	-0.20434	1.7589	-0.66348	1.84293	-0.2024	1.76045	-0.63562		-3.496	-0.72475		-0.752743				8.3	-0.23933	-0.225773		8.316	-0.37776	-0.345551
1.90053	-0.21525	1.8097	-0.661762	1.89336	-0.2131	1.81111	-0.63408		-3.482	-0.717932		-0.745819				8.5	-0.24825	-0.235199		8.547	-0.39828	-0.353428
1.95115	-0.22638	1.86078	-0.6602	1.94379	-0.2241	1.862	-0.632836		-3.468	-0.711154		-0.738923				8.8	-0.26226	-0.252824		8.778	-0.417752	-0.379655
2.00176	-0.23773	1.9121	-0.658915	1.99423	-0.23543	1.91311	-0.631948		-3.454	-0.704416		-0.732056				9	-0.282906	-0.278973		9.009	-0.440243	-0.402992
2.05227	-0.2495	1.96353	-0.658023	2.04455	-0.24697	1.96433	-0.631283		-3.44	-0.697718		-0.725216				9.2	-0.308332	-0.308868		9.24	-0.463825	-0.432667
2.05227	-0.2495	1.96353	-0.658023	2.04455	-0.24697	1.96433	-0.631283		-3.426	-0.691078		-0.718404				9.5	-0.338359	-0.339819		9.471	-0.487675	-0.462624
2.1026	-0.26152	2.01489	-0.657291	2.09471	-0.25894	2.01545	-0.630951		-3.412	-0.684491		-0.711619				9.7	-0.370219	-0.367885		9.702	-0.50486	-0.492245
2.1526	-0.27373	2.06624	-0.657068	2.14473	-0.27101	2.06677	-0.631032		-3.398	-0.677954		-0.704863				9.9	-0.397853	-0.387954		9.933	-0.51998	-0.504837
2.2027	-0.28616	2.11789	-0.657161	2.19464	-0.28341	2.11816	-0.631526		-3.384	-0.671464		-0.698134				10.2	-0.418543	-0.399969		10.164	-0.529528	-0.512009
2.25269	-0.2989	2.16959	-0.657706	2.24456	-0.29601	2.1697	-0.632365		-3.37	-0.66502		-0.691433				10.4	-0.433947	-0.408144		10.395	-0.538904	-0.517606
2.30258	-0.31197	2.22135	-0.658708	2.29437	-0.30894	2.2213	-0.633654		-3.356	-0.658619		-0.68476				10.6	-0.445134	-0.414988		10.626	-0.55611	-0.525351
2.35236	-0.32527	2.27315	-0.660089	2.34408	-0.32208	2.27293	-0.635316		-3.342	-0.65226		-0.678116				10.9	-0.453376	-0.422		10.857	-0.566854	-0.539143
2.40214	-0.33888	2.32508	-0.661961	2.39379	-0.33554	2.32469	-0.637462		-3.328	-0.645942		-0.6715				11.1	-0.460567	-0.4307		11.088	-0.579348	-0.557507
2.45182	-0.35272	2.37701	-0.664228	2.44339	-0.34932	2.37645	-0.640098		-3.314	-0.639662		-0.664914				11.3	-0.468791	-0.44271		11.319	-0.601886	-0.58231
2.50149	-0.36688	2.42905	-0.667009	2.49289	-0.36333	2.42821	-0.643141		-3.3	-0.63342		-0.658357				11.5	-0.48154	-0.46089		11.55	-0.616467	-0.605936
2.55106	-0.38126	2.48108	-0.670215	2.54239	-0.37754	2.48006	-0.646602		-3.286	-0.627215		-0.651831				11.8	-0.50227	-0.48766		11.781	-0.632242	-0.620559
2.60052	-0.39596	2.53309	-0.673955	2.59168	-0.39218	2.53179	-0.65069		-3.272	-0.621045		-0.645334				12	-0.52965	-0.52039		12.012	-0.64758	-0.628416
2.64988	-0.41099	2.58507	-0.678239	2.64097	-0.40694	2.58358	-0.655116		-3.258	-0.614909		-0.638861				12.2	-0.55794	-0.55224		12.243	-0.650202	-0.624169
2.69913	-0.42624	2.63701	-0.68297	2.69025	-0.42212	2.63543	-0.660184		-3.244	-0.608807		-0.632425				12.5	-0.58581	-0.58051		12.474	-0.661458	-0.63777
2.74837	-0.44172	2.689	-0.68817	2.73933	-0.43743	2.68712	-0.665603		-3.23	-0.602738		-0.626028				12.7	-0.6131	-0.60322		12.705	-0.66495	-0.644606
2.79751	-0.45752	2.74093	-0.69392	2.7884	-0.45315	2.73886	-0.671675		-3.216	-0.596701		-0.619672				12.9	-0.63645	-0.61654		12.936	-0.6702	-0.648814
2.84654	-0.47365	2.7928	-0.70023	2.83737	-0.46909	2.79053	-0.678201		-3.202	-0.590695		-0.613357				13.2	-0.65386	-0.62098		13.167	-0.688577	-0.667821
2.89546	-0.49	2.84459	-0.70701	2.88624	-0.48526	2.84212	-0.68519		-3.188	-0.584721		-0.607082				13.4	-0.66466	-0.61989		13.398	-0.704409	-0.686098
2.94438	-0.50668	2.8964	-0.71436	2.93499	-0.50174	2.89363	-0.69273		-3.174	-0.578778		-0.600848				13.6	-0.66973	-0.61737		13.629	-0.71386	-0.688987
2.99319	-0.52358	2.94812	-0.72217	2.98374	-0.51855	2.94515	-0.70084		-3.16	-0.572864		-0.594655				13.9	-0.66909	-0.61486		13.86	-0.726219	-0.695081
3.04179	-0.54081	2.99965	-0.73056	3.03229	-0.53558	2.99647	-0.70941		-3.146	-0.566981		-0.588504				14.1	-0.66389	-0.61319		14.091	-0.73057	-0.683908
3.09038	-0.55826	3.05117	-0.73942	3.08082	-0.55284	3.04779	-0.71845		-3.132	-0.561128		-0.582395				14.3	-0.65892	-0.61626		14.322	-0.735439	-0.686562
3.13887	-0.57604	3.10259	-0.74885	3.12925	-0.57041	3.099	-0.72805		-3.118	-0.555304		-0.576327				14.6	-0.65776	-0.6263		14.553	-0.736833	-0.691966
3.18734	-0.59405	3.154	-0.75874	3.17758	-0.58831	3.1501	-0.73821		-3.104	-0.549511		-0.570301				14.8	-0.6632	-0.64363		14.784	-0.739605	-0.710661
3.23561	-0.61228	3.20518	-0.76911	3.22579	-0.60644	3.20107	-0.74883		-3.09	-0.543746		-0.564317				15	-0.67526	-0.66538		15.015	-0.744442	-0.726737
3.28377	-0.63095	3.25625	-0.78014	3.2739	-0.62488	3.25192	-0.76001		-3.076	-0.538012		-0.558374				15.2	-0.69227	-0.68785		15.246	-0.746706	-0.725706
3.33191	-0.64974	3.30728	-0.79153	3.3219	-0.64356	3.30265	-0.77164		-3.062	-0.532307		-0.552474				15.5	-0.71226	-0.70834		15.477	-0.750142	-0.734437
3.37985	-0.66885	3.35808	-0.80349	3.36979	-0.66245	3.35323	-0.78373		-3.048	-0.526632		-0.546616				15.7	-0.73103	-0.72189		15.708	-0.770573	-0.73441
3.42768	-0.6883	3.40874	-0.81601	3.41757	-0.68167	3.40368	-0.79637		-3.034	-0.520986		-0.5408				15.9	-0.74681	-0.72676		15.939	-0.783496	-0.737343
3.47549	-0.70797	3.45936	-0.82898	3.46524	-0.70122	3.45399	-0.80956		-3.02	-0.515371		-0.535026				16.2	-0.75973	-0.72532		16.17	-0.789223	-0.723283
3.52319	-0.72798	3.50984	-0.84251	3.51291	-0.72099	3.50426	-0.8232		-3.006	-0.509786		-0.529294				16.4	-0.7676	-0.71896		16.401	-0.782889	-0.726909
3.57069	-0.74821	3.56006	-0.85648	3.56036	-0.74099	3.55427	-0.83727		-2.992	-0.504232		-0.523604				16.6	-0.76854	-0.70909		16.632	-0.780455	-0.735223
3.61817	-0.76867	3.61024	-0.87091	3.6077	-0.76131	3.60414	-0.85188		-2.978	-0.498708		-0.517956				16.9	-0.76167	-0.69678		16.863	-0.781865	-0.737482
3.66543	-0.78947	3.66016	-0.88587	3.65504	-0.78186	3.65394	-0.86693		-2.964	-0.493216		-0.512349				17.1	-0.74759	-0.68347		17.094	-0.781636	-0.748757
3.71269	-0.81049	3.71001	-0.90128	3.70216	-0.80273	3.7035	-0.88251		-2.95	-0.487754		-0.506784				17.3	-0.72793	-0.67106		17.325	-0.775596	-0.749022
3.75973	-0.83184	3.75961	-0.91722	3.74917	-0.82384	3.75289	-0.89851		-2.936	-0.482324		-0.501261				17.6	-0.70375	-0.65953		17.556	-0.771994	-0.755459
3.80666	-0.85342	3.80904	-0.93359	3.79607	-0.84526	3.80212	-0.91504		-2.922	-0.476925		-0.495779				17.8	-0.67623	-0.64756		17.787	-0.774763	-0.745015
3.85357	-0.87534	3.85841	-0.95049	3.84286	-0.86692	3.85118	-0.93199		-2.908	-0.471563		-0.490339				18	-0.64738	-0.63403		18.018	-0.770489	-0.737407
3.90027	-0.89748	3.90751	-0.96781	3.88953	-0.8889	3.90008	-0.94945		-2.894	-0.466239		-0.48494				18.2	-0.62046	-0.61904		18.249	-0.754201	-0.726147
3.94685	-0.91986	3.95644	-0.98555	3.93609	-0.91112	3.94881	-0.96732		-2.88	-0.460953		-0.479582				18.5	-0.59658	-0.60096		18.48	-0.753168	-0.723618
3.99332	-0.94257	4.0052	-1.00381	3.98244	-0.93356	3.99727	-0.9856		-2.866	-0.455705		-0.474264				18.7	-0.57472	-0.57742		18.711	-0.739964	-0.719542
4.03968	-0.96551	4.05378	-1.02248	4.02878	-0.95633	4.04567	-1.00438		-2.852	-0.450495		-0.468988				18.9	-0.55314	-0.54771		18.942	-0.741221	-0.707386
4.08591	-0.98878	4.10219	-1.04166	4.0749	-0.97932	4.09378	-1.02357		-2.838	-0.445323		-0.463752				19.2	-0.52886	-0.51152		19.173	-0.719674	-0.695995
4.13193	-1.01229	4.15032	-1.06124	4.1209	-1.00265	4.14173	-1.04324		-2.824	-0.440189		-0.458556				19.4	-0.5007	-0.47096		19.404	-0.7035	-0.684808
4.17793	-1.03613	4.19837	-1.08132	4.1669	-1.02621	4.1896	-1.06331		-2.81	-0.435094		-0.4534	-0.583994			19.6	-0.468595	-0.42925		19.635	-0.680459	-0.676585
4.22372	-1.0601	4.24615	-1.1017	4.21257	-1.04999	4.23709	-1.08376		-2.796	-0.430037		-0.448284	-0.580612			19.9	-0.432705	-0.389113		19.866	-0.675106	-0.661047
4.26939	-1.08441	4.29374	-1.12257	4.25823	-1.07411	4.2845	-1.1047		-2.782	-0.425018		-0.443208	-0.577322			20.1	-0.395536	-0.354313		20.097	-0.659248	-0.653546
4.31493	-1.10905	4.34115	-1.14392	4.30378	-1.09846	4.33174	-1.12601		-2.768	-0.420037		-0.438172	-0.574121			20.3	-0.359314	-0.326495		20.328	-0.646158	-0.633087
4.36026	-1.13392	4.38828	-1.16566	4.3491	-1.12303	4.3787	-1.1477		-2.754	-0.415094		-0.433174	-0.571011			20.6	-0.323736	-0.30336		20.559	-0.631138	-0.613176
4.40557	-1.15903	4.43533	-1.18778	4.39431	-1.14794	4.42548	-1.16986		-2.74	-0.41019		-0.428216	-0.567993			20.8	-0.288674	-0.282628		20.79	-0.615962	-0.593371
4.45066	-1.18447	4.48209	-1.21037	4.43941	-1.17308	4.47208	-1.19239		-2.726	-0.405324	-0.557944	-0.423296	-0.565067			21	-0.25437	-0.262156		21.021	-0.587231	-0.559665
4.49562	-1.21015	4.52867	-1.23333	4.48428	-1.19855	4.51841	-1.21538		-2.712	-0.400496	-0.555361	-0.418415	-0.562233			21.3	-0.22053	-0.238469		21.252	-0.552949	-0.531498
4.54047	-1.23607	4.57506	-1.25667	4.52914	-1.22426	4.56465	-1.23873		-2.698	-0.395706	-0.552835	-0.413572	-0.559489			21.5	-0.19039	-0.21152		21.483	-0.516571	-0.505011
4.58509	-1.26232	4.62117	-1.28047	4.57377	-1.25019	4.61061	-1.26244		-2.684	-0.390954	-0.550366	-0.408767	-0.556839			21.7	-0.16777	-0.18347		21.714	-0.48278	-0.475782
4.6296	-1.2887	4.66709	-1.30453	4.61819	-1.27636	4.65628	-1.2865		-2.67	-0.38624	-0.547959	-0.403999	-0.554281			21.9	-0.15041	-0.15375		21.945	-0.453097	-0.445869
4.67397	-1.31552	4.71283	-1.32915	4.66259	-1.30286	4.70188	-1.31101		-2.656	-0.381564	-0.545612	-0.399269	-0.551815			22.2	-0.1345	-0.1234		22.176	-0.421728	-0.412163
4.71813	-1.34248	4.75828	-1.35402	4.70676	-1.32959	4.74719	-1.33586		-2.642	-0.376926	-0.543328	-0.394577	-0.549442			22.4	-0.11861	-0.09629		22.407	-0.376296	-0.372626
4.76216	-1.36977	4.80354	-1.37934	4.75072	-1.35666	4.79223	-1.36116		-2.628	-0.372325	-0.541111	-0.389921	-0.547158			22.6	-0.10152	-0.07448		22.638	-0.315355	-0.323441
4.80607	-1.3973	4.84861	-1.40501	4.79465	-1.38385	4.83718	-1.3867		-2.614	-0.367761	-0.538961	-0.385302	-0.544968			22.9	-0.08062	-0.0562		22.869	-0.255867	-0.271848
4.84985	-1.42507	4.8935	-1.43103	4.83836	-1.41139	4.88185	-1.41267		-2.6	-0.363235	-0.536881	-0.38072	-0.542869			23.1	-0.05498	-0.03935		23.1	-0.223042	-0.235096
4.8934	-1.45317	4.9381	-1.45748	4.88195	-1.43925	4.92633	-1.43907		-2.586	-0.358747	-0.534873	-0.376174	-0.54086			23.3	-0.03041	-0.02722		23.331	-0.217913	-0.209525
4.93683	-1.48151	4.98251	-1.48428	4.92531	-1.46725	4.97053	-1.46571		-2.572	-0.354295	-0.532938	-0.371663	-0.538943			23.6	-0.01226	-0.02143		23.562	-0.221021	-0.200742
4.98003	-1.51009	5.02664	-1.5114	4.96855	-1.49559	5.01456	-1.49277		-2.558	-0.34988	-0.53108	-0.367189	-0.537116			23.8	-0.00031	-0.01809		23.793	-0.219524	-0.201783
5.0231	-1.539	5.07057	-1.53896	5.01157	-1.52416	5.0583	-1.52015		-2.544	-0.345502	-0.529306	-0.362749	-0.535379			24	0.00804	-0.01237		24.024	-0.212759	-0.199948
5.06595	-1.56806	5.11422	-1.56675	5.05456	-1.55306	5.10195	-1.54796		-2.53	-0.34116	-0.527764	-0.358345	-0.533731			24.3	0.01433	-0.00242		24.255	-0.206192	-0.194768
5.10876	-1.59745	5.15778	-1.59496	5.09722	-1.5821	5.14523	-1.57598		-2.516	-0.336855	-0.52632	-0.353975	-0.532173			24.5	0.01758	0.00907		24.486	-0.193794	-0.188645
5.15125	-1.62708	5.20096	-1.62349	5.13976	-1.61147	5.18832	-1.60441		-2.502	-0.332586	-0.524976	-0.349641	-0.530702			24.7	0.01774	0.01911		24.717	-0.187208	-0.183492
5.1936	-1.65705	5.24394	-1.65244	5.18217	-1.64108	5.23123	-1.63316		-2.488	-0.328353	-0.52373	-0.34534	-0.529319			24.9	0.01526	0.02493		24.948	-0.183674	-0.178645
5.23583	-1.68715	5.28674	-1.68161	5.22445	-1.67103	5.27397	-1.66231		-2.474	-0.324156	-0.522585	-0.341073	-0.528023			25.2	0.01187	0.02608		25.179	-0.181878	-0.17636
5.27792	-1.7176	5.32935	-1.71119	5.26641	-1.70111	5.31632	-1.69167		-2.46	-0.319994	-0.521537	-0.336841	-0.526814			25.4	0.0088	0.02299		25.41	-0.183106	-0.1734
5.31968	-1.74828	5.37158	-1.74108	5.30833	-1.73152	5.35859	-1.72143		-2.446	-0.315868	-0.52059	-0.332641	-0.525691			25.6	0.0057	0.01573		25.641	-0.183894	-0.17257
5.36141	-1.7792	5.41371	-1.77128	5.35003	-1.76217	5.40057	-1.75149		-2.432	-0.311777	-0.519741	-0.328475	-0.524652			25.9	0.00463	0.00796		25.872	-0.183048	-0.171762
5.4029	-1.81046	5.45556	-1.80188	5.39149	-1.79306	5.44228	-1.78185		-2.418	-0.307722	-0.518992	-0.324342	-0.523698			26.1	0.00646	0.00234		26.103	-0.181952	-0.173067
5.44416	-1.84186	5.49712	-1.83269	5.43283	-1.82418	5.48381	-1.8125		-2.404	-0.303701	-0.518341	-0.320242	-0.522827			26.3	0.0103	-0.00027		26.334	-0.181773	-0.174303
5.48529	-1.8736	5.53849	-1.8639	5.47393	-1.85564	5.52505	-1.84356		-2.39	-0.299714	-0.517787	-0.316174	-0.522038			26.6	0.01491	0.00053		26.565	-0.180674	-0.175473
5.52617	-1.90558	5.57957	-1.89541	5.5149	-1.88723	5.56611	-1.8748		-2.376	-0.295762	-0.51733	-0.312139	-0.521332			26.8	0.01729	0.00325		26.796	-0.179827	-0.174711
5.56693	-1.93779	5.62048	-1.92721	5.55564	-1.91916	5.60691	-1.90642		-2.362	-0.291844	-0.51697	-0.308135	-0.520707			27	0.01632	0.00747		27.027	-0.179047	-0.172713
5.60744	-1.97024	5.66111	-1.95928	5.59624	-1.95133	5.64753	-1.93832		-2.348	-0.28796	-0.516706	-0.304163	-0.520161			27.3	0.01323	0.01258		27.258	-0.177573	-0.16984
5.64782	-2.00304	5.70157	-1.99173	5.63661	-1.98373	5.68788	-1.97048		-2.334	-0.28411	-0.516535	-0.300223	-0.519695			27.5	0.00916	0.01623		27.489	-0.176531	-0.167566
5.68796	-2.03597	5.74175	-2.02435	5.67675	-2.01637	5.72797	-2.00292		-2.32	-0.280293	-0.516459	-0.296314	-0.519307			27.7	0.00398	0.01578		27.72	-0.17487	-0.165435
5.72786	-2.06924	5.78166	-2.05735	5.71675	-2.04935	5.76789	-2.03572		-2.306	-0.27651	-0.516476	-0.292436	-0.518996			28	-0.00145	0.01122		27.951	-0.171593	-0.163856
5.76762	-2.10264	5.8214	-2.09052	5.75661	-2.08246	5.80764	-2.0687		-2.292	-0.27276	-0.516584	-0.288588	-0.518761			28.2	-0.00467	0.00481		28.182	-0.169006	-0.160924
5.80714	-2.13639	5.86086	-2.12407	5.79614	-2.1159	5.84702	-2.10204		-2.278	-0.269042	-0.516783	-0.284772	-0.518602			28.4	-0.00508	-0.00234		28.413	-0.165292	-0.15895
5.84651	-2.17037	5.90015	-2.15788	5.83553	-2.14958	5.88623	-2.13564		-2.264	-0.265357	-0.517072	-0.280985	-0.518517			28.6	-0.00387	-0.00886		28.644	-0.16264	-0.155701
5.88565	-2.20459	5.93916	-2.19197	5.87478	-2.1834	5.92528	-2.16941		-2.25	-0.261704	-0.517448	-0.277229	-0.518504			28.9	-0.00373	-0.01383		28.875	-0.160458	-0.153522
5.92454	-2.23905	5.9779	-2.22632	5.91369	-2.21755	5.96396	-2.20354		-2.236	-0.258084	-0.517912	-0.273503	-0.518563			29.1	-0.00422	-0.01474		29.106	-0.158476	-0.151374
5.96329	-2.27374	6.01647	-2.26094	5.95246	-2.25194	6.00247	-2.23794		-2.222	-0.254495	-0.518462	-0.269806	-0.518694			29.3	-0.00338	-0.0105		29.337	-0.156182	-0.14967
6.0018	-2.30868	6.05476	-2.29582	5.9911	-2.28656	6.04081	-2.27259		-2.208	-0.250938	-0.519096	-0.266139	-0.518895			29.6	-0.00132	-0.00365		29.568	-0.154787	-0.147696
6.04006	-2.34394	6.09278	-2.33107	6.02939	-2.32141	6.07879	-2.3075		-2.194	-0.247413	-0.519811	-0.262501	-0.519165			29.8	0.00259	0.00464		29.799	-0.153125	-0.14603
6.07808	-2.37935	6.13053	-2.36647	6.06754	-2.3565	6.1166	-2.34267		-2.18	-0.243918	-0.520609	-0.258892	-0.519502			30	0.00642	0.01165		30.03	-0.151881	-0.144853
6.11595	-2.41499	6.1681	-2.40214	6.10555	-2.39183	6.15424	-2.37809		-2.166	-0.240455	-0.521486	-0.255312	-0.519906			30.3	0.00853	0.01544		30.261	-0.150813	-0.143922
6.15368	-2.45096	6.2055	-2.43816	6.14322	-2.42748	6.19152	-2.41387		-2.152	-0.237022	-0.522442	-0.251761	-0.520376			30.5	0.00994	0.01674		30.492	-0.150417	-0.143359
6.19106	-2.48707	6.24253	-2.47435	6.18074	-2.46327	6.22864	-2.4498		-2.138	-0.233621	-0.523474	-0.248238	-0.52091			30.7	0.01085	0.0155		30.723	-0.149219	-0.143047
6.22829	-2.52342	6.27939	-2.51078	6.21802	-2.49929	6.26548	-2.48598		-2.124	-0.230249	-0.524581	-0.244743	-0.521506			31	0.01161	0.01258		30.954	-0.148729	-0.142867
6.26528	-2.56009	6.31598	-2.54758	6.25506	-2.53554	6.30207	-2.5224		-2.11	-0.226907	-0.525761	-0.241277	-0.522165			31.2	0.01195	0.00859		31.185	-0.147601	-0.142104
6.30201	-2.5969	6.35229	-2.58452	6.29195	-2.57203	6.33848	-2.55908		-2.096	-0.223596	-0.527014	-0.237838	-0.522886			31.4	0.01212	0.00502		31.416	-0.148176	-0.142015
6.3385	-2.63395	6.38834	-2.62171	6.3286	-2.60884	6.37464	-2.59611		-2.082	-0.220314	-0.528336	-0.234428	-0.523666			31.6	0.01263	0.00358		31.647	-0.148287	-0.142787
6.37483	-2.67122	6.42421	-2.65916	6.365	-2.64579	6.41052	-2.63328		-2.068	-0.217061	-0.529727	-0.231044	-0.524504			31.9	0.01199	0.00374		31.878	-0.149384	-0.143581
6.41092	-2.70882	6.45981	-2.69695	6.40116	-2.68296	6.44614	-2.67069		-2.054	-0.213838	-0.531184	-0.227689	-0.525399			32.1	0.00869	0.00427		32.109	-0.14975	-0.143889
6.44676	-2.74656	6.49513	-2.73489	6.43707	-2.72036	6.4815	-2.70834		-2.04	-0.210643	-0.532707	-0.22436	-0.526351			36.9	-0.00468	6e-05
6.48235	-2.78452	6.53019	-2.77307	6.47283	-2.75799	6.5167	-2.74624		-2.026	-0.207478	-0.534292	-0.221059	-0.527357			41.8	0.00461	-0.00107
6.51778	-2.82271	6.56508	-2.8115	6.50835	-2.79584	6.55162	-2.78438		-2.012	-0.204341	-0.535939	-0.217785	-0.528418			46.6	-0.0033	0.00168
6.55287	-2.86113	6.59959	-2.85017	6.54362	-2.83392	6.58629	-2.82275		-1.998	-0.201232	-0.537645	-0.214537	-0.529532			51.5	0.0019	-0.00187
6.5878	-2.89978	6.63393	-2.88908	6.57865	-2.87223	6.62069	-2.86136		-1.984	-0.198152	-0.539411	-0.211316	-0.530695			56.3	-0.00071	0.0017
6.62248	-2.93864	6.66801	-2.92822	6.61342	-2.91065	6.65483	-2.9001		-1.97	-0.195099	-0.54123	-0.208122	-0.53191			61.1	-0.00019	-0.00136
6.65691	-2.97764	6.70181	-2.9675	6.64795	-2.9494	6.6887	-2.93917		-1.956	-0.192075	-0.543105	-0.204954	-0.533174			66	0.00076	0.00091
6.69119	-3.01695	6.73544	-3.00711	6.68233	-2.98828	6.72241	-2.97837		-1.942	-0.189078	-0.545033	-0.201812	-0.534485			70.8	-0.00105	-0.00049
6.72512	-3.05639	6.76871	-3.04686	6.71647	-3.02747	6.75586	-3.01791		-1.928	-0.186108	-0.54701	-0.198697	-0.535844			75.7	0.00108	0.00012
6.75879	-3.09615	6.8017	-3.08694	6.75025	-3.06678	6.78894	-3.05756		-1.914	-0.183166	-0.549037	-0.195607	-0.537247			80.5	-0.00097	0.00013
6.79231	-3.13602	6.83453	-3.12714	6.78389	-3.1063	6.82187	-3.09745		-1.9	-0.180251	-0.551111	-0.192544	-0.538695			85.3	0.00075	-0.0003
6.82558	-3.17611	6.86708	-3.16757	6.81728	-3.14604	6.85453	-3.13755		-1.886	-0.177362	-0.553231	-0.189506	-0.540185			90.2	-0.00051	0.00036
6.8585	-3.21642	6.89927	-3.20822	6.85042	-3.186	6.88693	-3.17787		-1.872	-0.1745	-0.555393	-0.186494	-0.541718			95	0.00028	-0.00036
6.89127	-3.25684	6.93129	-3.24899	6.88332	-3.22606	6.91907	-3.21831		-1.858	-0.171665	-0.557598	-0.183507	-0.543292			99.9	-0.0001	0.0003
6.92378	-3.29757	6.96305	-3.29008	6.91597	-3.26644	6.95096	-3.25907		-1.844	-0.168856	-0.559844	-0.180546	-0.544904			104.7	-4e-05	-0.00022
6.95605	-3.33841	6.99454	-3.33129	6.94838	-3.30692	6.98258	-3.29993		-1.83	-0.166074	-0.562126	-0.17761	-0.546555			109.5	0.00011	0.00013
6.98806	-3.37946	7.02577	-3.3727	6.98054	-3.34762	7.01395	-3.34101		-1.816	-0.163317	-0.564446	-0.1747	-0.548243			114.4	-0.00015	-5e-05
7.01983	-3.42071	7.05673	-3.41433	7.01245	-3.38851	7.04507	-3.38229		-1.802	-0.160586	-0.566801	-0.171814	-0.549967			119.2	0.00013	-2e-05
7.05134	-3.46207	7.08743	-3.45607	7.04422	-3.42951	7.07603	-3.42368		-1.788	-0.157881	-0.569188	-0.168954	-0.551725			124.1	-0.00011	6e-05
7.08261	-3.50373	7.11787	-3.4981	7.07565	-3.4708	7.10663	-3.46536		-1.774	-0.155201	-0.571608	-0.166119	-0.553517			128.9	6e-05	-9e-05
7.11363	-3.54549	7.14805	-3.54024	7.10683	-3.5122	7.13699	-3.50715		-1.76	-0.152546	-0.574056	-0.163309	-0.555342			133.7	-3e-05	8e-05
7.1444	-3.58744	7.17797	-3.58258	7.13778	-3.55369	7.16709	-3.54902		-1.746	-0.149917	-0.576533	-0.160523	-0.557198			138.6	-1e-05	-8e-05
7.17493	-3.62949	7.20763	-3.62501	7.16848	-3.59547	7.19695	-3.59119		-1.732	-0.147313	-0.579036	-0.157763	-0.559084			143.4	2e-05	6e-05
7.20521	-3.67183	7.23704	-3.66773	7.19905	-3.63734	7.22665	-3.63344		-1.718	-0.144734	-0.581564	-0.155027	-0.560999			148.3	-4e-05	-5e-05
7.23525	-3.71426	7.2662	-3.71054	7.22928	-3.67939	7.25602	-3.67587		-1.704	-0.14218	-0.584114	-0.152315	-0.562942			153.1	4e-05	2e-05
7.26505	-3.75677	7.2951	-3.75343	7.25927	-3.72163	7.28514	-3.71849		-1.69	-0.13965	-0.586688	-0.149629	-0.564912			157.9	-4e-05	-1e-05
7.29461	-3.79956	7.32376	-3.7966	7.28903	-3.76395	7.31403	-3.76117		-1.676	-0.137145	-0.58928	-0.146967	-0.566906			162.8	2e-05	-1e-05
7.32393	-3.84243	7.35217	-3.83984	7.31856	-3.80644	7.34267	-3.80403		-1.662	-0.134664	-0.591891	-0.144329	-0.568927			167.6	-2e-05	1e-05
7.35301	-3.88538	7.38033	-3.88315	7.34786	-3.84911	7.37109	-3.84705		-1.648	-0.132208	-0.594518	-0.141716	-0.57097			172.5	0	-2e-05
7.38176	-3.9286	7.40816	-3.92672	7.37683	-3.89184	7.39917	-3.89013		-1.634	-0.129776	-0.597162	-0.139127	-0.573035			177.3	0	1e-05
7.41038	-3.97188	7.43585	-3.97036	7.40568	-3.93474	7.42713	-3.93336		-1.62	-0.127367	-0.599819	-0.136562	-0.575122			182.1	-1e-05	-2e-05
7.43877	-4.01523	7.4633	-4.01405	7.4343	-3.9778	7.45486	-3.97674		-1.606	-0.124983	-0.602488	-0.134022	-0.577229			187	1e-05	1e-05
7.46683	-4.05884	7.49042	-4.05798	7.46261	-4.02091	7.48227	-4.02017		-1.592	-0.122623	-0.605168	-0.131506	-0.579354			191.8	-1e-05	-1e-05
7.49466	-4.10249	7.51732	-4.10195	7.4908	-4.06418	7.50957	-4.06373		-1.578	-0.120286	-0.607858	-0.129014	-0.581499			196.7	1e-05	0
7.52227	-4.14621	7.54399	-4.14597	7.51867	-4.10759	7.53656	-4.10741		-1.564	-0.117973	-0.610556	-0.126546	-0.583659			201.5	-1e-05	-1e-05
7.54977	-4.19006	7.57054	-4.19011	7.54634	-4.15104	7.56333	-4.15112		-1.55	-0.115683	-0.613261	-0.124102	-0.585836			206.3	0	-1e-05
7.57695	-4.23405	7.59678	-4.23436	7.5738	-4.19453	7.58991	-4.19484		-1.536	-0.113417	-0.615971	-0.121683	-0.588028			211.2	0	0
7.60382	-4.27807	7.62271	-4.27863	7.60106	-4.23824	7.6163	-4.23877		-1.522	-0.111174	-0.618685	-0.119287	-0.590233			216	0	-1e-05
7.63058	-4.32222	7.64854	-4.32301	7.62802	-4.28187	7.64239	-4.28259		-1.508	-0.108955	-0.621402	-0.116916	-0.592453			220.8	0	0
7.65714	-4.36639	7.67417	-4.36738	7.65489	-4.32572	7.6684	-4.3266		-1.494	-0.106758	-0.62412	-0.114568	-0.594683			225.7	-1e-05	-1e-05
7.6834	-4.41066	7.69951	-4.41183	7.68147	-4.36958	7.69413	-4.37059		-1.48	-0.104585	-0.626839	-0.112244	-0.596924			230.5	0	0
7.70947	-4.45494	7.72466	-4.45625	7.70787	-4.41343	7.7197	-4.41454		-1.466	-0.102435	-0.629556	-0.109945	-0.599175			235.4	-1e-05	-1e-05
7.73535	-4.49932	7.74964	-4.50074	7.73409	-4.45736	7.7451	-4.45853		-1.452	-0.100307	-0.632272	-0.107669	-0.601436			240.2	0	0
7.76105	-4.54368	7.77445	-4.54517	7.76014	-4.50127	7.77034	-4.50246		-1.438	-0.098203	-0.634984	-0.105418	-0.603704			245	0	-1e-05
7.78647	-4.5881	7.799	-4.58962	7.78602	-4.54526	7.79544	-4.54642		-1.424	-0.096121	-0.637691	-0.10319	-0.605979			249.9	0	0
7.81182	-4.63249	7.82349	-4.63399	7.81165	-4.58919	7.82031	-4.59028		-1.41	-0.094062	-0.640394	-0.100986	-0.60826			254.7	0	0
7.83691	-4.67694	7.84775	-4.67835	7.83712	-4.63314	7.84504	-4.63412		-1.396	-0.092026	-0.643089	-0.098806	-0.610547			259.6	0	-1e-05
7.86185	-4.72131	7.87187	-4.72259	7.86246	-4.67699	7.86965	-4.67782		-1.382	-0.090012	-0.645777	-0.096649	-0.612838			264.4	0	0
7.88664	-4.76567	7.89587	-4.76678	7.88757	-4.72087	7.89406	-4.72149		-1.368	-0.088021	-0.648455	-0.094517	-0.615132			269.2	0	-1e-05
7.91119	-4.80991	7.91964	-4.81079	7.91267	-4.76457	7.91849	-4.76496		-1.354	-0.086053	-0.651124	-0.092409	-0.617429			274.1	0	0
7.93563	-4.85405	7.94333	-4.85464	7.93758	-4.8082	7.94275	-4.80838		-1.34	-0.084106	-0.653783	-0.090324	-0.619727			278.9	0	0
7.95996	-4.89808	7.96694	-4.89834	7.96248	-4.85146	7.967	-4.85151		-1.326	-0.082183	-0.656429	-0.088263	-0.622027			283.8	0	0
7.98421	-4.94187	7.99046	-4.9419	7.98737	-4.89473	7.99127	-4.89458		-1.312	-0.080281	-0.659063	-0.086226	-0.624326			288.6	0	0
8.00849	-4.98532	8.014	-4.98521	8.01252	-4.93765	8.01557	-4.93756		-1.298	-0.078402	-0.661683	-0.084213	-0.626624			293.4	0	0
8.03278	-5.02882	8.03759	-5.0285	8.03794	-4.9804	8.04004	-4.98013		-1.284	-0.076546	-0.664289	-0.082224	-0.62892			298.3	0	0
8.05731	-5.07176	8.06107	-5.07156	8.06378	-5.02329	8.06382	-5.0233		-1.27	-0.074711	-0.66688	-0.080258	-0.631214			303.1	0	0
8.08215	-5.1146	8.08468	-5.11424						-1.256	-0.072899	-0.669455	-0.078317	-0.633505			308	0	0
8.10759	-5.15763	8.10763	-5.15764						-1.242	-0.071109	-0.672013	-0.076399	-0.635791			312.8	0	0
									-1.228	-0.069341	-0.674553	-0.074505	-0.638072			317.6	0	0
									-1.214	-0.067595	-0.677075	-0.072635	-0.640347			322.5	0	0
									-1.2	-0.065871	-0.679577	-0.070788	-0.642616			327.3	0	0
									-1.186	-0.06417	-0.68206	-0.068966	-0.644878			332.2	0	0
									-1.172	-0.06249	-0.684523	-0.067167	-0.647131			337	0	0
									-1.158	-0.060833	-0.686964	-0.065392	-0.649376			341.8	0	0
									-1.144	-0.059198	-0.689384	-0.063641	-0.651611			346.7	0	0
									-1.13	-0.057584	-0.691781	-0.061914	-0.653837			351.5	0	0
									-1.116	-0.055993	-0.694155	-0.060211	-0.656051			356.4	0	0
									-1.102	-0.054424	-0.696505	-0.058532	-0.658254			361.2	0	0
									-1.088	-0.052876	-0.698832	-0.056876	-0.660444			366	0	0
									-1.074	-0.051351	-0.701134	-0.055244	-0.662621			370.9	0	0
									-1.06	-0.049848	-0.703412	-0.053637	-0.664786			375.7	0	0
									-1.046	-0.048367	-0.705665	-0.052053	-0.666935			380.5	0	0
									-1.032	-0.046908	-0.70789	-0.050493	-0.669071			385.4	0	0
									-1.018	-0.045471	-0.71009	-0.048957	-0.67119			390.2	0	0
									-1.004	-0.044055	-0.712263	-0.047444	-0.673293			395.1	0	0
									-0.99	-0.042662	-0.71441	-0.045956	-0.675381			399.9	0	0
									-0.976	-0.041291	-0.716527	-0.044492	-0.67745			404.7	0	0
									-0.962	-0.039942	-0.718619	-0.043051	-0.679502			409.6	0	0
									-0.948	-0.038615	-0.720681	-0.041635	-0.681536			414.4	0	0
									-0.934	-0.03731	-0.722715	-0.040242	-0.683551			419.3	0	0
									-0.92	-0.036028	-0.724721	-0.038873	-0.685546			424.1	0	0
									-0.906	-0.034767	-0.726697	-0.037529	-0.687522			428.9	0	0
									-0.892	-0.033528	-0.728645	-0.036208	-0.689477			433.8	0	0
									-0.878	-0.032312	-0.730563	-0.034911	-0.691411			438.6	0	0
									-0.864	-0.031117	-0.732451	-0.033638	-0.693323			443.5	0	0
									-0.85	-0.029945	-0.734309	-0.032389	-0.695213			448.3	0	0
									-0.836	-0.028795	-0.736138	-0.031163	-0.697082			453.1	0	0
									-0.822	-0.027668	-0.737936	-0.029962	-0.698926			458	0	0
									-0.808	-0.026562	-0.739704	-0.028785	-0.700748			462.8	0	0
									-0.794	-0.025479	-0.741441	-0.027631	-0.702546			467.7	0	0
									-0.78	-0.024418	-0.743147	-0.026502	-0.704319			472.5	0	0
									-0.766	-0.023379	-0.744823	-0.025396	-0.706069			477.3	0	0
									-0.752	-0.022362	-0.746468	-0.024314	-0.707793			482.2	0	0
									-0.738	-0.021368	-0.748081	-0.023256	-0.709491			487	0	0
									-0.724	-0.020396	-0.749664	-0.022222	-0.711163			491.9	0	0
									-0.71	-0.019447	-0.751216	-0.021212	-0.712809			496.7	0	0
									-0.696	-0.018519	-0.752736	-0.020225	-0.714429			501.5	0	0
									-0.682	-0.017615	-0.754225	-0.019263	-0.716021			506.4	0	0
									-0.668	-0.016732	-0.755683	-0.018324	-0.717585			511.2	0	0
									-0.654	-0.015873	-0.757108	-0.017409	-0.719123			516.1	0	0
									-0.64	-0.015035	-0.758504	-0.016518	-0.720632			520.9	0	0
									-0.626	-0.01422	-0.759867	-0.015651	-0.722113			525.7	0	0
									-0.612	-0.013428	-0.761199	-0.014807	-0.723564			530.6	0	0
									-0.598	-0.012658	-0.7625	-0.013987	-0.724986			535.4	0	0
									-0.584	-0.011911	-0.763769	-0.013191	-0.72638			540.3	0	0
									-0.57	-0.011186	-0.765007	-0.012418	-0.727743			545.1	0	0
									-0.556	-0.010484	-0.766213	-0.011669	-0.729077			549.9	0	0
									-0.542	-0.009805	-0.767388	-0.010944	-0.73038			554.8	0	0
									-0.528	-0.009148	-0.768531	-0.010242	-0.731653			559.6	0	0
									-0.514	-0.008514	-0.769644	-0.009564	-0.732895			564.4	0	0
									-0.5	-0.007902	-0.770725	-0.00891	-0.734105			569.3	0	0
									-0.486	-0.007313	-0.771774	-0.008279	-0.735285			574.1	0	0
									-0.472	-0.006747	-0.772792	-0.007671	-0.736433			579	0	0
									-0.458	-0.006204	-0.773779	-0.007087	-0.737549			583.8	0	0
									-0.444	-0.005683	-0.774735	-0.006527	-0.738633			588.6	0	0
									-0.43	-0.005185	-0.77566	-0.005989	-0.739684			593.5	0	0
									-0.416	-0.00471	-0.776554	-0.005476	-0.740703			598.3	0	0
									-0.402	-0.004258	-0.777417	-0.004985	-0.74169			603.2	0	0
									-0.388	-0.003828	-0.778249	-0.004518	-0.742644			608	0	0
									-0.374	-0.003421	-0.77905	-0.004074	-0.743564			612.8	0	0
									-0.36	-0.003037	-0.779821	-0.003653	-0.744451			617.7	0	0
									-0.346	-0.002676	-0.780559	-0.003256	-0.745305			622.5	0	0
									-0.332	-0.002338	-0.781268	-0.002881	-0.746125			627.4	0	0
									-0.318	-0.002022	-0.781946	-0.00253	-0.746912			632.2	0	0
									-0.304	-0.00173	-0.782594	-0.002202	-0.747664			637	0	0
									-0.29	-0.00146	-0.783211	-0.001896	-0.748383			641.9	0	0
									-0.276	-0.001213	-0.783798	-0.001614	-0.749067			646.7	0	0
									-0.262	-0.000989	-0.784353	-0.001355	-0.749718			651.6	0	0
									-0.248	-0.000788	-0.784879	-0.001118	-0.750333			656.4	0	0
									-0.234	-0.000609	-0.785374	-0.000904	-0.750914			661.2	0	0
									-0.22	-0.000454	-0.785839	-0.000713	-0.75146			666.1	0	0
									-0.206	-0.000321	-0.786274	-0.000545	-0.751973			670.9	0	0
									-0.192	-0.000211	-0.786678	-0.0004	-0.752449			675.8	0	0
									-0.178	-0.000124	-0.787053	-0.000277	-0.752891			680.6	0	0
									-0.164	-6e-05	-0.787397	-0.000176	-0.753297			685.4	0	0
									-0.15	-1.9e-05	-0.787712	-9.9e-05	-0.753669			690.3	0	0
									-0.136	0	-0.787996	-4.3e-05	-0.754006			695.1	0	0
									-0.122	-4e-06	-0.78825	-1e-05	-0.754307			700	0	0
									-0.108	-3.1e-05	-0.788474	0	-0.754573			704.8	0	0
									-0.094	-8.1e-05	-0.788668	-1.1e-05	-0.754803			709.6	0	0
									-0.08	-0.000154	-0.788833	-4.5e-05	-0.754999			714.5	0	0
									-0.066	-0.000249	-0.788968	-0.000102	-0.755158			719.3	0	0
									-0.052	-0.000367	-0.789072	-0.00018	-0.755282			724.2	0	0
									-0.038	-0.000508	-0.789146	-0.00028	-0.755371			729	0	0
									-0.024	-0.000672	-0.789192	-0.000403	-0.755424			733.8	0	0
									-0.01	-0.000858	-0.789206	-0.000547	-0.755442			738.7	0	0
																743.5	0	0
																748.3	0	0
																753.2	0	0
																758	0	0
																762.9	0	0
																767.7	0	0
																772.5	0	0
																777.4	0	0
																782.2	0	0
																787.1	0	0
																791.9	0	0
																796.7	0	0
																801.6	0	0
																806.4	0	0
																811.3	0	0
																816.1	0	0
																820.9	0	0
																825.8	0	0
																830.6	0	0
																835.5	0	0
																840.3	0	0
																845.1	0	0
																850	0	0
																854.8	0	0
																859.7	0	0
																864.5	0	0
																869.3	0	0
																874.2	0	0
																879	0	0
																883.9	0	0
																888.7	0	0
																893.5	0	0
																898.4	0	0
																903.2	0	0
																908.1	0	0
																912.9	0	0
																917.7	0	0
																922.6	0	0
																927.4	0	0
																932.2	0	0
																937.1	0	0
																941.9	0	0
																946.8	0	0
																951.6	0	0
																956.4	0	0
																961.3	0	0
																966.1	0	0
																971	0	0
																975.8	0	0
																980.6	0	0
																985.5	0	0
																990.3	0	0
																995.2	0	0
																1000	0	0

## Sheet: G tensile
g1	sim	g2	sim	g3	sim	g	meas
strain	stress	strain	stress	strain	stress	strain	stress
0	0	0	0	0	0	-0.368144	-0.00380152
0.021675	0.0072962	0.021676	0.0068717	0.021675	0.0077914	-0.366568	-0.00374068
0.042543	0.014153	0.042547	0.01335	0.042543	0.015112	-0.363629	-0.00411961
0.062643	0.020612	0.062654	0.019471	0.062642	0.022007	-0.361131	-0.00440735
0.082016	0.02671	0.08204	0.025268	0.082015	0.028517	-0.358856	-0.00452032
0.1007	0.032481	0.10075	0.030771	0.1007	0.034675	-0.35663	-0.00415031
0.11874	0.037956	0.11881	0.036011	0.11873	0.040517	-0.354253	-0.0039464
0.13616	0.043292	0.13627	0.041131	0.13615	0.046209	-0.352019	-0.00451799
0.153	0.0484	0.15316	0.046047	0.15299	0.051658	-0.349629	-0.00429191
0.1693	0.053297	0.16952	0.050775	0.16929	0.056881	-0.347422	-0.00418388
0.18509	0.057999	0.18537	0.055328	0.18507	0.061895	-0.345187	-0.00383991
0.20039	0.062519	0.20076	0.059719	0.20038	0.066714	-0.342726	-0.003838
0.21605	0.066871	0.21581	0.063959	0.21606	0.071353	-0.340654	-0.00422337
0.23202	0.071066	0.23175	0.068059	0.23203	0.075825	-0.338349	-0.00418158
0.24773	0.075116	0.24743	0.072029	0.24774	0.08014	-0.336024	-0.00413068
0.26318	0.07903	0.26285	0.075878	0.26319	0.08431	-0.333864	-0.00393967
0.27838	0.082818	0.27802	0.079613	0.2784	0.088345	-0.331532	-0.00394203
0.29335	0.086488	0.29296	0.083244	0.29337	0.092255	-0.329407	-0.00383541
0.30808	0.090048	0.30766	0.086776	0.3081	0.096047	-0.327077	-0.00395064
0.32259	0.093506	0.32213	0.090218	0.32261	0.099729	-0.324821	-0.00386205
0.33688	0.097486	0.33639	0.094603	0.33692	0.10394	-0.322702	-0.00419539
0.35099	0.10199	0.35044	0.09907	0.35103	0.10878	-0.320462	-0.00383356
0.3649	0.10676	0.36428	0.10354	0.36494	0.11386	-0.318203	-0.00415957
0.37861	0.11153	0.37792	0.108	0.37865	0.11894	-0.316015	-0.00369976
0.39212	0.11631	0.39137	0.11247	0.39216	0.12404	-0.313849	-0.00354052
0.40545	0.12111	0.40464	0.11719	0.40549	0.12915	-0.311614	-0.00397364
0.41859	0.12592	0.41772	0.12194	0.41864	0.13427	-0.309407	-0.00365778
0.43156	0.13074	0.43064	0.12672	0.4316	0.13941	-0.307213	-0.00430066
0.44435	0.13558	0.4434	0.13152	0.4444	0.14456	-0.305057	-0.00397932
0.45697	0.14044	0.45598	0.13634	0.45702	0.14974	-0.302834	-0.00403696
0.46943	0.14531	0.4684	0.14118	0.46948	0.15493	-0.300654	-0.00381125
0.48173	0.15021	0.48067	0.14605	0.48178	0.16014	-0.298497	-0.0038406
0.49387	0.15512	0.49277	0.15094	0.49393	0.16537	-0.2964	-0.00378123
0.50586	0.16006	0.50473	0.15586	0.50592	0.17063	-0.294122	-0.00410095
0.51771	0.16502	0.51654	0.1608	0.51776	0.17591	-0.292018	-0.00387781
0.5294	0.17	0.5282	0.16577	0.52946	0.18121	-0.289943	-0.00347987
0.54096	0.175	0.53973	0.17077	0.54102	0.18654	-0.28768	-0.00370674
0.55238	0.18003	0.55112	0.17579	0.55244	0.19189	-0.28559	-0.00461339
0.56366	0.18508	0.56237	0.18085	0.56373	0.19727	-0.283399	-0.00383181
0.57481	0.19016	0.57349	0.18594	0.57488	0.20267	-0.281319	-0.00385192
0.58584	0.19527	0.58449	0.19105	0.58591	0.20811	-0.279234	-0.00367748
0.59674	0.2004	0.59536	0.1962	0.59681	0.21357	-0.276931	-0.00366937
0.60751	0.20555	0.60611	0.20137	0.60758	0.21906	-0.274975	-0.00409415
0.61817	0.21074	0.61674	0.20658	0.61824	0.22458	-0.27284	-0.00400998
0.6287	0.21596	0.62725	0.21182	0.62878	0.23012	-0.270638	-0.00392564
0.63913	0.2212	0.63765	0.2171	0.6392	0.2357	-0.268631	-0.00379238
0.64944	0.22647	0.64794	0.2224	0.64951	0.24131	-0.266415	-0.00325521
0.65964	0.23177	0.65812	0.22774	0.65971	0.24696	-0.264448	-0.00372218
0.66973	0.2371	0.66819	0.23311	0.66981	0.25263	-0.262288	-0.00370875
0.67972	0.24247	0.67816	0.23852	0.67979	0.25834	-0.260149	-0.00371455
0.6896	0.24786	0.68802	0.24396	0.68968	0.26407	-0.258185	-0.00391382
0.69938	0.25328	0.69779	0.24944	0.69946	0.26985	-0.256024	-0.00365289
0.70907	0.25874	0.70745	0.25495	0.70915	0.27565	-0.253937	-0.00354158
0.71865	0.26423	0.71703	0.2605	0.71873	0.28149	-0.251901	-0.00362482
0.72814	0.26975	0.7265	0.26609	0.72823	0.28736	-0.249822	-0.00353739
0.73754	0.2753	0.73589	0.27171	0.73762	0.29327	-0.247794	-0.00346416
0.74685	0.28089	0.74518	0.27736	0.74693	0.29921	-0.245654	-0.00322397
0.75606	0.28651	0.75439	0.28306	0.75615	0.30519	-0.243643	-0.00366626
0.76519	0.29216	0.7635	0.28879	0.76528	0.3112	-0.241612	-0.0036076
0.77424	0.29785	0.77254	0.29455	0.77432	0.31725	-0.239524	-0.00394401
0.7832	0.30357	0.78149	0.30036	0.78328	0.32334	-0.237471	-0.00344518
0.79207	0.30932	0.79035	0.3062	0.79216	0.32946	-0.235438	-0.00347
0.80086	0.31511	0.79914	0.31208	0.80095	0.33561	-0.233476	-0.0037929
0.80958	0.32094	0.80785	0.318	0.80966	0.34181	-0.231375	-0.00326093
0.81821	0.3268	0.81648	0.32396	0.8183	0.34804	-0.229362	-0.00312577
0.82677	0.33269	0.82503	0.32996	0.82686	0.35431	-0.22742	-0.00344988
0.83525	0.33862	0.83351	0.336	0.83534	0.36062	-0.225308	-0.00370558
0.84366	0.34459	0.84191	0.34207	0.84375	0.36696	-0.223338	-0.00323901
0.852	0.35059	0.85024	0.34819	0.85209	0.37334	-0.221257	-0.00329901
0.86026	0.35663	0.85851	0.35435	0.86035	0.37977	-0.219302	-0.0033136
0.86846	0.3627	0.8667	0.36054	0.86854	0.38622	-0.217357	-0.0032878
0.87658	0.36881	0.87482	0.36678	0.87667	0.39272	-0.215192	-0.00331806
0.88464	0.37496	0.88288	0.37305	0.88473	0.39926	-0.21333	-0.00331224
0.89263	0.38115	0.89087	0.37937	0.89272	0.40584	-0.211352	-0.00319488
0.90055	0.38737	0.89879	0.38573	0.90064	0.41245	-0.209282	-0.00316888
0.90841	0.39363	0.90665	0.39212	0.9085	0.41911	-0.207386	-0.00306078
0.91621	0.39993	0.91445	0.39856	0.9163	0.4258	-0.205309	-0.00254369
0.92394	0.40626	0.92219	0.40504	0.92403	0.43254	-0.203436	-0.0033045
0.93161	0.41263	0.92986	0.41157	0.9317	0.43931	-0.201404	-0.00316551
0.93923	0.41904	0.93748	0.41813	0.93931	0.44613	-0.199383	-0.00329844
0.94678	0.42549	0.94504	0.42474	0.94687	0.45299	-0.197566	-0.00370442
0.95427	0.43198	0.95254	0.43138	0.95436	0.45988	-0.195531	-0.00317827
0.96171	0.4386	0.95998	0.43807	0.9618	0.46694	-0.193551	-0.00286709
0.96909	0.44527	0.96736	0.4448	0.96918	0.47403	-0.191649	-0.00311419
0.97642	0.45199	0.97469	0.45161	0.9765	0.48117	-0.189692	-0.00366349
0.98369	0.45874	0.98197	0.45853	0.9838	0.48835	-0.187775	-0.00295593
0.99095	0.46554	0.98919	0.4655	0.99107	0.49558	-0.185768	-0.00321006
0.99817	0.47238	0.99636	0.47251	0.99828	0.50285	-0.183858	-0.00306806
1.0053	0.47927	1.0035	0.47957	1.0054	0.51017	-0.181974	-0.00334927
1.0124	0.48619	1.0105	0.48667	1.0126	0.51753	-0.179985	-0.00292929
1.0195	0.49316	1.0176	0.49382	1.0196	0.52494	-0.178065	-0.00315361
1.0265	0.50017	1.0245	0.50102	1.0266	0.53239	-0.176141	-0.00341038
1.0335	0.50722	1.0315	0.50826	1.0336	0.53988	-0.174286	-0.00320395
1.0404	0.51431	1.0383	0.51554	1.0405	0.54742	-0.172291	-0.00346194
1.0472	0.52145	1.0452	0.52287	1.0474	0.55501	-0.170414	-0.00302724
1.0541	0.52862	1.0519	0.53025	1.0542	0.56263	-0.168563	-0.00291433
1.0608	0.53584	1.0587	0.53767	1.0609	0.57031	-0.166586	-0.00272153
1.0675	0.54311	1.0654	0.54514	1.0677	0.57803	-0.164727	-0.00275667
1.0742	0.55041	1.072	0.55265	1.0743	0.58579	-0.162786	-0.00328277
1.0808	0.55776	1.0786	0.56076	1.081	0.5936	-0.160927	-0.00307328
1.0874	0.56515	1.0852	0.56908	1.0875	0.60145	-0.159072	-0.00321097
						-0.157036	-0.00262003
						-0.155308	-0.00280554
						-0.153427	-0.00319118
						-0.151466	-0.00303905
						-0.14967	-0.00247529
						-0.147744	-0.00279759
						-0.145955	-0.00312625
						-0.144043	-0.00307598
						-0.142129	-0.00232311
						-0.140398	-0.0026363
						-0.138483	-0.00238259
						-0.136613	-0.00345829
						-0.134816	-0.00277161
						-0.13298	-0.00279685
						-0.131162	-0.00284416
						-0.129251	-0.00276495
						-0.127453	-0.00244766
						-0.125653	-0.0029097
						-0.123793	-0.00275243
						-0.121964	-0.00280564
						-0.120151	-0.0026809
						-0.118404	-0.00338637
						-0.116504	-0.00267028
						-0.11475	-0.00302017
						-0.112971	-0.00271544
						-0.111121	-0.00278601
						-0.109363	-0.00272164
						-0.107526	-0.00270226
						-0.105794	-0.00260357
						-0.103997	-0.00269131
						-0.102091	-0.00263786
						-0.100435	-0.00269166
						-0.0986411	-0.00250135
						-0.0968382	-0.00266358
						-0.0950977	-0.0028491
						-0.0933002	-0.00314973
						-0.0915995	-0.00279831
						-0.0897493	-0.00274426
						-0.0879816	-0.00217831
						-0.0863284	-0.0024048
						-0.084508	-0.00296684
						-0.0827557	-0.00249072
						-0.0810204	-0.00281165
						-0.0792942	-0.00223498
						-0.0775709	-0.0031722
						-0.0757725	-0.00328084
						-0.0740614	-0.00269025
						-0.0723541	-0.00262891
						-0.0706039	-0.00252064
						-0.0688309	-0.00296862
						-0.0671445	-0.00286044
						-0.0654807	-0.00328092
						-0.0636781	-0.00290223
						-0.0620013	-0.00279334
						-0.0603332	-0.00250089
						-0.0585655	-0.00305997
						-0.0569031	-0.00314641
						-0.0551474	-0.00250275
						-0.0535035	-0.00254687
						-0.0518241	-0.00265078
						-0.0500147	-0.0028687
						-0.0484424	-0.00245904
						-0.0467521	-0.00244354
						-0.0450082	-0.00208005
						-0.0433624	-0.00208182
						-0.0416303	-0.00222217
						-0.0400335	-0.00273066
						-0.038308	-0.00220812
						-0.0365913	-0.0016414
						-0.0350275	-0.0024242
						-0.0333222	-0.00231129
						-0.0316514	-0.00242902
						-0.0299776	-0.00163957
						-0.0283613	-0.00238492
						-0.0266995	-0.00164167
						-0.0250084	-0.00221817
						-0.0233819	-0.00112263
						-0.0217531	-0.00184138
						-0.0200769	-0.00183663
						-0.0184338	-0.00170861
						-0.0168065	-0.00135797
						-0.0152235	-0.0016738
						-0.0135101	-0.0012415
						-0.0119144	-0.00117366
						-0.0103277	-0.000894396
						-0.00865266	-0.001112
						-0.00705901	-0.000763171
						-0.00536434	-0.000319523
						-0.0038365	0.000156703
						-0.00220211	-0.000104437
						-0.00051001	-0.000109194
						0.00099838	0.000193723
						0.00263051	0.000963421
						0.00425437	0.000758605
						0.00582759	0.000439402
						0.00747024	0.00104883
						0.00898499	0.00155859
						0.0106463	0.0024002
						0.0122509	0.00168132
						0.013764	0.00238537
						0.0154055	0.00267775
						0.0169969	0.00252401
						0.0185392	0.00325836
						0.0201366	0.00308585
						0.0216733	0.00399009
						0.0233318	0.0044738
						0.0248518	0.00465585
						0.026411	0.0052189
						0.0280194	0.00578403
						0.0295737	0.00585923
						0.0311365	0.00601888
						0.0326392	0.00652228
						0.0342617	0.00663842
						0.0358001	0.00750237
						0.0373013	0.00803634
						0.0389047	0.00846847
						0.0404298	0.00899922
						0.0420166	0.00974823
						0.0434969	0.00860383
						0.0450219	0.0098922
						0.046676	0.010535
						0.0481034	0.0109532
						0.0496436	0.0111035
						0.0512213	0.0118097
						0.0526995	0.0122389
						0.0542784	0.0129224
						0.0557292	0.0126241
						0.0573148	0.0130312
						0.0588584	0.0134124
						0.0602852	0.0140796
						0.0618408	0.0144236
						0.0633774	0.0153634
						0.0648544	0.0153341
						0.0663525	0.0161299
						0.0678484	0.0159204
						0.0694036	0.0168953
						0.0708829	0.0172587
						0.072366	0.0175287
						0.0738694	0.0182932
						0.0753988	0.0182956
						0.0768641	0.0187645
						0.078316	0.0188475
						0.0798773	0.0200071
						0.0813138	0.0197785
						0.0827816	0.0201772
						0.0842856	0.0206461
						0.085749	0.0213959
						0.0872715	0.0225053
						0.0886915	0.021407
						0.0901815	0.0224845
						0.0917083	0.023112
						0.0930839	0.0236756
						0.0945674	0.0237398
						0.0960597	0.0241637
						0.0974892	0.0243242
						0.0989939	0.0249167
						0.100386	0.0252166
						0.101892	0.0254576
						0.103368	0.0258656
						0.104717	0.0268427
						0.106232	0.026501
						0.107685	0.0268486
						0.10911	0.0272173
						0.110553	0.0286601
						0.111974	0.0288005
						0.113472	0.0292319
						0.114883	0.0292534
						0.116281	0.0293804
						0.117752	0.0305407
						0.119204	0.0303603
						0.120602	0.0317566
						0.121997	0.0312067
						0.12347	0.0321773
						0.124861	0.0331195
						0.126256	0.032982
						0.127717	0.0334168
						0.129108	0.0336504
						0.130555	0.0334145
						0.131926	0.0349298
						0.133332	0.0348441
						0.134831	0.035573
						0.136138	0.0352829
						0.137543	0.0363278
						0.138994	0.03662
						0.140348	0.0381226
						0.141805	0.0381073
						0.143129	0.0384416
						0.144556	0.0385341
						0.145996	0.0392521
						0.147294	0.0382644
						0.148736	0.0392897
						0.150134	0.0407317
						0.151483	0.0405106
						0.152867	0.0405827
						0.154239	0.0415625
						0.155665	0.0414032
						0.157023	0.0422319
						0.158373	0.0426066
						0.159768	0.0427337
						0.16115	0.0439003
						0.162496	0.0442856
						0.163834	0.044923
						0.165262	0.0444037
						0.166592	0.0449312
						0.167929	0.0450075
						0.169331	0.0452951
						0.17066	0.0462053
						0.172064	0.0462642
						0.173368	0.0481696
						0.174702	0.0481829
						0.176165	0.0476861
						0.177409	0.0492981
						0.178753	0.0489755
						0.180155	0.049752
						0.181444	0.050412
						0.182848	0.0506575
						0.184124	0.0502029
						0.185499	0.0512102
						0.186871	0.0521218
						0.188117	0.0524228
						0.189501	0.0520493
						0.190843	0.0523864
						0.192154	0.0527758
						0.193468	0.0536767
						0.194785	0.054458
						0.196155	0.0547937
						0.197453	0.0555314
						0.198756	0.0551227
						0.200095	0.056026
						0.201434	0.0561484
						0.20272	0.0560375
						0.204	0.0580117
						0.205372	0.0576765
						0.206645	0.0588471
						0.20794	0.0588164
						0.209282	0.0589819
						0.210554	0.0594921
						0.211898	0.0606363
						0.213161	0.0602015
						0.214438	0.0603497
						0.215845	0.062243
						0.217041	0.0617027
						0.218356	0.0619335
						0.219684	0.0627521
						0.220928	0.0632699
						0.222263	0.0635674
						0.223489	0.0635603
						0.224826	0.0638824
						0.226131	0.0641796
						0.227348	0.0655274
						0.228674	0.0657971
						0.229951	0.0658825
						0.23122	0.0662047
						0.232475	0.0659248
						0.23377	0.0674071
						0.235049	0.068241
						0.236318	0.0682732
						0.237575	0.0688061
						0.238845	0.0690941
						0.24016	0.0695614
						0.24137	0.069495
						0.242625	0.0701836
						0.243936	0.0697322
						0.245165	0.0708137
						0.246406	0.0707905
						0.247688	0.0716464
						0.248917	0.0715506
						0.250229	0.0721778
						0.251436	0.0726133
						0.252679	0.072818
						0.254	0.0731745
						0.255156	0.0743701
						0.256441	0.0738667
						0.25771	0.0743517
						0.258903	0.0749214
						0.260207	0.0755333
						0.261374	0.075207
						0.262651	0.0751003
						0.263922	0.0761042
						0.26508	0.0757926
						0.266371	0.0766701
						0.2676	0.0759618
						0.268809	0.077451
						0.270036	0.0774075
						0.271246	0.0778647
						0.27252	0.077652
						0.273719	0.0784478
						0.27493	0.0788911
						0.276176	0.0784612
						0.277407	0.0796856
						0.278627	0.0803066
						0.279791	0.0805425
						0.281068	0.0808046
						0.282243	0.0811421
						0.283443	0.0814908
						0.284697	0.0823786
						0.285872	0.0825267
						0.287132	0.0827575
						0.28829	0.0824024
						0.289489	0.0820497
						0.290775	0.0833822
						0.291885	0.0830893
						0.29311	0.0838403
						0.294334	0.0844328
						0.295502	0.0852159
						0.29675	0.0853995
						0.297875	0.0850741
						0.299106	0.0865175
						0.300332	0.0870656
						0.301448	0.0872064
						0.302689	0.087095
						0.303874	0.088067
						0.30504	0.0883327
						0.306223	0.0881656
						0.307409	0.0886214
						0.308615	0.0887466
						0.309789	0.089468
						0.310953	0.089068
						0.312155	0.0899911
						0.313347	0.0905976
						0.314502	0.0918725
						0.315642	0.0908167
						0.316874	0.0912228
						0.318016	0.0922771
						0.319153	0.0921242
						0.320363	0.0920553
						0.321505	0.0937891
						0.322717	0.0930633
						0.323835	0.0946957
						0.324996	0.0941553
						0.326242	0.0949611
						0.327308	0.0950112
						0.328487	0.0953423
						0.329677	0.0950992
						0.330791	0.0963335
						0.331996	0.0970632
						0.333091	0.0975472
						0.334293	0.0969905
						0.335454	0.0975784
						0.336545	0.0977564
						0.337738	0.0985605
						0.338883	0.0981813
						0.340013	0.0995809
						0.341159	0.0992548
						0.342287	0.100137
						0.343474	0.101337
						0.344594	0.101035
						0.345714	0.101371
						0.346875	0.101232
						0.348018	0.102212
						0.349151	0.102213
						0.350257	0.102398
						0.351438	0.102851
						0.352529	0.102937
						0.353657	0.104395
						0.3548	0.103827
						0.355925	0.104536
						0.357087	0.105134
						0.358164	0.105742
						0.359293	0.105495
						0.360473	0.105863
						0.361524	0.106381
						0.362663	0.106675
						0.363796	0.107754
						0.36489	0.107123
						0.366046	0.108877
						0.367112	0.108133
						0.368274	0.108714
						0.369384	0.108936
						0.37046	0.108999
						0.37158	0.110069
						0.372711	0.110723
						0.373804	0.11122
						0.374904	0.110686
						0.376019	0.112346
						0.377133	0.11207
						0.378225	0.111369
						0.379308	0.111692
						0.380435	0.113334
						0.381548	0.112745
						0.382627	0.113714
						0.3837	0.114639
						0.384843	0.114937
						0.385915	0.115717
						0.386981	0.114196
						0.388107	0.115991
						0.389191	0.116368
						0.390299	0.116239
						0.391361	0.116735
						0.392433	0.117558
						0.393603	0.118794
						0.394607	0.11858
						0.395693	0.118458
						0.396814	0.119581
						0.39786	0.119324
						0.398974	0.119262
						0.40001	0.120126
						0.401123	0.121124
						0.402229	0.120724
						0.40323	0.120273
						0.404354	0.121801
						0.405433	0.122122
						0.406486	0.122921
						0.407551	0.122798
						0.40861	0.12359
						0.409717	0.123728
						0.41077	0.123869
						0.41181	0.124435
						0.412917	0.124555
						0.41399	0.126019
						0.415027	0.126674
						0.416062	0.125997
						0.417168	0.126538
						0.41821	0.127414
						0.419242	0.12812
						0.420333	0.127983
						0.421375	0.127994
						0.422451	0.128851
						0.423483	0.128352
						0.424526	0.129408
						0.425646	0.130486
						0.426624	0.131769
						0.427683	0.131197
						0.428764	0.131523
						0.429786	0.131147
						0.430853	0.132882
						0.431861	0.132485
						0.432946	0.132504
						0.433994	0.132489
						0.434998	0.133797
						0.436057	0.133522
						0.43711	0.13516
						0.438138	0.135067
						0.439162	0.136287
						0.4402	0.135777
						0.441256	0.136263
						0.442292	0.136415
						0.443304	0.136916
						0.444361	0.137776
						0.445394	0.137136
						0.446414	0.138944
						0.447417	0.138604
						0.448482	0.139381
						0.449506	0.140863
						0.450495	0.139703
						0.451552	0.140838
						0.452566	0.141406
						0.45361	0.142128
						0.454602	0.142112
						0.455613	0.141485
						0.456714	0.143415
						0.45765	0.143789
						0.458681	0.144335
						0.459729	0.144865
						0.460712	0.14486
						0.461759	0.145799
						0.46272	0.145621
						0.463776	0.145547
						0.464804	0.146237
						0.465763	0.146458
						0.466796	0.148132
						0.467821	0.147493
						0.468811	0.147059
						0.469812	0.14797
						0.470807	0.149897
						0.47185	0.15087
						0.472833	0.150062
						0.473825	0.149386
						0.474839	0.150446
						0.475852	0.151671
						0.476838	0.151346
						0.477811	0.151656
						0.478866	0.153276
						0.47983	0.153932
						0.480801	0.152885
						0.481827	0.153195
						0.48281	0.154425
						0.48383	0.154879
						0.484782	0.155476
						0.485777	0.156346
						0.48682	0.155867
						0.487747	0.156452
						0.488747	0.156497
						0.489753	0.157751
						0.490714	0.157924
						0.49173	0.158886
						0.49267	0.159458
						0.493692	0.159838
						0.494678	0.159708
						0.49562	0.160025
						0.496627	0.161755
						0.497607	0.16114
						0.498575	0.161369
						0.499539	0.162819
						0.50052	0.161944
						0.501518	0.163454
						0.502475	0.164649
						0.503431	0.165015
						0.504434	0.165358
						0.505414	0.165074
						0.506374	0.166473
						0.507316	0.165234
						0.508326	0.166038
						0.509276	0.167848
						0.510212	0.168351
						0.511218	0.168082
						0.512166	0.169939
						0.513153	0.169374
						0.514081	0.170267
						0.515044	0.170032
						0.516067	0.170923
						0.51696	0.17056
						0.517924	0.171579
						0.518916	0.172415
						0.519839	0.172385
						0.520829	0.172546
						0.521739	0.173021
						0.522734	0.173724
						0.523707	0.174159
						0.524601	0.174962
						0.525586	0.175051
						0.526545	0.176028
						0.527475	0.175501
						0.528422	0.176307
						0.529361	0.1769
						0.530337	0.178247
						0.531275	0.177593
						0.532207	0.177663
						0.533171	0.178927
						0.534127	0.179666
						0.535053	0.180091
						0.535968	0.178669
						0.536963	0.180104
						0.537862	0.181267
						0.53881	0.182494
						0.53975	0.182332
						0.540674	0.18233
						0.541658	0.183276
						0.542546	0.184843
						0.543482	0.184239
						0.54447	0.184552
						0.545345	0.185191
						0.546292	0.18618
						0.547236	0.186292
						0.548143	0.185887
						0.549109	0.186719
						0.549986	0.186928
						0.550964	0.187144
						0.551896	0.188039
						0.552775	0.188696
						0.553733	0.190079
						0.554655	0.190397
						0.55557	0.190901
						0.55648	0.190342
						0.55741	0.191013
						0.558357	0.190635
						0.559251	0.191762
						0.560164	0.191916
						0.561095	0.19192
						0.562031	0.193301
						0.562939	0.193224
						0.563825	0.194245
						0.56479	0.194147
						0.565671	0.195004
						0.566572	0.194793
						0.567517	0.195023
						0.568409	0.195574
						0.569356	0.196859
						0.570219	0.197451
						0.57113	0.198332
						0.572094	0.198246
						0.572939	0.200084
						0.573864	0.199513
						0.574785	0.199943
						0.575671	0.2003
						0.5766	0.200911
						0.577461	0.202785
						0.578403	0.201902
						0.579326	0.202392
						0.580171	0.203091
						0.58111	0.204102
						0.582004	0.204409
						0.582897	0.20466
						0.583786	0.205395
						0.584675	0.20551
						0.585602	0.206705
						0.586479	0.206414
						0.587371	0.206204
						0.58827	0.207814
						0.589185	0.208254
						0.590054	0.20847
						0.590934	0.20938
						0.591873	0.208386
						0.592721	0.208859
						0.593618	0.211172
						0.594497	0.209858
						0.595389	0.210854
						0.596317	0.211962
						0.597151	0.213543
						0.598045	0.213278
						0.59897	0.212928
						0.599802	0.21457
						0.600695	0.215415
						0.601599	0.215347
						0.602455	0.215716
						0.60337	0.216178
						0.604201	0.216381
						0.605114	0.217879
						0.606014	0.218076
						0.606833	0.216966
						0.607757	0.218919
						0.608621	0.219824
						0.609488	0.218954
						0.610363	0.220776
						0.611222	0.221024
						0.612132	0.221492
						0.612985	0.221404
						0.613851	0.221272
						0.61473	0.222895
						0.615617	0.223489
						0.616478	0.224577
						0.617311	0.223532
						0.618225	0.223796
						0.619074	0.22542
						0.619909	0.225189
						0.620817	0.226318
						0.62166	0.226135
						0.622558	0.227345
						0.623387	0.227347
						0.624234	0.228349
						0.625165	0.229665
						0.625959	0.230341
						0.62683	0.229873
						0.627716	0.23049
						0.628544	0.231682
						0.629441	0.232326
						0.630248	0.232302
						0.631131	0.232426
						0.632011	0.233434
						0.632812	0.232535
						0.633706	0.234932
						0.634564	0.235218
						0.635386	0.235661
						0.636249	0.235817
						0.637085	0.23579
						0.637976	0.236999
						0.638807	0.237411
						0.639639	0.238157
						0.64051	0.237829
						0.641363	0.238176
						0.642207	0.241289
						0.643033	0.238803
						0.643895	0.24122
						0.644735	0.24024
						0.645561	0.241492
						0.646431	0.241488
						0.647262	0.243032
						0.648124	0.242847
						0.648938	0.243454
						0.649774	0.244499
						0.650671	0.24472
						0.651452	0.244358
						0.652288	0.244647
						0.653162	0.246466
						0.653966	0.248307
						0.654844	0.247644
						0.655634	0.248324
						0.656495	0.248043
						0.657349	0.247795
						0.658131	0.248305
						0.658993	0.249211
						0.659829	0.248996
						0.660646	0.249601
						0.661485	0.250115
						0.6623	0.250174
						0.663155	0.251961
						0.663976	0.25329
						0.66479	0.254009
						0.665637	0.255435
						0.666465	0.254571
						0.667292	0.255749
						0.668087	0.255427
						0.668944	0.256603
						0.66976	0.256139
						0.670563	0.257621
						0.671411	0.257325
						0.672219	0.259083
						0.673066	0.258429
						0.673863	0.259954
						0.674672	0.259561
						0.675544	0.26006
						0.676312	0.261124
						0.677128	0.26035
						0.67798	0.261958
						0.67877	0.262586
						0.679602	0.264217
						0.680394	0.262779
						0.681234	0.264167
						0.682049	0.265736
						0.682833	0.265697
						0.683656	0.26563
						0.684484	0.266175
						0.685284	0.265903
						0.68609	0.268187
						0.686895	0.268292
						0.687726	0.268653
						0.68853	0.26972
						0.689327	0.269685
						0.690135	0.271193
						0.690967	0.271533
						0.691753	0.271233
						0.692551	0.270773
						0.693378	0.272178
						0.694168	0.273412
						0.694951	0.274193
						0.695782	0.273339
						0.69657	0.274261
						0.697394	0.275874
						0.698169	0.277098
						0.698967	0.275249
						0.699816	0.277443
						0.700559	0.276689
						0.70137	0.278445
						0.702187	0.279307
						0.702955	0.279446
						0.703786	0.280047
						0.704547	0.281239
						0.705367	0.281852
						0.70618	0.282794
						0.706921	0.282826
						0.707749	0.283291
						0.708542	0.28386
						0.709315	0.284808
						0.710116	0.28482
						0.710893	0.283981
						0.711714	0.28607
						0.712487	0.285959
						0.71327	0.287196
						0.714069	0.286772
						0.714866	0.289324
						0.715643	0.289472
						0.716409	0.289682
						0.717229	0.290036
						0.717997	0.291379
						0.718759	0.292092
						0.719577	0.292538
						0.720343	0.293047
						0.721153	0.292949
						0.721904	0.294604
						0.722681	0.295028
						0.723513	0.295313
						0.724238	0.295787
						0.725028	0.295283
						0.725825	0.297672
						0.726582	0.297963
						0.727387	0.298515
						0.728133	0.299012
						0.728931	0.299252
						0.729723	0.299932
						0.730458	0.29932
						0.731257	0.302403
						0.732036	0.303865
						0.732798	0.302309
						0.733564	0.304031
						0.734343	0.3044
						0.735119	0.305645
						0.735894	0.305044
						0.736654	0.306706
						0.737428	0.306052
						0.738228	0.306599
						0.738966	0.308745
						0.739712	0.308464
						0.740518	0.310095
						0.741275	0.310001
						0.742019	0.311235
						0.742815	0.310797
						0.743561	0.312364
						0.744347	0.314763
						0.745095	0.313056
						0.745848	0.314126
						0.746664	0.315999
						0.747373	0.314435
						0.748144	0.317012
						0.748926	0.315018
						0.749654	0.317121
						0.750449	0.317534
						0.75117	0.318375
						0.751958	0.319892
						0.752729	0.320286
						0.753445	0.320543
						0.754232	0.322557
						0.754986	0.321466
						0.755735	0.323031
						0.756483	0.323955
						0.757236	0.32345
						0.758023	0.325059
						0.758755	0.324801
						0.759501	0.325299
						0.760266	0.325549
						0.76103	0.327317
						0.761769	0.327062
						0.762498	0.329171
						0.763286	0.328503
						0.764014	0.330009
						0.764759	0.330768
						0.765517	0.332181
						0.766258	0.331523
						0.767029	0.332144
						0.767746	0.332234
						0.768496	0.334203
						0.769285	0.334495
						0.769984	0.33412
						0.770733	0.33532
						0.771494	0.336337
						0.77222	0.338144
						0.772983	0.337234
						0.773694	0.339488
						0.77447	0.340351
						0.775215	0.339992
						0.775921	0.341215
						0.776687	0.341518
						0.777425	0.342877
						0.778163	0.342133
						0.778883	0.342969
						0.779631	0.343951
						0.780381	0.344662
						0.78111	0.344901
						0.781837	0.344988
						0.78258	0.346672
						0.783338	0.346977
						0.784055	0.348547
						0.784771	0.349072
						0.785539	0.350319
						0.786248	0.349617
						0.786971	0.351484
						0.787734	0.352139
						0.788445	0.352929
						0.789202	0.352741
						0.789909	0.352936
						0.790632	0.356222
						0.791409	0.356639
						0.792084	0.355536
						0.79283	0.35669
						0.793575	0.358858
						0.794274	0.359276
						0.795035	0.35955
						0.795718	0.35924
						0.796475	0.36039
						0.79721	0.361115
						0.797892	0.362185
						0.798653	0.362419
						0.799375	0.363547
						0.800085	0.364379
						0.800806	0.366292
						0.801521	0.365044
						0.802268	0.366816
						0.802985	0.366547
						0.803688	0.368866
						0.804428	0.368453
						0.805148	0.369618
						0.80586	0.37102
						0.806558	0.370633
						0.807307	0.371572
						0.808012	0.371229
						0.808714	0.372914
						0.80945	0.372245
						0.810159	0.372665
						0.810897	0.374691
						0.811573	0.374847
						0.812299	0.377905
						0.813051	0.378035
						0.81372	0.377566
						0.814439	0.377655
						0.815172	0.378527
						0.81586	0.378236
						0.816599	0.379325
						0.817274	0.379156
						0.818017	0.382752
						0.818734	0.381647
						0.819399	0.383767
						0.820135	0.382625
						0.820844	0.383653
						0.821545	0.384265
						0.822253	0.384995
						0.822956	0.38531
						0.823685	0.385319
						0.824376	0.387447
						0.825074	0.387289
						0.825796	0.389605
						0.826504	0.389437
						0.827201	0.390972
						0.827884	0.39292
						0.828619	0.389214
						0.829296	0.392772
						0.829989	0.393218
						0.830715	0.392769
						0.831401	0.394942
						0.832131	0.39477
						0.832798	0.396622
						0.833493	0.396595
						0.83424	0.39906
						0.83489	0.39893
						0.835597	0.399908
						0.836308	0.401381
						0.836996	0.401005
						0.837711	0.401699
						0.838369	0.400237
						0.839095	0.403346
						0.839801	0.40526
						0.840455	0.405089
						0.841179	0.405034
						0.841871	0.406946
						0.842554	0.407429
						0.843248	0.410323
						0.843926	0.408763
						0.844652	0.40741
						0.845328	0.409528
						0.846007	0.412498
						0.846709	0.411896
						0.847407	0.412946
						0.848095	0.414814
						0.848759	0.41462
						0.849482	0.415244
						0.850153	0.416228
						0.850826	0.416156
						0.851536	0.417747
						0.852206	0.418778
						0.852921	0.419285
						0.853574	0.417025
						0.854271	0.419366
						0.854982	0.419724
						0.855623	0.420422
						0.856318	0.424439
						0.857008	0.424052
						0.857689	0.423439
						0.85838	0.424858
						0.859037	0.425804
						0.859744	0.427382
						0.860436	0.427218
						0.861074	0.427581
						0.861781	0.428285
						0.862461	0.430109
						0.863136	0.430459
						0.863808	0.430436
						0.864474	0.433689
						0.865188	0.432553
						0.865844	0.4333
						0.866514	0.434875
						0.867201	0.434263
						0.867883	0.437102
						0.868557	0.436125
						0.86921	0.438177
						0.869911	0.438111
						0.870578	0.440278
						0.871235	0.442067
						0.871936	0.442829
						0.872587	0.442397
						0.873278	0.439321
						0.873925	0.443893
						0.874593	0.443151
						0.875317	0.445251
						0.875938	0.445769
						0.876614	0.446765
						0.877304	0.448674
						0.877952	0.448708
						0.878642	0.446873
						0.879278	0.449562
						0.879967	0.450175
						0.880655	0.452333
						0.881275	0.452644
						0.881972	0.45293
						0.882641	0.45325
						0.883293	0.45429
						0.883961	0.455353
						0.884612	0.455742
						0.885304	0.456667
						0.885956	0.457924
						0.886613	0.458942
						0.887287	0.459419
						0.887948	0.461462
						0.888611	0.461784
						0.889256	0.463488
						0.889935	0.464873
						0.890594	0.465211
						0.891231	0.465554
						0.891918	0.466901
						0.892561	0.467615
						0.893246	0.467139
						0.893883	0.469018
						0.894527	0.470288
						0.89523	0.469544
						0.895846	0.471586
						0.896509	0.47333
						0.897178	0.472139
						0.89782	0.473645
						0.898498	0.47483
						0.899122	0.475343
						0.89979	0.474982
						0.900467	0.475768
						0.901083	0.476386
						0.901764	0.479155
						0.902418	0.479035
						0.903059	0.480706
						0.903707	0.481777
						0.904354	0.482803
						0.905031	0.482712
						0.905663	0.482567
						0.906307	0.485256
						0.90697	0.485267
						0.907628	0.486505
						0.908273	0.486213
						0.908898	0.486813
						0.909571	0.489511
						0.910213	0.488282
						0.910844	0.49076
						0.911506	0.491929
						0.912146	0.492354
						0.912813	0.493136
						0.913433	0.494491
						0.914074	0.49567
						0.914759	0.495775
						0.915363	0.497533
						0.91601	0.496789
						0.916677	0.499021
						0.917299	0.500007
						0.917971	0.499936
						0.918581	0.502569
						0.919246	0.501645
						0.919893	0.504364
						0.920501	0.504718
						0.921169	0.504773
						0.921808	0.506295
						0.922439	0.507326
						0.92307	0.507883
						0.923712	0.509712
						0.924366	0.510094
						0.924996	0.510067
						0.925625	0.509835
						0.92627	0.511765
						0.926925	0.51356
						0.927548	0.513357
						0.928162	0.515213
						0.928841	0.515993
						0.929447	0.517117
						0.930085	0.516461
						0.930723	0.518383
						0.931356	0.519333
						0.932011	0.519181
						0.932615	0.520723
						0.933249	0.52182
						0.933918	0.524373
						0.934508	0.523661
						0.935153	0.524335
						0.935797	0.525138
						0.93641	0.525764
						0.93706	0.526251
						0.937663	0.528557
						0.93831	0.528082
						0.938962	0.530016
						0.93955	0.529509
						0.9402	0.531139
						0.940827	0.531489
						0.941449	0.532351
						0.942072	0.534181
						0.942698	0.536192
						0.943344	0.53604
						0.94396	0.536661
						0.944579	0.538947
						0.945215	0.538644
						0.945846	0.537369
						0.946469	0.538804
						0.947068	0.538496
						0.947719	0.542604
						0.948334	0.542161
						0.948942	0.543269
						0.949584	0.544398
						0.950198	0.54483
						0.950837	0.54617
						0.951441	0.547167
						0.952058	0.546968
						0.952717	0.550015
						0.953292	0.549045
						0.953929	0.550601
						0.954559	0.549987
						0.955158	0.549322
						0.955797	0.552106
						0.956386	0.55333
						0.95703	0.554129
						0.957661	0.554626
						0.958239	0.555373
						0.958876	0.555236
						0.9595	0.556616
						0.960111	0.559514
						0.960718	0.55764
						0.961332	0.560149
						0.961962	0.560897
						0.962575	0.56162
						0.963181	0.563013
						0.963801	0.563939
						0.964431	0.563702
						0.965024	0.564697
						0.965627	0.565103
						0.966272	0.395137
						0.96686	-0.00360781
						0.967468	-0.000917424
						0.968089	-0.000669492
						0.968692	-0.00136378
						0.969326	-0.00156256
						0.96991	-0.000221891
						0.970518	-0.00242464
						0.97117	-0.00242557
						0.971736	-0.00302347
						0.972346	-0.00187958
						0.972982	-0.000551625
						0.973559	-0.00179757
						0.974197	-0.00247977
						0.974771	-0.00124954
						0.975397	-0.00234838
						0.97602	-0.000233778
						0.976587	-0.00116666
						0.977216	-0.000299569
						0.977827	-0.00206798
						0.978423	-0.00200182
						0.979025	-0.00235328
						0.979621	-0.0015851
						0.980248	-0.00280658
						0.980843	-0.0018034
						0.981441	-0.00150243
						0.982049	-0.0017541
						0.982657	-0.00289477
						0.983257	-0.00274491
						0.983842	-0.0012686
						0.984469	-0.00274703
						0.985057	-0.00212615
						0.985643	-0.00343862
						0.986267	-0.0020602
						0.986832	-0.00334049

## Sheet: Q tensile
Q1	sim	Q2	sim	Q3	sim	Q	meas
strain	stress	strain	stress	strain	stress	strain	stress
0	0	0	0	0	0	0	0
0.021675	0.018074	0.021675	0.019567	0.021675	0.017465	-0.098097	-0.0147693
0.04254	0.035014	0.04254	0.037912	0.042539	0.033824	-0.0961313	-0.0151643
0.062634	0.050928	0.062635	0.055154	0.062632	0.049183	-0.0943465	-0.0143296
0.081995	0.065914	0.081998	0.071395	0.081991	0.063637	-0.0924382	-0.0140657
0.10066	0.080057	0.10067	0.086728	0.10066	0.07727	-0.0904335	-0.0132928
0.11867	0.093433	0.11868	0.10124	0.11866	0.090155	-0.088688	-0.0132776
0.13607	0.10644	0.13608	0.11534	0.13604	0.10267	-0.0867614	-0.0134094
0.15287	0.11885	0.15289	0.12882	0.15284	0.11462	-0.0848534	-0.0130002
0.16912	0.13072	0.16915	0.14171	0.16908	0.12603	-0.0830258	-0.0131384
0.18485	0.14209	0.18488	0.15406	0.1848	0.13695	-0.0811035	-0.0128569
0.20009	0.15299	0.20013	0.1659	0.20002	0.14741	-0.0793033	-0.0128097
0.21625	0.16345	0.21622	0.17727	0.21629	0.15745	-0.0773611	-0.012824
0.23225	0.17351	0.23221	0.18821	0.2323	0.1671	-0.0754904	-0.0121616
0.24798	0.18319	0.24795	0.19874	0.24804	0.17638	-0.0736948	-0.0126978
0.26346	0.19252	0.26342	0.2089	0.26352	0.18532	-0.071831	-0.0119517
0.27869	0.20153	0.27865	0.2187	0.27876	0.19394	-0.0699439	-0.0124706
0.29369	0.21023	0.29364	0.22818	0.29379	0.20226	-0.0681166	-0.0119278
0.30849	0.21865	0.30843	0.23736	0.3086	0.21031	-0.0663396	-0.0115714
0.32307	0.22681	0.323	0.24625	0.32318	0.2181	-0.0644417	-0.0108929
0.33743	0.23616	0.33735	0.25635	0.33755	0.22715	-0.0625895	-0.0109167
0.35157	0.2475	0.35149	0.26869	0.35171	0.23801	-0.0607949	-0.0112687
0.36551	0.25884	0.36543	0.28104	0.36566	0.24888	-0.0589495	-0.0110534
0.37926	0.27019	0.37917	0.2934	0.37941	0.25974	-0.0571275	-0.0106983
0.39281	0.28156	0.39271	0.30578	0.39296	0.27061	-0.0552679	-0.0111529
0.40617	0.29294	0.40607	0.31817	0.40633	0.2815	-0.0534936	-0.0105048
0.41934	0.30434	0.41924	0.33059	0.41952	0.2924	-0.0517088	-0.0104968
0.43234	0.31576	0.43223	0.34303	0.43252	0.30332	-0.0497705	-0.0101503
0.44517	0.32721	0.44505	0.3555	0.44535	0.31427	-0.0480538	-0.0102122
0.45782	0.33869	0.45771	0.36801	0.45802	0.32523	-0.0462715	-0.00970482
0.47031	0.35019	0.47019	0.38055	0.47051	0.33623	-0.0444049	-0.00952835
0.48264	0.36174	0.48252	0.39313	0.48285	0.34725	-0.0426498	-0.00813237
0.49481	0.37332	0.49469	0.40576	0.49503	0.35831	-0.0407567	-0.00879456
0.50683	0.38493	0.5067	0.41842	0.50706	0.3694	-0.0390751	-0.00930587
0.5187	0.39659	0.51857	0.43114	0.51893	0.38053	-0.0372488	-0.00941807
0.53043	0.4083	0.53029	0.4439	0.53067	0.3917	-0.0353784	-0.00834733
0.54201	0.42005	0.54187	0.45671	0.54225	0.40291	-0.0337326	-0.0076046
0.55346	0.43184	0.55331	0.46958	0.55371	0.41416	-0.0318893	-0.00839544
0.56477	0.44369	0.56462	0.4825	0.56502	0.42546	-0.0301098	-0.00779224
0.57594	0.45558	0.57579	0.49548	0.5762	0.4368	-0.0283529	-0.00752564
0.58699	0.46753	0.58683	0.50852	0.58725	0.44819	-0.0265522	-0.00672295
0.59791	0.47953	0.59775	0.52161	0.59818	0.45963	-0.0248545	-0.00614046
0.60871	0.49159	0.60854	0.53477	0.60898	0.47112	-0.0229949	-0.00637271
0.61938	0.5037	0.61922	0.54799	0.61966	0.48266	-0.0212434	-0.00619366
0.62994	0.51587	0.62977	0.56128	0.63022	0.49425	-0.0195416	-0.00596847
0.64038	0.5281	0.64021	0.57463	0.64067	0.5059	-0.0177505	-0.00570223
0.65071	0.54039	0.65053	0.58804	0.651	0.51761	-0.0159758	-0.00515837
0.66092	0.55274	0.66075	0.60153	0.66122	0.52937	-0.0142374	-0.00466581
0.67103	0.56515	0.67086	0.61508	0.67133	0.54119	-0.0125405	-0.00395373
0.68104	0.57763	0.68086	0.62871	0.68134	0.55306	-0.010775	-0.00329809
0.69093	0.59017	0.69075	0.6424	0.69124	0.565	-0.00900648	-0.0030185
0.70073	0.60277	0.70055	0.65617	0.70104	0.577	-0.0073123	-0.00255269
0.71043	0.61544	0.71024	0.67001	0.71074	0.58905	-0.00554906	-0.00115856
0.72003	0.62818	0.71984	0.68393	0.72034	0.60117	-0.0038417	-0.000534403
0.72953	0.64099	0.72934	0.69792	0.72985	0.61335	-0.00205865	0.000500731
0.73894	0.65386	0.73875	0.71199	0.73926	0.6256	-0.000370159	0.000239019
0.74825	0.6668	0.74806	0.72613	0.74857	0.63791	0.00130344	0.00145164
0.75748	0.67982	0.75729	0.74035	0.7578	0.65028	0.0031538	0.00163665
0.76662	0.6929	0.76642	0.75465	0.76694	0.66272	0.00477006	0.00304322
0.77567	0.70606	0.77547	0.76903	0.77599	0.67523	0.0064856	0.00415285
0.78463	0.71928	0.78444	0.78349	0.78496	0.6878	0.0082435	0.00374757
0.79351	0.73258	0.79332	0.79803	0.79384	0.70044	0.00989593	0.0053615
0.80231	0.74596	0.80212	0.81265	0.80264	0.71315	0.0116862	0.00623152
0.81103	0.7594	0.81083	0.82735	0.81136	0.72593	0.0132947	0.00644897
0.81967	0.77293	0.81947	0.84213	0.82	0.73878	0.0150279	0.00829482
0.82823	0.78652	0.82803	0.857	0.82857	0.75169	0.0167963	0.0086017
0.83672	0.8002	0.83652	0.87195	0.83705	0.76468	0.018378	0.0101468
0.84513	0.81394	0.84493	0.88698	0.84547	0.77773	0.0201151	0.0110106
0.85347	0.82777	0.85327	0.9021	0.8538	0.79086	0.0217919	0.011773
0.86173	0.84167	0.86153	0.91731	0.86207	0.80406	0.0234853	0.013039
0.86993	0.85565	0.86973	0.9326	0.87026	0.81733	0.0251631	0.0141988
0.87805	0.86971	0.87785	0.94798	0.87839	0.83068	0.0268198	0.0153343
0.88611	0.88384	0.88591	0.96344	0.88644	0.8441	0.0285356	0.015662
0.8941	0.89806	0.8939	0.97899	0.89443	0.85759	0.0302176	0.0171081
0.90202	0.91235	0.90182	0.99463	0.90236	0.87115	0.0318658	0.017901
0.90988	0.92673	0.90968	1.0104	0.91026	0.88479	0.0335106	0.0194443
0.91767	0.94118	0.91747	1.0262	0.91811	0.89851	0.0352408	0.0204684
0.92545	0.95572	0.92521	1.0421	0.92591	0.9123	0.0368617	0.0213321
0.93318	0.97033	0.93292	1.0581	0.93364	0.92619	0.0384858	0.022484
0.94085	0.98516	0.94059	1.0742	0.94131	0.94038	0.040195	0.0234336
0.94846	1.0002	0.9482	1.0906	0.94891	0.95464	0.0418451	0.025285
0.95601	1.0153	0.95574	1.1072	0.95646	0.96899	0.0434735	0.0258194
0.9635	1.0305	0.96324	1.1238	0.96395	0.98343	0.0451248	0.0285286
0.97093	1.0458	0.97067	1.1406	0.97138	0.99795	0.0467544	0.0285645
0.97831	1.0612	0.97804	1.1574	0.97876	1.0125	0.0484611	0.0284069
0.98563	1.0767	0.98537	1.1744	0.98608	1.0272	0.0500795	0.030118
0.99289	1.0923	0.99263	1.1914	0.99334	1.042	0.0516521	0.0328057
1.0001	1.108	0.99984	1.2086	1.0005	1.0569	0.0533937	0.0342597
1.0073	1.1237	1.007	1.2258	1.0077	1.0718	0.0549365	0.0340244
1.0144	1.1396	1.0141	1.2432	1.0148	1.0868	0.0565804	0.0343247
1.0214	1.1555	1.0212	1.2606	1.0219	1.1019	0.0582582	0.0351957
1.0284	1.1715	1.0282	1.2782	1.0289	1.1171	0.0598243	0.0376636
1.0354	1.1877	1.0351	1.2958	1.0358	1.1324	0.061534	0.0387937
1.0423	1.2039	1.042	1.3136	1.0427	1.1478	0.0630522	0.0397957
1.0491	1.2202	1.0489	1.3314	1.0496	1.1632	0.0646892	0.0410645
1.0559	1.2366	1.0557	1.3494	1.0564	1.1788	0.0664083	0.0420271
1.0627	1.2531	1.0624	1.3674	1.0631	1.1944	0.067895	0.0436747
1.0694	1.2696	1.0692	1.3856	1.0698	1.2101	0.0695418	0.044353
1.0761	1.2863	1.0758	1.4038	1.0765	1.2259	0.0711507	0.0451965
1.0827	1.3031	1.0824	1.4222	1.0831	1.2418	0.0727441	0.0472518
1.0893	1.3199	1.089	1.4407	1.0897	1.2578	0.0743774	0.048609
						0.0759066	0.0502311
						0.0775881	0.0501093
						0.0791833	0.0509889
						0.0807115	0.052484
						0.0823374	0.0544266
						0.0839258	0.0550614
						0.0855291	0.0562026
						0.0870406	0.0583636
						0.0886452	0.058518
						0.0902464	0.0589583
						0.0917924	0.0614736
						0.0933777	0.0626318
						0.0949306	0.063511
						0.0965453	0.0636895
						0.0980816	0.0656502
						0.0995867	0.0670666
						0.101259	0.0677597
						0.102729	0.0704424
						0.10428	0.0707608
						0.105874	0.0718135
						0.107401	0.0727591
						0.109002	0.0746923
						0.110456	0.0754212
						0.112023	0.076522
						0.113646	0.0789669
						0.115075	0.0792291
						0.116646	0.0804009
						0.118181	0.0809922
						0.11969	0.0827376
						0.121255	0.0833217
						0.122731	0.0846407
						0.124307	0.0860645
						0.125829	0.0881099
						0.127299	0.0886951
						0.128851	0.0892753
						0.130378	0.0903351
						0.131881	0.0924193
						0.133353	0.0942919
						0.13489	0.0950579
						0.136414	0.096124
						0.137873	0.0976547
						0.139387	0.0983875
						0.140881	0.0991046
						0.142423	0.100177
						0.143879	0.102611
						0.14534	0.104626
						0.146926	0.104653
						0.148336	0.105731
						0.149812	0.106462
						0.151318	0.108351
						0.152767	0.109295
						0.154336	0.110412
						0.155708	0.11107
						0.157223	0.112844
						0.158763	0.114894
						0.160124	0.115778
						0.161637	0.116661
						0.16311	0.117754
						0.164541	0.119058
						0.166042	0.120564
						0.167449	0.121966
						0.168967	0.123419
						0.170423	0.124407
						0.171813	0.126041
						0.173308	0.127072
						0.174752	0.128044
						0.176217	0.128117
						0.177609	0.130381
						0.179074	0.130666
						0.180532	0.131729
						0.181938	0.133036
						0.183376	0.134866
						0.184823	0.136187
						0.186294	0.137064
						0.187677	0.137347
						0.189085	0.13952
						0.190592	0.141949
						0.191943	0.141877
						0.193372	0.14332
						0.194798	0.144434
						0.196191	0.146172
						0.197677	0.146256
						0.199007	0.147591
						0.200468	0.148917
						0.201905	0.149423
						0.203246	0.152229
						0.204669	0.153478
						0.206085	0.154367
						0.207483	0.154917
						0.208905	0.156653
						0.210263	0.157539
						0.211697	0.158623
						0.213103	0.159978
						0.214444	0.161856
						0.215867	0.162125
						0.217267	0.163971
						0.218634	0.164207
						0.219983	0.166419
						0.221399	0.167044
						0.222801	0.169057
						0.22414	0.169622
						0.225528	0.170189
						0.226899	0.172435
						0.228305	0.174036
						0.229636	0.174078
						0.230986	0.174991
						0.232437	0.176983
						0.233737	0.178485
						0.235087	0.179339
						0.236496	0.180784
						0.237817	0.181621
						0.239237	0.183542
						0.240518	0.18401
						0.241885	0.184077
						0.243319	0.186294
						0.244561	0.187339
						0.245946	0.188707
						0.24731	0.189989
						0.248626	0.191487
						0.250001	0.192003
						0.251299	0.193073
						0.252706	0.195764
						0.25403	0.195792
						0.255313	0.198095
						0.256684	0.199011
						0.258043	0.200047
						0.259355	0.200338
						0.26063	0.201891
						0.261999	0.203955
						0.263336	0.204971
						0.264632	0.206862
						0.26597	0.207963
						0.267282	0.209787
						0.268627	0.209468
						0.269925	0.211918
						0.271207	0.213052
						0.272601	0.214276
						0.27384	0.215133
						0.275151	0.216855
						0.2765	0.218846
						0.27777	0.219364
						0.279134	0.22188
						0.280365	0.22312
						0.281708	0.222552
						0.283028	0.224591
						0.284264	0.226658
						0.285577	0.227172
						0.286883	0.229326
						0.288177	0.230143
						0.28946	0.231576
						0.290722	0.233187
						0.292065	0.233619
						0.293362	0.235558
						0.294581	0.23724
						0.295914	0.238089
						0.297192	0.238783
						0.298468	0.240506
						0.299714	0.243256
						0.301001	0.242892
						0.302326	0.24394
						0.303548	0.246063
						0.304825	0.246796
						0.306102	0.248631
						0.307386	0.249763
						0.308635	0.249966
						0.309868	0.251325
						0.311209	0.253099
						0.312421	0.254138
						0.313659	0.255278
						0.314966	0.255925
						0.316182	0.257928
						0.317491	0.258993
						0.318676	0.259521
						0.319953	0.261246
						0.321276	0.262886
						0.322433	0.263994
						0.323697	0.266578
						0.324972	0.267039
						0.32619	0.26665
						0.32744	0.269037
						0.328664	0.270576
						0.329952	0.272016
						0.331187	0.271671
						0.332384	0.273546
						0.333625	0.275026
						0.334902	0.276211
						0.336099	0.277919
						0.337299	0.279237
						0.338571	0.281567
						0.339801	0.281358
						0.34101	0.283025
						0.342246	0.284092
						0.343461	0.285107
						0.344712	0.285993
						0.345906	0.287953
						0.34709	0.287762
						0.348396	0.290312
						0.349549	0.290407
						0.350765	0.291844
						0.351997	0.29288
						0.353187	0.294553
						0.354458	0.295767
						0.355582	0.297302
						0.356827	0.298342
						0.358079	0.300133
						0.359207	0.301516
						0.360434	0.302077
						0.361632	0.303294
						0.362843	0.304787
						0.364033	0.30563
						0.3652	0.308051
						0.366447	0.307825
						0.367638	0.308858
						0.368792	0.310811
						0.370024	0.312153
						0.371211	0.313445
						0.372406	0.314537
						0.373545	0.315604
						0.374759	0.316619
						0.375953	0.31843
						0.377111	0.319344
						0.378302	0.320143
						0.379479	0.323161
						0.380682	0.323009
						0.381838	0.323322
						0.382989	0.323977
						0.38424	0.325168
						0.385348	0.327594
						0.386512	0.328653
						0.387724	0.329938
						0.388859	0.330419
						0.390076	0.333224
						0.391178	0.33446
						0.392362	0.335528
						0.393584	0.334974
						0.394673	0.336747
						0.395866	0.338192
						0.397018	0.339097
						0.398169	0.340243
						0.399331	0.341345
						0.400458	0.342906
						0.401674	0.343732
						0.402815	0.346126
						0.403921	0.347187
						0.405106	0.347537
						0.406266	0.348762
						0.40741	0.350366
						0.408506	0.350061
						0.409699	0.352333
						0.41084	0.353712
						0.411971	0.355545
						0.4131	0.356814
						0.414237	0.358008
						0.415415	0.35796
						0.416524	0.359359
						0.417636	0.36062
						0.418843	0.362978
						0.419918	0.364261
						0.421047	0.364628
						0.422209	0.365734
						0.423302	0.36749
						0.424495	0.367742
						0.425539	0.369997
						0.426707	0.370827
						0.427875	0.372583
						0.428911	0.374136
						0.430064	0.374482
						0.431194	0.376943
						0.43231	0.376937
						0.43343	0.378234
						0.434514	0.379467
						0.435677	0.380599
						0.436793	0.381445
						0.437874	0.383814
						0.439004	0.38386
						0.440124	0.385607
						0.441238	0.386064
						0.442294	0.388656
						0.443436	0.387886
						0.44455	0.389568
						0.445632	0.391355
						0.446749	0.391704
						0.447835	0.393656
						0.448983	0.394419
						0.450042	0.395977
						0.451113	0.397805
						0.452289	0.398912
						0.453313	0.400538
						0.45443	0.402131
						0.455537	0.401769
						0.456606	0.403019
						0.457752	0.403519
						0.458765	0.405999
						0.459888	0.407363
						0.46103	0.407634
						0.462036	0.409686
						0.463151	0.411043
						0.464228	0.411886
						0.465313	0.411101
						0.466404	0.413883
						0.467445	0.414875
						0.468582	0.41622
						0.46965	0.416456
						0.4707	0.417563
						0.471793	0.41983
						0.472877	0.420312
						0.47394	0.421442
						0.474981	0.42306
						0.476107	0.422658
						0.477146	0.426286
						0.478224	0.427368
						0.479265	0.427536
						0.480345	0.427982
						0.481464	0.429497
						0.48247	0.43065
						0.483531	0.431275
						0.484642	0.432478
						0.48566	0.435633
						0.486717	0.436143
						0.487797	0.437961
						0.488833	0.437502
						0.489938	0.439457
						0.490927	0.441198
						0.492003	0.440933
						0.493113	0.442382
						0.494087	0.442773
						0.495167	0.444872
						0.496222	0.445182
						0.497256	0.447696
						0.498329	0.448093
						0.499322	0.449855
						0.500431	0.450448
						0.501469	0.452414
						0.502479	0.452465
						0.503549	0.453897
						0.504588	0.455937
						0.505637	0.457453
						0.506631	0.459035
						0.507701	0.459598
						0.508743	0.460204
						0.509753	0.461743
						0.510804	0.463194
						0.511835	0.463419
						0.512889	0.466138
						0.51389	0.466911
						0.514902	0.467635
						0.516003	0.469558
						0.516982	0.46874
						0.517991	0.470399
						0.519054	0.472288
						0.520057	0.47423
						0.521132	0.474813
						0.522083	0.475798
						0.523122	0.47572
						0.524205	0.477146
						0.52515	0.479922
						0.526201	0.480805
						0.527228	0.481371
						0.528207	0.483084
						0.529255	0.482492
						0.530233	0.484572
						0.531297	0.487565
						0.532311	0.48803
						0.533267	0.487038
						0.534317	0.490194
						0.535335	0.492699
						0.536353	0.492162
						0.53732	0.493169
						0.538328	0.495678
						0.539354	0.497247
						0.540344	0.496686
						0.541353	0.497156
						0.542353	0.499005
						0.543378	0.500063
						0.544357	0.503511
						0.545332	0.504906
						0.546387	0.503339
						0.547353	0.505807
						0.548332	0.506955
						0.549355	0.507373
						0.550336	0.508409
						0.551375	0.510476
						0.552298	0.511775
						0.553309	0.512041
						0.554349	0.513755
						0.555274	0.514711
						0.556278	0.517802
						0.557289	0.519487
						0.558248	0.518524
						0.559264	0.519243
						0.560202	0.521034
						0.561231	0.521844
						0.562226	0.524765
						0.563162	0.524717
						0.564166	0.524623
						0.565158	0.527068
						0.566135	0.52827
						0.567081	0.529304
						0.568063	0.530678
						0.569062	0.532466
						0.57002	0.533476
						0.570996	0.534474
						0.571974	0.53646
						0.572961	0.536613
						0.57392	0.537748
						0.574862	0.538793
						0.575898	0.538771
						0.576817	0.541319
						0.577779	0.542189
						0.578775	0.543856
						0.579721	0.545221
						0.580719	0.545338
						0.581637	0.547147
						0.582616	0.548309
						0.583611	0.548606
						0.58452	0.551197
						0.585488	0.551072
						0.586463	0.554646
						0.587408	0.552726
						0.588385	0.555634
						0.589306	0.556305
						0.590303	0.558796
						0.591258	0.558522
						0.592189	0.5604
						0.593142	0.560973
						0.594124	0.561866
						0.595062	0.562298
						0.595988	0.564365
						0.596949	0.564934
						0.597903	0.565633
						0.598844	0.568082
						0.599788	0.570292
						0.600742	0.569923
						0.601699	0.571913
						0.602623	0.572284
						0.603552	0.572512
						0.604545	0.574616
						0.605445	0.575674
						0.606387	0.577213
						0.607341	0.577127
						0.60826	0.579714
						0.609238	0.582328
						0.61013	0.583724
						0.61107	0.583794
						0.612062	0.584302
						0.612921	0.588229
						0.613883	0.588451
						0.614824	0.589589
						0.615728	0.58938
						0.616695	0.592223
						0.617581	0.593233
						0.618553	0.595092
						0.619489	0.596075
						0.620372	0.597586
						0.621324	0.597658
						0.622261	0.599343
						0.623177	0.600755
						0.624077	0.601948
						0.625022	0.603031
						0.625949	0.604193
						0.62685	0.607936
						0.627786	0.607038
						0.628696	0.608635
						0.629647	0.608775
						0.630528	0.611678
						0.631429	0.613301
						0.632401	0.613912
						0.633276	0.616002
						0.634182	0.617066
						0.635121	0.615979
						0.636017	0.617696
						0.636972	0.619465
						0.637826	0.62054
						0.638748	0.621735
						0.639702	0.622597
						0.640561	0.624187
						0.641487	0.624868
						0.642392	0.626186
						0.643292	0.626891
						0.644199	0.629629
						0.645095	0.630781
						0.646026	0.631179
						0.646931	0.631559
						0.647813	0.633282
						0.648716	0.634021
						0.649631	0.636321
						0.650522	0.636709
						0.651391	0.637674
						0.652324	0.638322
						0.653229	0.639763
						0.654097	0.64171
						0.655004	0.643272
						0.655896	0.644286
						0.656801	0.645051
						0.657689	0.646555
						0.658553	0.647606
						0.659509	0.621272
						0.659823	-0.00727765

## Sheet: S tensile
s1	sim	s2	sim	s3	sim	s	meas
strain	stress	strain	stress	strain	stress	strain	stress
0	0	0	0	0	0	-0.185361	-0.0127745
0.021676	0.012382	0.021676	0.011332	0.021675	0.010976	-0.184084	-0.0133864
0.042549	0.024071	0.042546	0.022011	0.04254	0.021345	-0.181687	-0.0128208
0.06266	0.035133	0.062653	0.032097	0.062635	0.031164	-0.179793	-0.0133178
0.082052	0.045623	0.082037	0.041647	0.081998	0.040481	-0.178005	-0.0129279
0.10077	0.055594	0.10074	0.050707	0.10067	0.049343	-0.176126	-0.0132455
0.11884	0.065106	0.1188	0.059332	0.11868	0.057804	-0.174269	-0.0130132
0.13632	0.07441	0.13625	0.067756	0.13608	0.066085	-0.172451	-0.012775
0.15323	0.083356	0.15314	0.075843	0.15289	0.074052	-0.170684	-0.0131067
0.16962	0.091972	0.16949	0.083616	0.16914	0.081729	-0.168818	-0.0124403
0.18551	0.10028	0.18534	0.0911	0.18488	0.089137	-0.166968	-0.0126328
0.20093	0.1083	0.20071	0.098314	0.20012	0.096295	-0.16519	-0.0124373
0.21591	0.11606	0.21584	0.10528	0.21622	0.10322	-0.163374	-0.0128485
0.23163	0.12357	0.23179	0.11201	0.23222	0.10993	-0.161563	-0.0125463
0.24729	0.13085	0.24747	0.11852	0.24795	0.11644	-0.159713	-0.0121194
0.2627	0.13792	0.26289	0.12484	0.26342	0.12277	-0.157941	-0.0129926
0.27786	0.1448	0.27807	0.13096	0.27865	0.12892	-0.156186	-0.0126505
0.29278	0.15148	0.293	0.13691	0.29364	0.1349	-0.154293	-0.0121929
0.30746	0.158	0.30771	0.1427	0.30844	0.14074	-0.152571	-0.0116458
0.32192	0.16454	0.32219	0.14834	0.32301	0.14675	-0.150791	-0.0119825
0.33617	0.17281	0.33645	0.15544	0.33736	0.15417	-0.148968	-0.0117485
0.3502	0.18107	0.3505	0.16275	0.3515	0.16159	-0.147215	-0.0115204
0.36403	0.18935	0.36435	0.17006	0.36544	0.16902	-0.145352	-0.0118691
0.37766	0.19763	0.378	0.17737	0.37918	0.17646	-0.143678	-0.0123125
0.39109	0.20593	0.39145	0.18486	0.39272	0.18391	-0.141868	-0.0116734
0.40434	0.21424	0.40472	0.19262	0.40608	0.19139	-0.140008	-0.0108885
0.4174	0.22258	0.41782	0.20042	0.41925	0.19889	-0.138384	-0.0116651
0.43029	0.2313	0.43076	0.20825	0.43225	0.20641	-0.136563	-0.0118232
0.44301	0.24014	0.44351	0.21612	0.44507	0.21419	-0.134773	-0.0119708
0.45556	0.24903	0.4561	0.22401	0.45772	0.22215	-0.133058	-0.0114246
0.46794	0.25796	0.46853	0.23195	0.47021	0.23015	-0.131254	-0.0111516
0.48018	0.26694	0.4808	0.23992	0.48253	0.2382	-0.129564	-0.0110581
0.49227	0.27597	0.49291	0.24794	0.4947	0.2463	-0.127727	-0.0111297
0.50421	0.28505	0.50487	0.25599	0.50672	0.25444	-0.125978	-0.0112377
0.516	0.29419	0.51668	0.26409	0.51858	0.26263	-0.124324	-0.010901
0.52765	0.30337	0.52835	0.27223	0.53031	0.27087	-0.122529	-0.0113337
0.53916	0.31261	0.53988	0.28041	0.54189	0.27916	-0.120763	-0.0112679
0.55053	0.32191	0.55127	0.28864	0.55333	0.2875	-0.119053	-0.0107423
0.56177	0.33126	0.56253	0.29692	0.56463	0.29589	-0.11737	-0.0108108
0.57288	0.34068	0.57366	0.30525	0.57581	0.30434	-0.11562	-0.0104693
0.58386	0.35015	0.58465	0.31362	0.58685	0.31284	-0.113854	-0.0104134
0.59471	0.35968	0.59553	0.32204	0.59777	0.32139	-0.112181	-0.0101299
0.60545	0.36927	0.60628	0.33052	0.60856	0.33	-0.110446	-0.0102737
0.61607	0.37892	0.61691	0.33904	0.61923	0.33867	-0.108714	-0.0106537
0.62657	0.38863	0.62743	0.34762	0.62979	0.3474	-0.106986	-0.0103566
0.63696	0.39841	0.63783	0.35624	0.64023	0.35618	-0.105318	-0.00986455
0.64723	0.40825	0.64812	0.36493	0.65055	0.36502	-0.103633	-0.0104005
0.6574	0.41816	0.65831	0.37366	0.66077	0.37392	-0.10183	-0.00980399
0.66746	0.42813	0.66838	0.38245	0.67088	0.38288	-0.100196	-0.010099
0.67742	0.43817	0.67835	0.3913	0.68088	0.3919	-0.0985204	-0.00960322
0.68728	0.44828	0.68822	0.4002	0.69077	0.40098	-0.0967775	-0.00992115
0.69703	0.45845	0.69799	0.40916	0.70057	0.41013	-0.0951136	-0.00992506
0.70669	0.46869	0.70765	0.41817	0.71026	0.41933	-0.0933512	-0.0096524
0.71625	0.479	0.71723	0.42725	0.71986	0.4286	-0.0917622	-0.00917198
0.72572	0.48938	0.72671	0.43638	0.72936	0.43793	-0.0900571	-0.00901811
0.7351	0.49983	0.73609	0.44557	0.73877	0.44733	-0.0882775	-0.00915705
0.74439	0.51035	0.74539	0.45481	0.74808	0.45679	-0.08671	-0.00992606
0.75359	0.52094	0.7546	0.46412	0.75731	0.46631	-0.085	-0.00949537
0.7627	0.5316	0.76371	0.47349	0.76644	0.4759	-0.0833055	-0.00868295
0.77172	0.54233	0.77275	0.48292	0.77549	0.48556	-0.0816822	-0.00936958
0.78067	0.55314	0.7817	0.49241	0.78446	0.49528	-0.0799625	-0.00925091
0.78953	0.56402	0.79057	0.50196	0.79334	0.50507	-0.0783572	-0.0085024
0.79831	0.57497	0.79935	0.51157	0.80214	0.51493	-0.0766249	-0.00904455
0.80702	0.58599	0.80806	0.52125	0.81086	0.52485	-0.0749561	-0.00862114
0.81564	0.5971	0.81669	0.53099	0.81949	0.53484	-0.0733654	-0.00891762
0.82419	0.60827	0.82525	0.54079	0.82806	0.5449	-0.0716847	-0.00822971
0.83267	0.61952	0.83373	0.55065	0.83654	0.55503	-0.0700125	-0.00838446
0.84107	0.63085	0.84213	0.56058	0.84495	0.56523	-0.0683803	-0.00851591
0.8494	0.64225	0.85046	0.57057	0.85329	0.5755	-0.0667753	-0.00827369
0.85766	0.65373	0.85873	0.58063	0.86155	0.58583	-0.0650991	-0.00771575
0.86585	0.66528	0.86692	0.59075	0.86975	0.59624	-0.0634379	-0.00763073
0.87397	0.67692	0.87504	0.60093	0.87787	0.60672	-0.0618286	-0.00845365
0.88203	0.68863	0.8831	0.61118	0.88593	0.61726	-0.0601786	-0.0077393
0.89002	0.70042	0.89109	0.6215	0.89392	0.62788	-0.0585688	-0.00805124
0.89794	0.71228	0.89901	0.63189	0.90184	0.63857	-0.0568997	-0.0080221
0.9058	0.72423	0.90688	0.64234	0.9097	0.64933	-0.0552952	-0.00714917
0.9136	0.73625	0.91467	0.65285	0.9175	0.66017	-0.0537168	-0.00746861
0.92134	0.74835	0.92241	0.66343	0.92523	0.67107	-0.0519715	-0.00764904
0.92901	0.76054	0.93009	0.67408	0.93295	0.68205	-0.0504291	-0.00737178
0.93663	0.7728	0.9377	0.6848	0.94062	0.6931	-0.0488405	-0.00709912
0.94419	0.78514	0.94526	0.69559	0.94823	0.70422	-0.047182	-0.00727524
0.95169	0.79756	0.95276	0.70644	0.95577	0.71542	-0.0456107	-0.00634332
0.95913	0.81006	0.9602	0.71736	0.96327	0.72669	-0.0438971	-0.00658694
0.96652	0.82265	0.96758	0.72835	0.9707	0.73803	-0.0424088	-0.00729502
0.97385	0.83531	0.97491	0.73951	0.97807	0.74945	-0.0407673	-0.00694366
0.98113	0.84816	0.98219	0.75081	0.9854	0.76099	-0.0390916	-0.00613595
0.98836	0.86118	0.98941	0.76218	0.99266	0.77273	-0.0376168	-0.00589239
0.99553	0.87429	0.99658	0.77363	0.99987	0.78455	-0.0359712	-0.00666444
1.0026	0.88749	1.0037	0.78516	1.007	0.7965	-0.0343696	-0.00617751
1.0097	0.90078	1.0108	0.79675	1.0141	0.80961	-0.0328063	-0.00638236
1.0167	0.91415	1.0178	0.80843	1.0212	0.82283	-0.0311678	-0.00629374
1.0237	0.92761	1.0248	0.82017	1.0282	0.83617	-0.0296515	-0.00562724
1.0306	0.94239	1.0317	0.83199	1.0351	0.84961	-0.0279888	-0.00578569
1.0375	0.95732	1.0385	0.84388	1.042	0.86316	-0.0264174	-0.00583781
1.0443	0.97238	1.0454	0.85585	1.0489	0.87682	-0.0248846	-0.00569238
1.0511	0.98755	1.0521	0.86789	1.0557	0.89058	-0.0232826	-0.00530142
1.0579	1.0028	1.0589	0.88	1.0625	0.90446	-0.0216957	-0.00529504
1.0646	1.0183	1.0656	0.89219	1.0692	0.91844	-0.0201286	-0.00485798
1.0712	1.0338	1.0723	0.90445	1.0758	0.93253	-0.0186047	-0.00398873
1.0778	1.0494	1.0789	0.91679	1.0825	0.94672	-0.0170252	-0.00458082
1.0844	1.0652	1.0855	0.92919	1.089	0.96101	-0.0154302	-0.00343547
						-0.0139018	-0.00356359
						-0.0123234	-0.00399586
						-0.0107709	-0.00368316
						-0.00919211	-0.00257531
						-0.00766771	-0.00232534
						-0.00616266	-0.00228391
						-0.00449217	-0.00103594
						-0.00304436	-0.00124268
						-0.00150618	-0.000648119
						9.88599e-05	4.18382e-05
						0.00157461	0.00049383
						0.00318622	0.000357925
						0.00462297	0.00129213
						0.0061777	0.00223224
						0.00779871	0.00256175
						0.00921208	0.00278035
						0.0107772	0.00419177
						0.012289	0.00464878
						0.0138091	0.0048078
						0.0153162	0.00511352
						0.0168151	0.00643469
						0.0183684	0.00717979
						0.0198906	0.00736352
						0.021366	0.00900164
						0.0228499	0.00900585
						0.0244051	0.00986687
						0.0258739	0.0106802
						0.0273458	0.011388
						0.0288828	0.0108433
						0.0303615	0.0123183
						0.0318432	0.0134724
						0.0333346	0.0138496
						0.034812	0.0143224
						0.0363435	0.0154388
						0.0378112	0.0164194
						0.0392324	0.0159669
						0.0408066	0.0172974
						0.0422066	0.0182887
						0.0436937	0.0184156
						0.0451999	0.0193748
						0.0466216	0.0202366
						0.0481733	0.020907
						0.0495308	0.0209631
						0.0510173	0.0222966
						0.052579	0.0228626
						0.0539188	0.0239044
						0.0554156	0.0241935
						0.0568774	0.0250029
						0.0583152	0.0257089
						0.0597946	0.026649
						0.061174	0.0268605
						0.0626982	0.027919
						0.0641328	0.0288008
						0.0655279	0.0299912
						0.0670131	0.0301017
						0.0684523	0.0308145
						0.0699117	0.0322979
						0.0712665	0.0328345
						0.0727318	0.0334567
						0.0741793	0.0347512
						0.0755768	0.0353949
						0.0770251	0.035476
						0.0784343	0.0362366
						0.0798949	0.0370167
						0.0812894	0.0378588
						0.0826608	0.038017
						0.0841576	0.0389192
						0.0855095	0.0393496
						0.0869174	0.0403505
						0.0883705	0.0411706
						0.0897428	0.0426267
						0.0912079	0.0427842
						0.0925293	0.0431481
						0.0939533	0.0447244
						0.0954284	0.045377
						0.0967282	0.0453463
						0.0981566	0.0463746
						0.0995524	0.0474613
						0.100925	0.0484403
						0.102353	0.0488078
						0.103691	0.0488272
						0.105125	0.04951
						0.106527	0.0496444
						0.107848	0.0502557
						0.109266	0.0518059
						0.110647	0.0525434
						0.11202	0.0539871
						0.113354	0.0543286
						0.11476	0.0545661
						0.116148	0.0549944
						0.117477	0.0556404
						0.118851	0.0569868
						0.120223	0.0579959
						0.121619	0.0578531
						0.122956	0.0590263
						0.124277	0.0597773
						0.125728	0.0608169
						0.127009	0.060935
						0.12836	0.061649
						0.129734	0.0625911
						0.131061	0.062708
						0.132482	0.0638604
						0.133739	0.0645882
						0.135117	0.0648852
						0.136527	0.0658406
						0.137769	0.066572
						0.139146	0.0675213
						0.14049	0.0682358
						0.141808	0.0692219
						0.143174	0.0700635
						0.144458	0.0707097
						0.14585	0.0711704
						0.147171	0.0715415
						0.148445	0.0724116
						0.149811	0.0729268
						0.151137	0.0734392
						0.152455	0.0746862
						0.153747	0.0758187
						0.155087	0.0755175
						0.15642	0.0763201
						0.157702	0.0776883
						0.159017	0.077039
						0.16034	0.0783848
						0.161681	0.0798284
						0.162951	0.0807196
						0.16423	0.0802133
						0.165615	0.0817699
						0.16686	0.0821674
						0.168158	0.0831384
						0.169474	0.0838103
						0.170749	0.0840277
						0.172115	0.085971
						0.173324	0.0853563
						0.174662	0.085966
						0.175979	0.0871619
						0.177216	0.0880696
						0.178506	0.0883339
						0.179808	0.0890874
						0.18109	0.0898008
						0.182383	0.0906986
						0.183628	0.09179
						0.184957	0.09257
						0.186241	0.0925793
						0.187462	0.0931037
						0.188776	0.0937751
						0.190061	0.0941348
						0.191324	0.0954705
						0.192553	0.0961844
						0.193851	0.0972351
						0.195129	0.0982299
						0.196362	0.0969764
						0.197637	0.0994366
						0.198904	0.100108
						0.200185	0.100975
						0.201417	0.100753
						0.202653	0.101456
						0.20398	0.102784
						0.205179	0.102535
						0.206409	0.103645
						0.207709	0.104936
						0.208927	0.105928
						0.210228	0.106512
						0.211405	0.106684
						0.21267	0.106868
						0.213984	0.107334
						0.215129	0.108464
						0.216394	0.110092
						0.217657	0.110247
						0.218863	0.110754
						0.220132	0.111345
						0.221317	0.112752
						0.222611	0.113251
						0.223838	0.11375
						0.225009	0.11513
						0.22628	0.115202
						0.227521	0.116283
						0.228734	0.117578
						0.229913	0.117895
						0.231159	0.118545
						0.232395	0.119071
						0.233596	0.120332
						0.23482	0.119771
						0.236028	0.119938
						0.237267	0.121725
						0.238463	0.122035
						0.239653	0.122786
						0.240932	0.124747
						0.242079	0.124719
						0.243283	0.125469
						0.244522	0.126235
						0.245696	0.126505
						0.246959	0.128143
						0.248089	0.128426
						0.249317	0.128447
						0.250549	0.129193
						0.251684	0.129808
						0.252899	0.130605
						0.254099	0.131225
						0.255298	0.13137
						0.256477	0.133091
						0.257641	0.133616
						0.25888	0.134587
						0.260078	0.135017
						0.261206	0.135701
						0.262437	0.137308
						0.263607	0.136824
						0.264791	0.137795
						0.265941	0.138385
						0.267125	0.138777
						0.268353	0.140927
						0.269481	0.140522
						0.270666	0.14164
						0.27184	0.14181
						0.273031	0.143286
						0.274172	0.143635
						0.275325	0.144539
						0.276568	0.145512
						0.277683	0.146431
						0.278819	0.146461
						0.280032	0.147243
						0.281165	0.147735
						0.282371	0.148641
						0.283471	0.149756
						0.284648	0.149168
						0.285866	0.15022
						0.286941	0.15138
						0.288109	0.152358
						0.289294	0.152525
						0.290416	0.15333
						0.291572	0.154451
						0.292697	0.155533
						0.293893	0.156965
						0.295045	0.156611
						0.296152	0.157175
						0.297302	0.15834
						0.298471	0.159272
						0.299588	0.159336
						0.300699	0.159905
						0.301868	0.161188
						0.30302	0.162203
						0.304131	0.163008
						0.305267	0.163382
						0.306401	0.163954
						0.30756	0.164807
						0.308658	0.165919
						0.309772	0.166687
						0.310973	0.166883
						0.312038	0.167931
						0.313161	0.168579
						0.314308	0.169917
						0.315411	0.169214
						0.316589	0.170219
						0.317631	0.171676
						0.318785	0.17259
						0.31995	0.17265
						0.320988	0.174267
						0.322131	0.175701
						0.323246	0.175163
						0.324365	0.175542
						0.325478	0.176603
						0.326556	0.177949
						0.327704	0.178866
						0.328822	0.178931
						0.329885	0.179376
						0.331029	0.18132
						0.332134	0.181439
						0.333235	0.182455
						0.334305	0.182889
						0.335424	0.183664
						0.336553	0.185095
						0.337608	0.185492
						0.338719	0.185994
						0.339816	0.187535
						0.340933	0.187607
						0.342003	0.189453
						0.343064	0.189487
						0.344226	0.189885
						0.345268	0.190545
						0.346346	0.19127
						0.347471	0.192853
						0.348522	0.192933
						0.34965	0.192863
						0.350682	0.194552
						0.351782	0.195635
						0.352922	0.19598
						0.353931	0.197504
						0.355024	0.198881
						0.35612	0.198574
						0.357178	0.198558
						0.358263	0.200191
						0.359311	0.201537
						0.360442	0.202896
						0.361508	0.203205
						0.362536	0.202431
						0.363628	0.203795
						0.364714	0.204715
						0.365779	0.206068
						0.366803	0.20531
						0.367902	0.207442
						0.368976	0.20773
						0.370016	0.209313
						0.371088	0.209527
						0.372134	0.210002
						0.373235	0.211901
						0.374263	0.21163
						0.375299	0.212783
						0.376428	0.213426
						0.377429	0.214288
						0.378477	0.215699
						0.379555	0.215911
						0.380581	0.216072
						0.38168	0.217482
						0.382661	0.218443
						0.383746	0.219691
						0.384846	0.220047
						0.385807	0.220399
						0.386886	0.222424
						0.387928	0.221695
						0.388968	0.223474
						0.390011	0.223491
						0.391027	0.224821
						0.392111	0.225676
						0.393151	0.226142
						0.394148	0.22649
						0.395217	0.227023
						0.396261	0.22876
						0.397294	0.229072
						0.398285	0.231182
						0.39935	0.230447
						0.400383	0.232681
						0.401396	0.232217
						0.402438	0.233772
						0.403452	0.234624
						0.404527	0.23515
						0.405512	0.236638
						0.406511	0.237305
						0.407609	0.237643
						0.408569	0.239061
						0.409603	0.238425
						0.410641	0.240639
						0.411643	0.241263
						0.412709	0.241736
						0.413659	0.243638
						0.414704	0.243224
						0.415774	0.243919
						0.41671	0.245855
						0.417752	0.24532
						0.418758	0.247988
						0.419771	0.247985
						0.420794	0.248665
						0.42176	0.24898
						0.422834	0.250808
						0.423831	0.250302
						0.424809	0.251696
						0.425827	0.252632
						0.42684	0.253286
						0.427834	0.254348
						0.428811	0.254682
						0.429859	0.254674
						0.430835	0.256513
						0.431839	0.257474
						0.43282	0.258105
						0.433819	0.259453
						0.434861	0.259618
						0.435806	0.261613
						0.436802	0.261483
						0.437837	0.261902
						0.438786	0.263244
						0.439787	0.264022
						0.440793	0.264314
						0.441762	0.264227
						0.442793	0.266897
						0.443722	0.267047
						0.444729	0.268335
						0.445767	0.26781
						0.446679	0.268765
						0.447694	0.270779
						0.448674	0.272314
						0.449646	0.271224
						0.450643	0.27289
						0.451584	0.274038
						0.452619	0.274781
						0.453591	0.275001
						0.454532	0.276349
						0.455543	0.278021
						0.456512	0.278886
						0.457491	0.279443
						0.458425	0.280559
						0.459424	0.280834
						0.4604	0.282319
						0.461354	0.281602
						0.462339	0.283531
						0.463294	0.284202
						0.464292	0.284835
						0.465231	0.285545
						0.466176	0.286896
						0.467203	0.288348
						0.468118	0.288866
						0.469071	0.289964
						0.470074	0.290753
						0.471007	0.291563
						0.472012	0.293324
						0.472908	0.294105
						0.473881	0.294321
						0.47489	0.294475
						0.47578	0.295183
						0.476766	0.297339
						0.477728	0.298613
						0.478651	0.298934
						0.479641	0.299552
						0.480551	0.300336
						0.481546	0.302382
						0.482501	0.302759
						0.483398	0.303991
						0.484387	0.303933
						0.485339	0.305399
						0.486286	0.307165
						0.487198	0.306741
						0.488147	0.308501
						0.489113	0.309102
						0.490043	0.310432
						0.490987	0.310159
						0.491925	0.31144
						0.492881	0.311967
						0.493815	0.313519
						0.494719	0.31472
						0.495714	0.315683
						0.496617	0.316315
						0.497533	0.316898
						0.498508	0.319113
						0.499415	0.321308
						0.500395	0.321247
						0.501276	0.322138
						0.502216	0.322248
						0.503193	0.322252
						0.504064	0.323229
						0.505005	0.325504
						0.505945	0.325551
						0.506859	0.326155
						0.507811	0.327363
						0.508693	0.328985
						0.509657	0.330124
						0.510598	0.330941
						0.511467	0.331305
						0.512415	0.3332
						0.513354	0.333669
						0.514266	0.33583
						0.515162	0.334978
						0.516085	0.336367
						0.517029	0.336995
						0.517919	0.338607
						0.518837	0.338544
						0.51976	0.340813
						0.520689	0.341363
						0.521594	0.34248
						0.522477	0.342739
						0.523448	0.343729
						0.52432	0.345426
						0.525214	0.345458
						0.526152	0.347028
						0.527048	0.347574
						0.527991	0.34856
						0.528848	0.349393
						0.529776	0.351213
						0.530709	0.352279
						0.531564	0.35277
						0.532479	0.354358
						0.533387	0.355016
						0.534293	0.355014
						0.535203	0.356638
						0.536074	0.358172
						0.537005	0.359282
						0.537905	0.359741
						0.538784	0.361205
						0.539676	0.36307
						0.540607	0.364379
						0.54149	0.364724
						0.542356	0.364361
						0.543268	0.367034
						0.544169	0.368101
						0.545053	0.368449
						0.545945	0.369322
						0.546831	0.370488
						0.547745	0.371691
						0.548612	0.372945
						0.549488	0.372998
						0.550424	0.375238
						0.551269	0.374722
						0.552159	0.375991
						0.553065	0.378387
						0.553925	0.378974
						0.554849	0.379908
						0.55569	0.381222
						0.55658	0.382753
						0.557512	0.384716
						0.558315	0.38407
						0.559229	0.385742
						0.560116	0.386693
						0.560969	0.388518
						0.561877	0.388284
						0.562715	0.388884
						0.563629	0.390336
						0.564505	0.390585
						0.565348	0.39275
						0.566242	0.393251
						0.567123	0.39531
						0.567993	0.396314
						0.56884	0.397274
						0.569727	0.39758
						0.570602	0.398868
						0.571449	0.400006
						0.572335	0.401594
						0.573197	0.401403
						0.574091	0.40386
						0.574926	0.40416
						0.57578	0.405788
						0.576694	0.405867
						0.577517	0.407368
						0.578368	0.408955
						0.579261	0.410561
						0.580101	0.41142
						0.581008	0.411946
						0.581818	0.413169
						0.582688	0.415021
						0.583586	0.415994
						0.584391	0.414618
						0.585272	0.416597
						0.586129	0.419312
						0.58698	0.42034
						0.587836	0.42097
						0.588679	0.42221
						0.589559	0.423149
						0.590416	0.423747
						0.59124	0.427046
						0.592102	0.426048
						0.592976	0.427286
						0.593808	0.428876
						0.594627	0.42851
						0.595502	0.431206
						0.59636	0.432266
						0.597186	0.433634
						0.59804	0.433859
						0.598877	0.435953
						0.599742	0.437895
						0.600578	0.437528
						0.601397	0.439405
						0.602298	0.441191
						0.603097	0.439704
						0.603933	0.443264
						0.604803	0.44265
						0.605616	0.444643
						0.606494	0.446537
						0.607283	0.446632
						0.608138	0.448339
						0.609014	0.449756
						0.609801	0.449538
						0.610647	0.452141
						0.61149	0.452689
						0.612319	0.454817
						0.613163	0.454932
						0.613969	0.457406
						0.614839	0.458057
						0.615675	0.458717
						0.616476	0.459773
						0.617317	0.460145
						0.61815	0.462243
						0.618977	0.463817
						0.619775	0.464305
						0.620635	0.465044
						0.62146	0.467404
						0.622277	0.468701
						0.623104	0.470689
						0.62392	0.470677
						0.624764	0.471574
						0.625573	0.471756
						0.626381	0.473816
						0.627253	0.475186
						0.628033	0.474863
						0.628854	0.476419
						0.629694	0.478899
						0.630496	0.48087
						0.631349	0.480956
						0.632119	0.482397
						0.632965	0.483754
						0.633801	0.484835
						0.634576	0.486345
						0.635401	0.487487
						0.636217	0.488972
						0.637038	0.48906
						0.637846	0.491625
						0.638642	0.493019
						0.639488	0.493296
						0.640294	0.494512
						0.641088	0.496084
						0.641905	0.497545
						0.642727	0.497514
						0.643531	0.498759
						0.644307	0.501154
						0.645136	0.503031
						0.645947	0.503296
						0.646739	0.505508
						0.647561	0.506421
						0.648351	0.507106
						0.649184	0.507562
						0.649973	0.508574
						0.65075	0.511644
						0.651604	0.512607
						0.652368	0.513586
						0.653164	0.515554
						0.653989	0.518034
						0.654763	0.518694
						0.655602	0.518822
						0.656354	0.519902
						0.657167	0.521664
						0.658007	0.522605
						0.658745	0.524012
						0.659565	0.525682
						0.660359	0.525814
						0.661139	0.52875
						0.661952	0.530677
						0.662717	0.529816
						0.663546	0.532049
						0.664339	0.532874
						0.665099	0.534231
						0.665912	0.536117
						0.666706	0.537049
						0.667487	0.538743
						0.668257	0.540202
						0.669061	0.540823
						0.669861	0.541213
						0.670629	0.543908
						0.671416	0.543367
						0.6722	0.545343
						0.673013	0.547017
						0.673772	0.547825
						0.674545	0.550034
						0.675374	0.55135
						0.676122	0.551898
						0.676902	0.553447
						0.677702	0.554608
						0.678467	0.55641
						0.67928	0.556068
						0.680011	0.557608
						0.680815	0.559854
						0.681626	0.560342
						0.682344	0.562399
						0.683143	0.56296
						0.683926	0.564228
						0.684686	0.565457
						0.685483	0.567192
						0.686232	0.568628
						0.687042	0.569592
						0.687814	0.570195
						0.688559	0.571476
						0.689353	0.572865
						0.690126	0.573969
						0.690898	0.57531
						0.691638	0.577853
						0.692426	0.577436
						0.693205	0.579718
						0.693955	0.580067
						0.694739	0.581239
						0.695499	0.581806
						0.696287	0.58455
						0.697032	0.58602
						0.697781	0.58752
						0.698599	0.589105
						0.699322	0.590989
						0.70009	0.590431
						0.700863	0.593065
						0.701616	0.593755
						0.702414	0.59535
						0.703122	0.595631
						0.703907	0.597857
						0.704706	0.598634
						0.70541	0.599433
						0.706191	0.601278
						0.706954	0.602701
						0.707696	0.603314
						0.708474	0.608191
						0.709201	0.606877
						0.709996	0.608248
						0.710753	0.610198
						0.711473	0.61206
						0.712249	0.612153
						0.713009	0.615036
						0.713764	0.615841
						0.714487	0.616305
						0.715258	0.618303
						0.716025	0.619993
						0.716755	0.620545
						0.717515	0.622463
						0.718253	0.623857
						0.719046	0.625544
						0.719751	0.625639
						0.720507	0.628439
						0.721278	0.628417
						0.721999	0.630132
						0.722752	0.635008
						0.723497	0.634038
						0.72425	0.634481
						0.72501	0.636826
						0.725722	0.63799
						0.726484	0.64041
						0.727257	0.641862
						0.727948	0.641304
						0.728706	0.645524
						0.729457	0.644735
						0.730194	0.647913
						0.730944	0.647846
						0.73165	0.651146
						0.732435	0.651786
						0.733178	0.653465
						0.733879	0.654721
						0.734646	0.655941
						0.735373	0.658094
						0.73612	0.658303
						0.736829	0.662149
						0.73758	0.662117
						0.738336	0.664244
						0.739042	0.6666
						0.739791	0.667656
						0.740517	0.669605
						0.74126	0.66906
						0.74198	0.671326
						0.7427	0.671648
						0.743476	0.675172
						0.744178	0.676825
						0.744902	0.678191
						0.745652	0.679577
						0.746363	0.680785
						0.747126	0.682751
						0.747809	0.683263
						0.748554	0.684915
						0.749321	0.687363
						0.749992	0.68837
						0.750747	0.691009
						0.751473	0.691418
						0.752178	0.693498
						0.752923	0.694438
						0.753618	0.69685
						0.754384	0.699469
						0.755105	0.697827
						0.755799	0.701698
						0.756538	0.702683
						0.757261	0.705114
						0.757981	0.706817
						0.758683	0.708523
						0.759415	0.710618
						0.760149	0.711832
						0.76085	0.712645
						0.761573	0.714823
						0.762286	0.716449
						0.763024	0.717109
						0.763725	0.720251
						0.764424	0.721393
						0.765184	0.722935
						0.765871	0.725863
						0.766579	0.727611
						0.76731	0.727412
						0.768015	0.730165
						0.768756	0.731688
						0.76943	0.732397
						0.770146	0.733209
						0.770899	0.736023
						0.771563	0.737651
						0.772291	0.738832
						0.773005	0.740345
						0.773705	0.74192
						0.774429	0.744413
						0.775109	0.746148
						0.775853	0.74745
						0.776559	0.749367
						0.777236	0.751148
						0.77797	0.752876
						0.77868	0.755074
						0.779387	0.756127
						0.780064	0.757516
						0.780781	0.760342
						0.781505	0.760509
						0.782188	0.764175
						0.782892	0.766254
						0.783596	0.76582
						0.784316	0.768461
						0.785006	0.771225
						0.785689	0.771929
						0.786431	0.774322
						0.7871	0.77532
						0.787794	0.776654
						0.788512	0.779484
						0.789199	0.781107
						0.789927	0.78317
						0.79059	0.786065
						0.791301	0.785557
						0.792025	0.788231
						0.792676	0.790023
						0.793388	0.791838
						0.794085	0.792335
						0.794781	0.79507
						0.795474	0.79561
						0.796154	0.798351
						0.796874	0.79979
						0.797573	0.801154
						0.798231	0.802252
						0.798944	0.805733
						0.799645	0.80671
						0.800332	0.80772
						0.800995	0.809048
						0.80172	0.811893
						0.802395	0.81344
						0.803083	0.815732
						0.803765	0.818462
						0.804459	0.818696
						0.805174	0.819564
						0.805834	0.821768
						0.806507	0.825147
						0.807233	0.827369
						0.807891	0.827842
						0.80858	0.828401
						0.809274	0.830955
						0.809944	0.834112
						0.810655	0.835314
						0.811306	0.836599
						0.812001	0.837641
						0.812713	0.84129
						0.813355	0.841328
						0.814048	0.844937
						0.814732	0.844985
						0.815409	0.847384

## Sheet: P tensile
p1	sim	p1	meas	p2	sim	p2	meas
strain	stress	strain	stress	strain	stress	strain	stress
0	0	0	0	0	0	0	0.00414516
0.00744417	0.00252575	0.00497512	0.00119643	0.00744417	0.00128802	0.00485135	-0.000346992
0.0147783	0.00539722	0.00990099	0.00120238	0.0147783	0.00346995	0.00965586	-0.00418266
0.0220049	0.00896361	0.0148996	-0.00241696	0.0220049	0.00740665	0.014657	0.00945316
0.0291262	0.0135576	0.019728	-0.000242887	0.0291262	0.0139215	0.0194877	0.00562687
0.0361446	0.0194974	0.0245092	0.00244077	0.0361446	0.0238044	0.0242713	0.00635906
0.0430622	0.0270886	0.0293618	-0.00098119	0.0430622	0.0378116	0.0291262	0.0156114
0.0498812	0.036625	0.0339331	0.00123229	0.0498812	0.0566596	0.0336997	0.0142562
0.0566038	0.0483888	0.0386926	0.00891643	0.0566038	0.0810511	0.0384615	0.0196883
0.0632319	0.0626521	0.0434055	0.00846256	0.0632319	0.111639	0.0431767	0.0323578
0.0697674	0.0796705	0.0478458	0.0110026	0.0697674	0.149067	0.047619	0.0418914
0.0762125	0.0997017	0.0523573	0.0263812	0.0762125	0.193944	0.052245	0.050052
0.0825688	0.122982	0.0568262	0.0333221	0.0825688	0.246852	0.056715	0.0684805
0.0888383	0.149741	0.0613634	0.043376	0.0888383	0.308361	0.0611431	0.0910893
0.0950226	0.180204	0.065748	0.0611643	0.0950226	0.379015	0.0655297	0.111684
0.101124	0.214592	0.0700918	0.0709235	0.101124	0.459314	0.0698756	0.136155
0.107143	0.253106	0.0745025	0.0887554	0.107143	0.549771	0.0742884	0.177103
0.113082	0.295946	0.0786594	0.107762	0.113082	0.650868	0.0784472	0.203544
0.118943	0.343309	0.0829895	0.12359	0.118943	0.763098	0.0827792	0.241018
0.124726	0.395381	0.0871748	0.142154	0.124726	0.886885	0.0870706	0.303565
0.130435	0.452345	0.0913221	0.162193	0.130435	1.02266	0.0911157	0.339152
		0.0954319	0.185303			0.0953296	0.393534
		0.0995047	0.208087			0.0994034	0.467732
		0.103641	0.228172			0.103441	0.513912
		0.107541	0.263317			0.107442	0.586888
		0.111605	0.283282			0.111407	0.663971
		0.115631	0.305572			0.115436	0.721056
		0.119428	0.346366			0.119234	0.822938
		0.123384	0.366398			0.123192	0.909191
		0.127209	0.394738
		0.131002	0.437011
		0.134761	0.457347
		0.138488	0.493871
		0.142275	0.531583
		0.145847	0.552761
		0.149569	0.600256
		0.15326	0.632116
		0.156741	0.66704
		0.160369
		0.16388
		0.167361
		0.170813
		0.174236
		0.177716
		0.180999
		0.184422
		0.187817
		0.19102
		0.194361
		0.197593
